# Supplementary material for: Comprehensive Air Quality Model With Extensions, v7.20: Formulation and Evaluation for Ozone and Particulate Matter Over the US
Source: Copernicus journal article supplement (doi:10.5194/gmd-2024-48), 2024-06-11
Supplement: Supplementary file 1 [file gmd-2024-48-supplement.pdf]

# Comprehensive Air Quality Model With Extensions, v7.20: Formulation and Evaluation for Ozone and Particulate Matter Over the US

## Supplemental Information

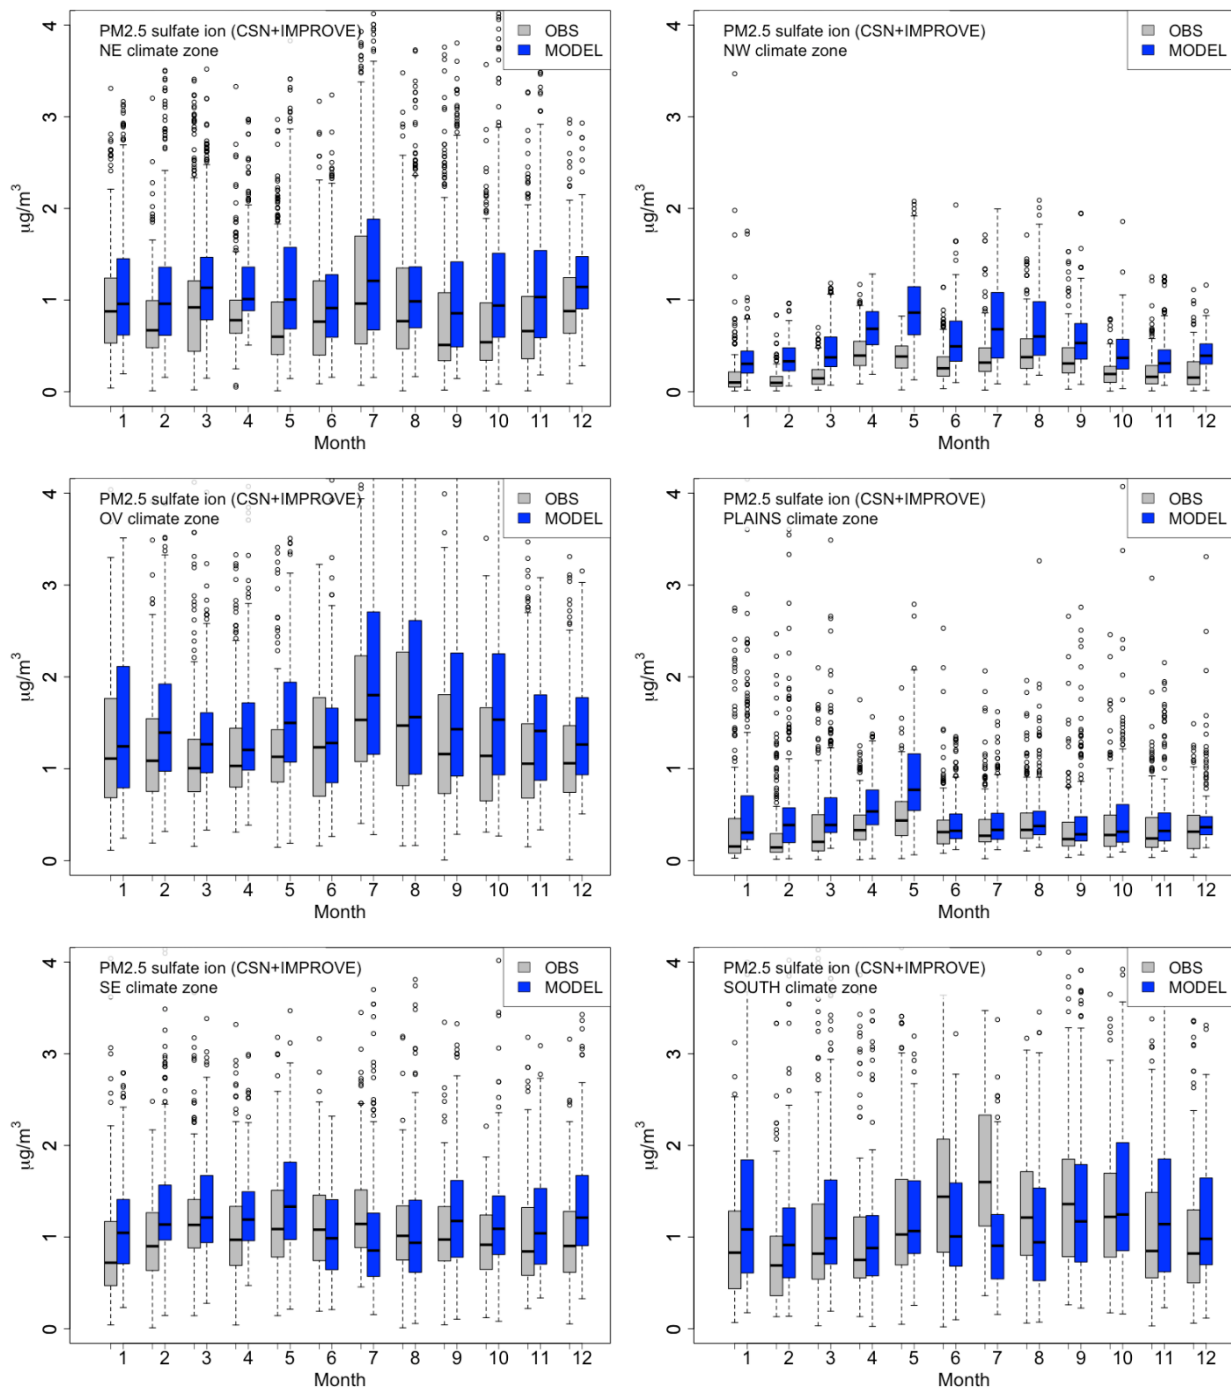

**Figure S1. Monthly comparison between 2016 observed (grey) and simulated (blue) 24-h particulate sulfate concentration for each of the nine NOAA climate regions shown in Figure 12. Boxes represent the interquartile range (25<sup>th</sup> to 75<sup>th</sup> percentile with median shown by the center line), dashed whiskers represent 1.5 times the interquartile range, and circles represent individual outlier values.**

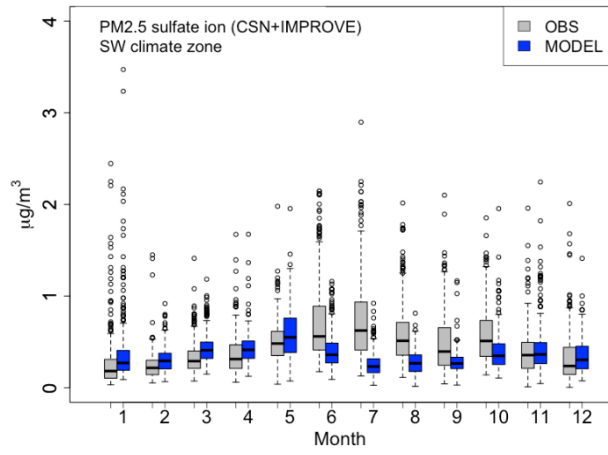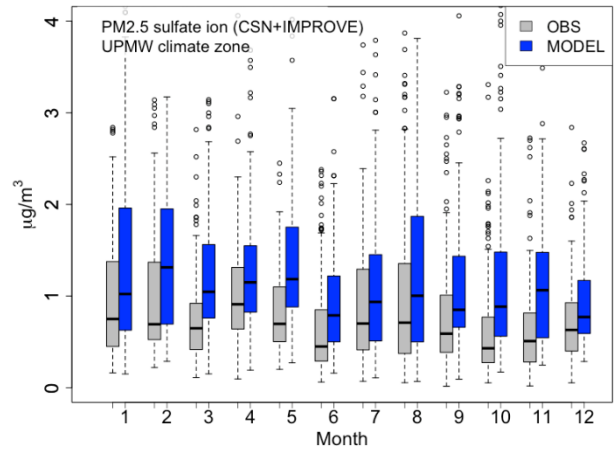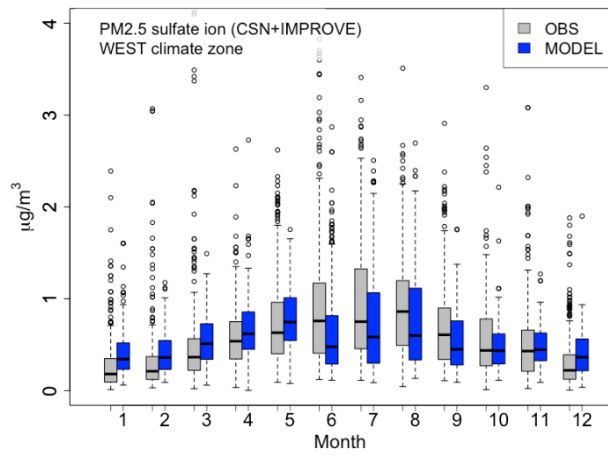

Figure S1 (Concluded).

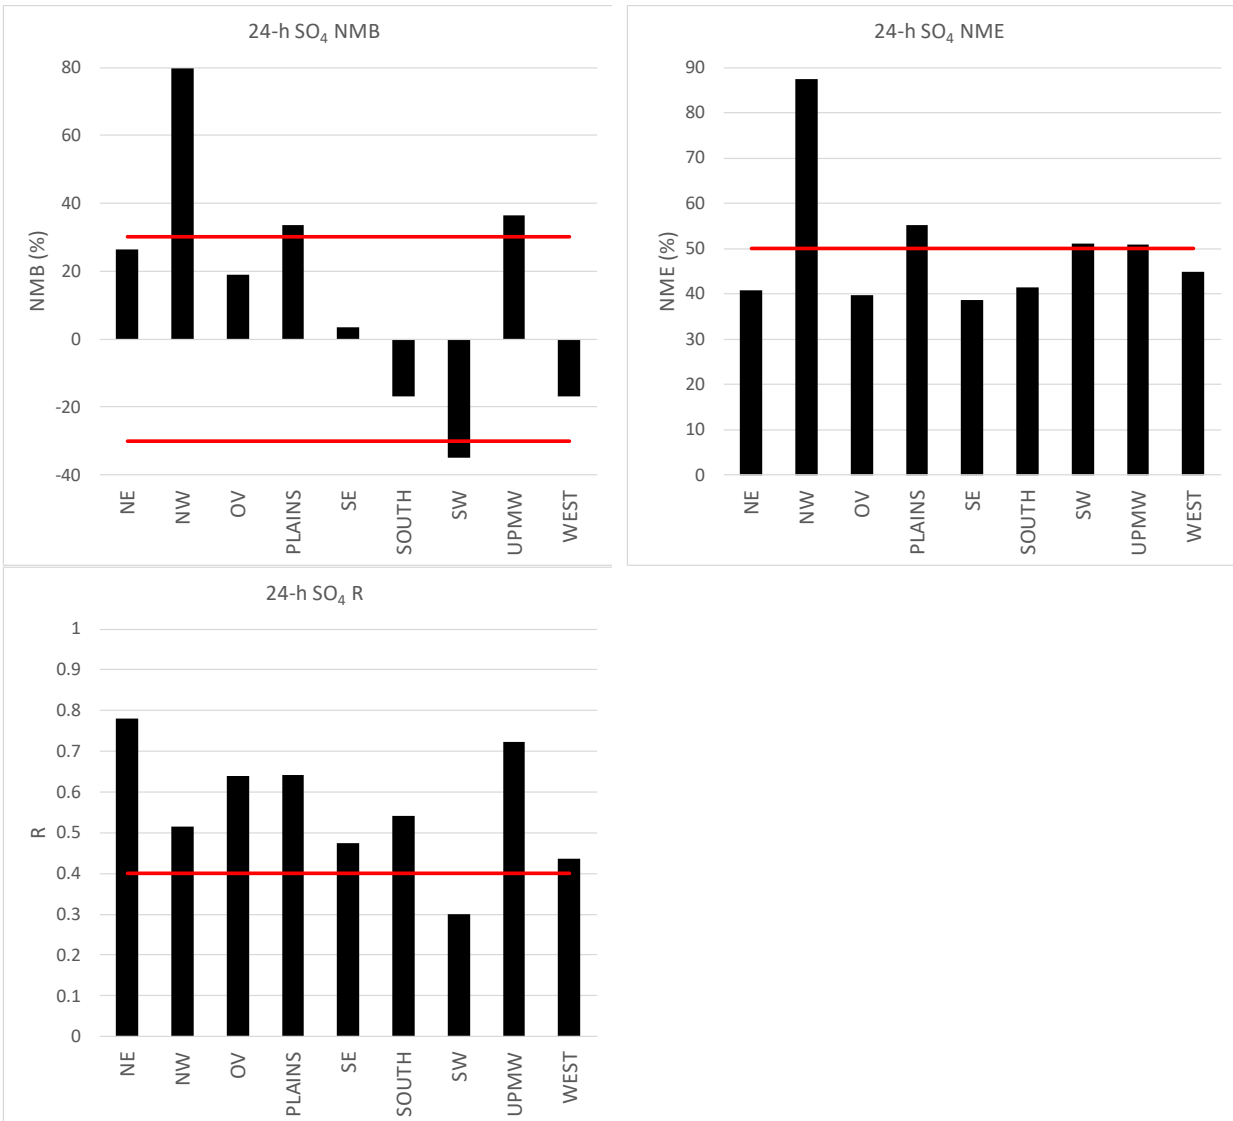

**Figure S2. Statistical model performance (NMB, NME, r) in replicating 24-h particulate sulfate over the April-September, 2016 warm season by US climate zone. Criteria benchmarks are shown as red lines.**

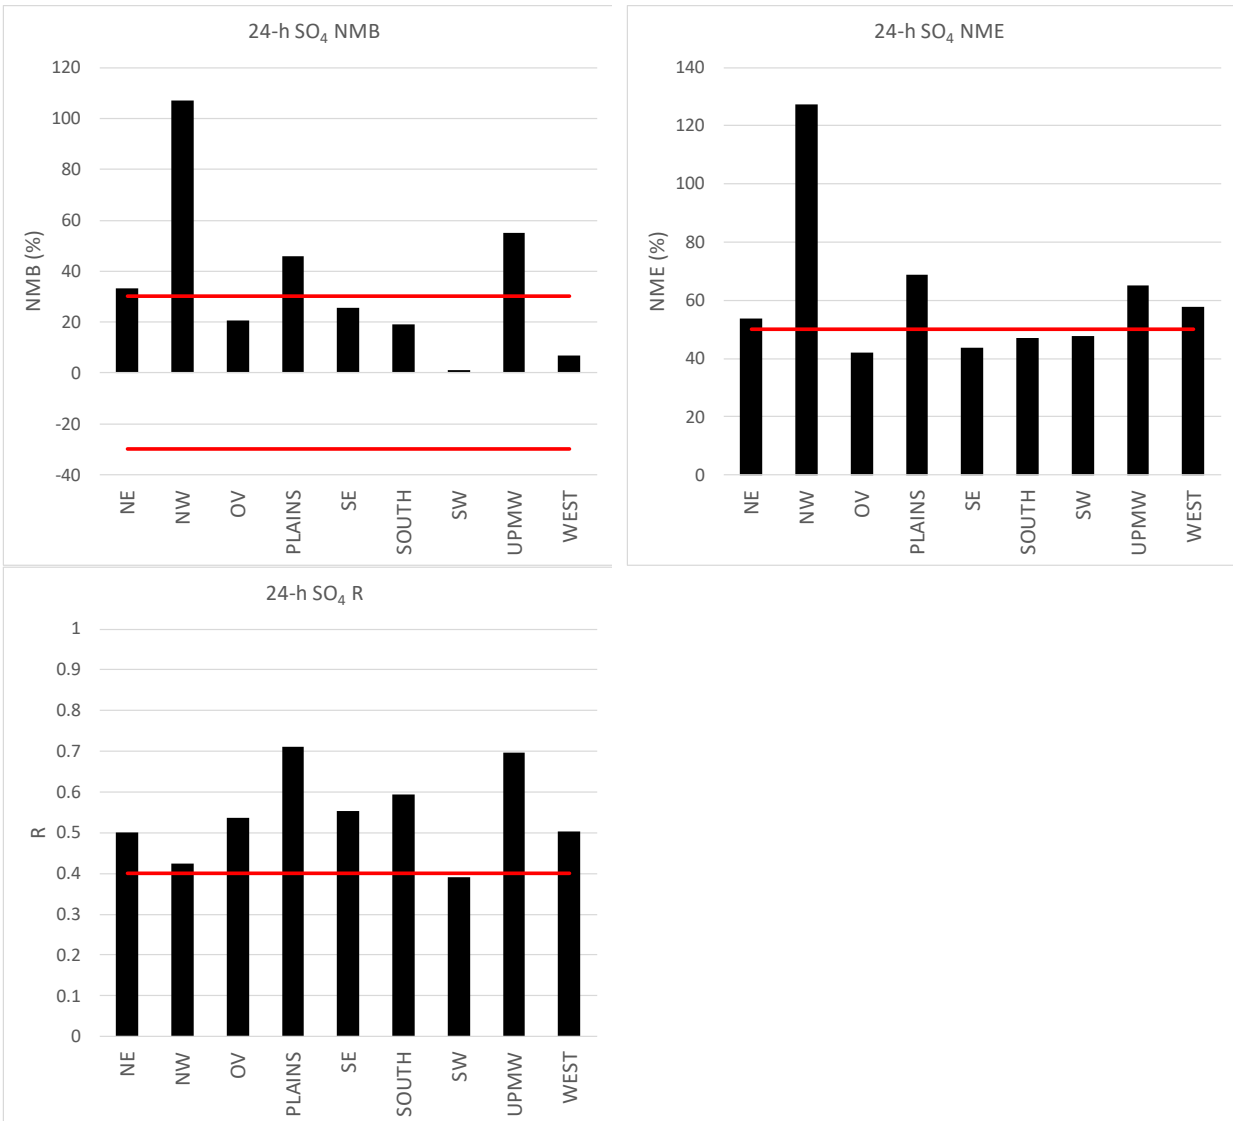

**Figure S3. Statistical model performance (NMB, NME, r) in replicating 24-h particulate sulfate over the combined January-March and October-December, 2016 cool seasons by US climate zone. Criteria benchmarks are shown as red lines.**

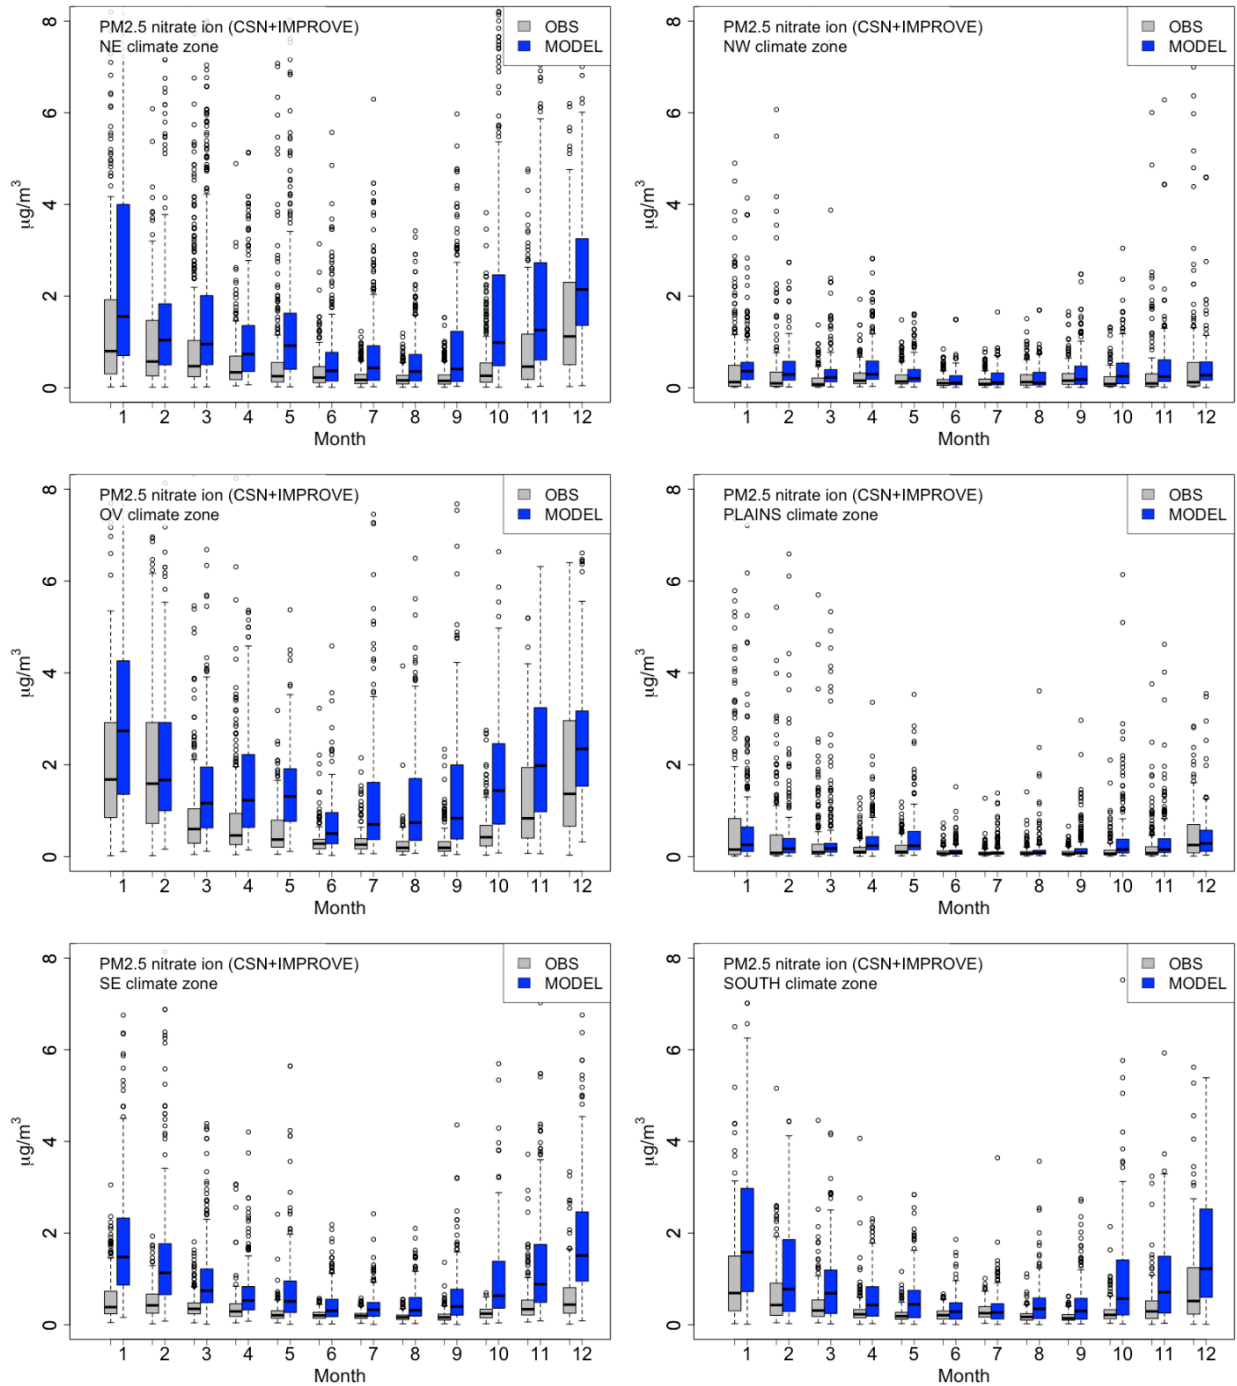

**Figure S4. Monthly comparison between 2016 observed (grey) and simulated (blue) 24-h particulate nitrate concentration for each of the nine NOAA climate regions shown in Figure 12. Boxes represent the interquartile range (25<sup>th</sup> to 75<sup>th</sup> percentile with median shown by the center line), dashed whiskers represent 1.5 times the interquartile range, and circles represent individual outlier values.**

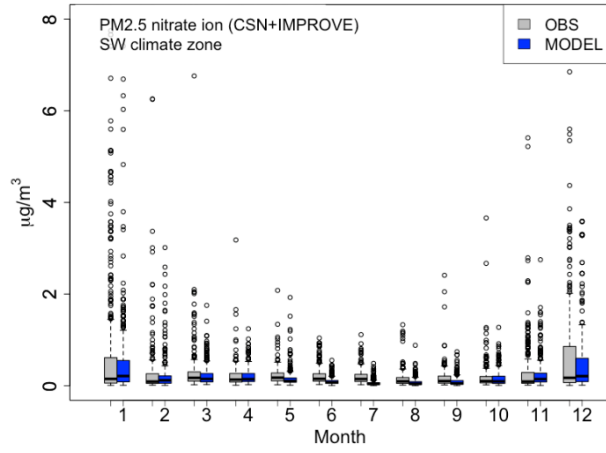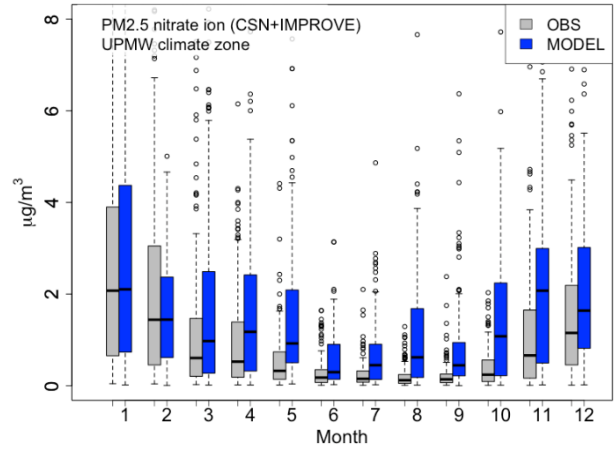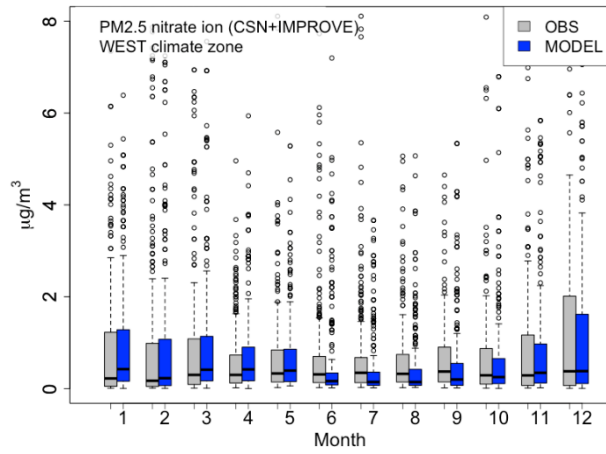

Figure S4 (Concluded).

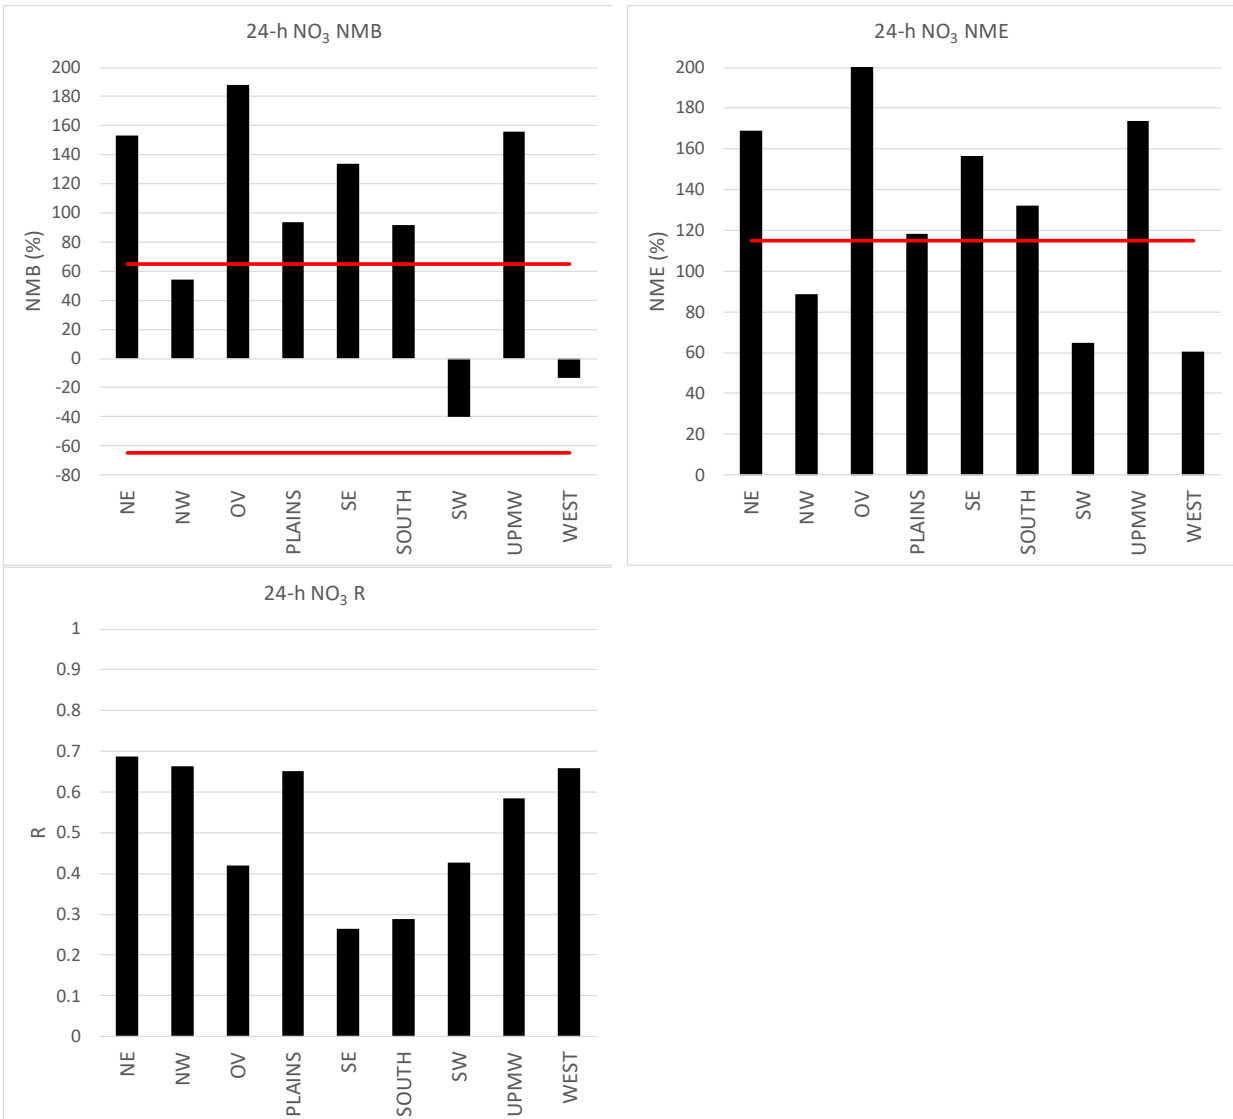

**Figure S5. Statistical model performance (NMB, NME, r) in replicating 24-h particulate nitrate over the April-September, 2016 warm season by US climate zone. Criteria benchmarks are shown as red lines.**

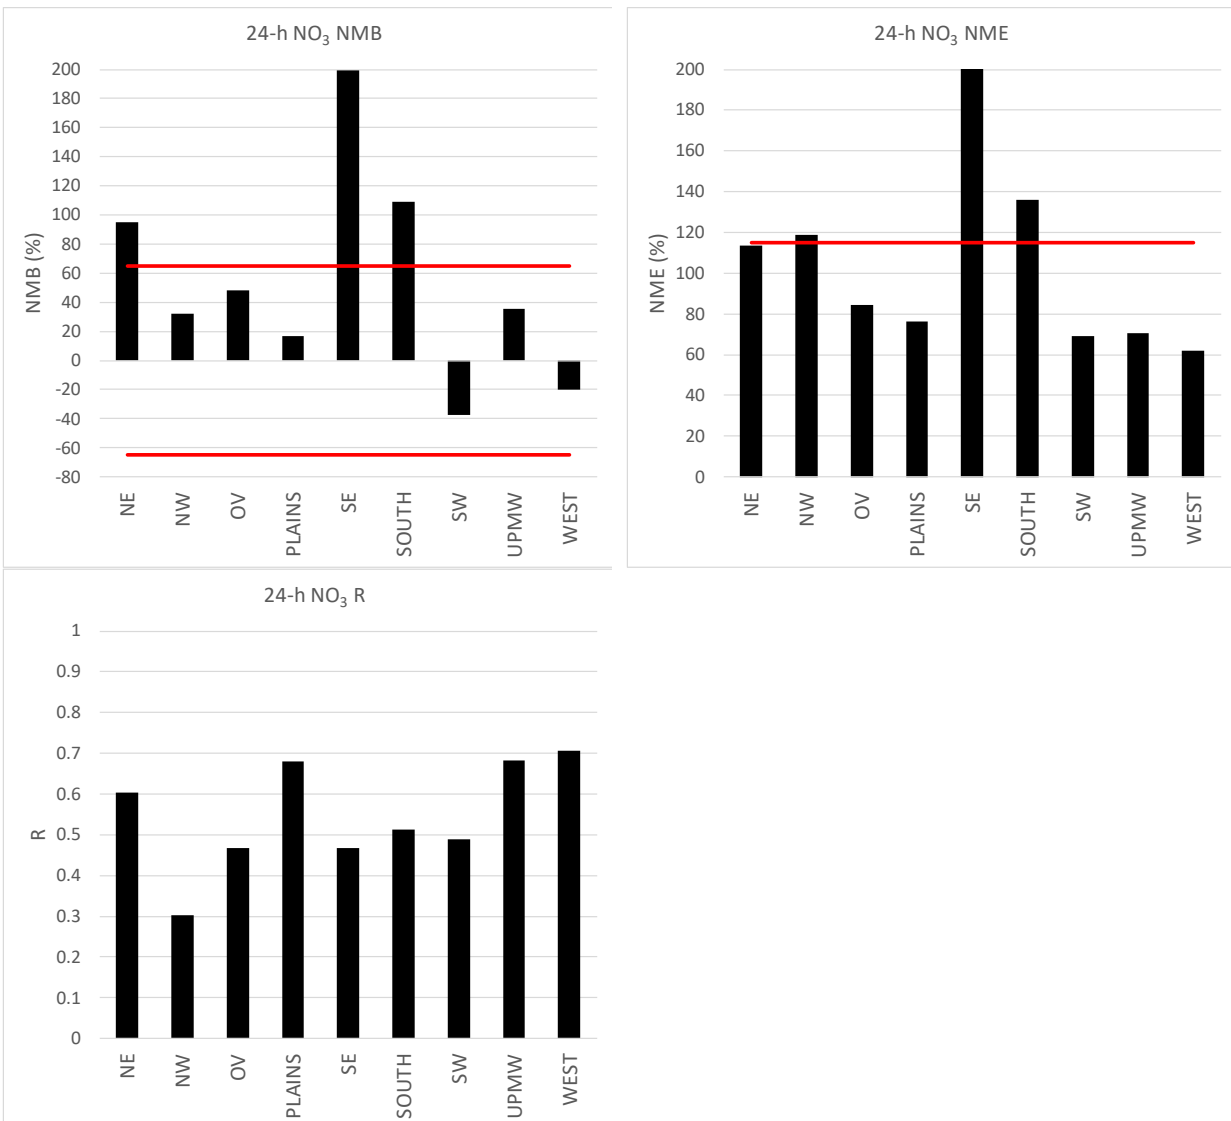

**Figure S6. Statistical model performance (NMB, NME, r) in replicating 24-h particulate nitrate over the combined January-March and October-December, 2016 cool seasons by US climate zone. Criteria benchmarks are shown as red lines.**



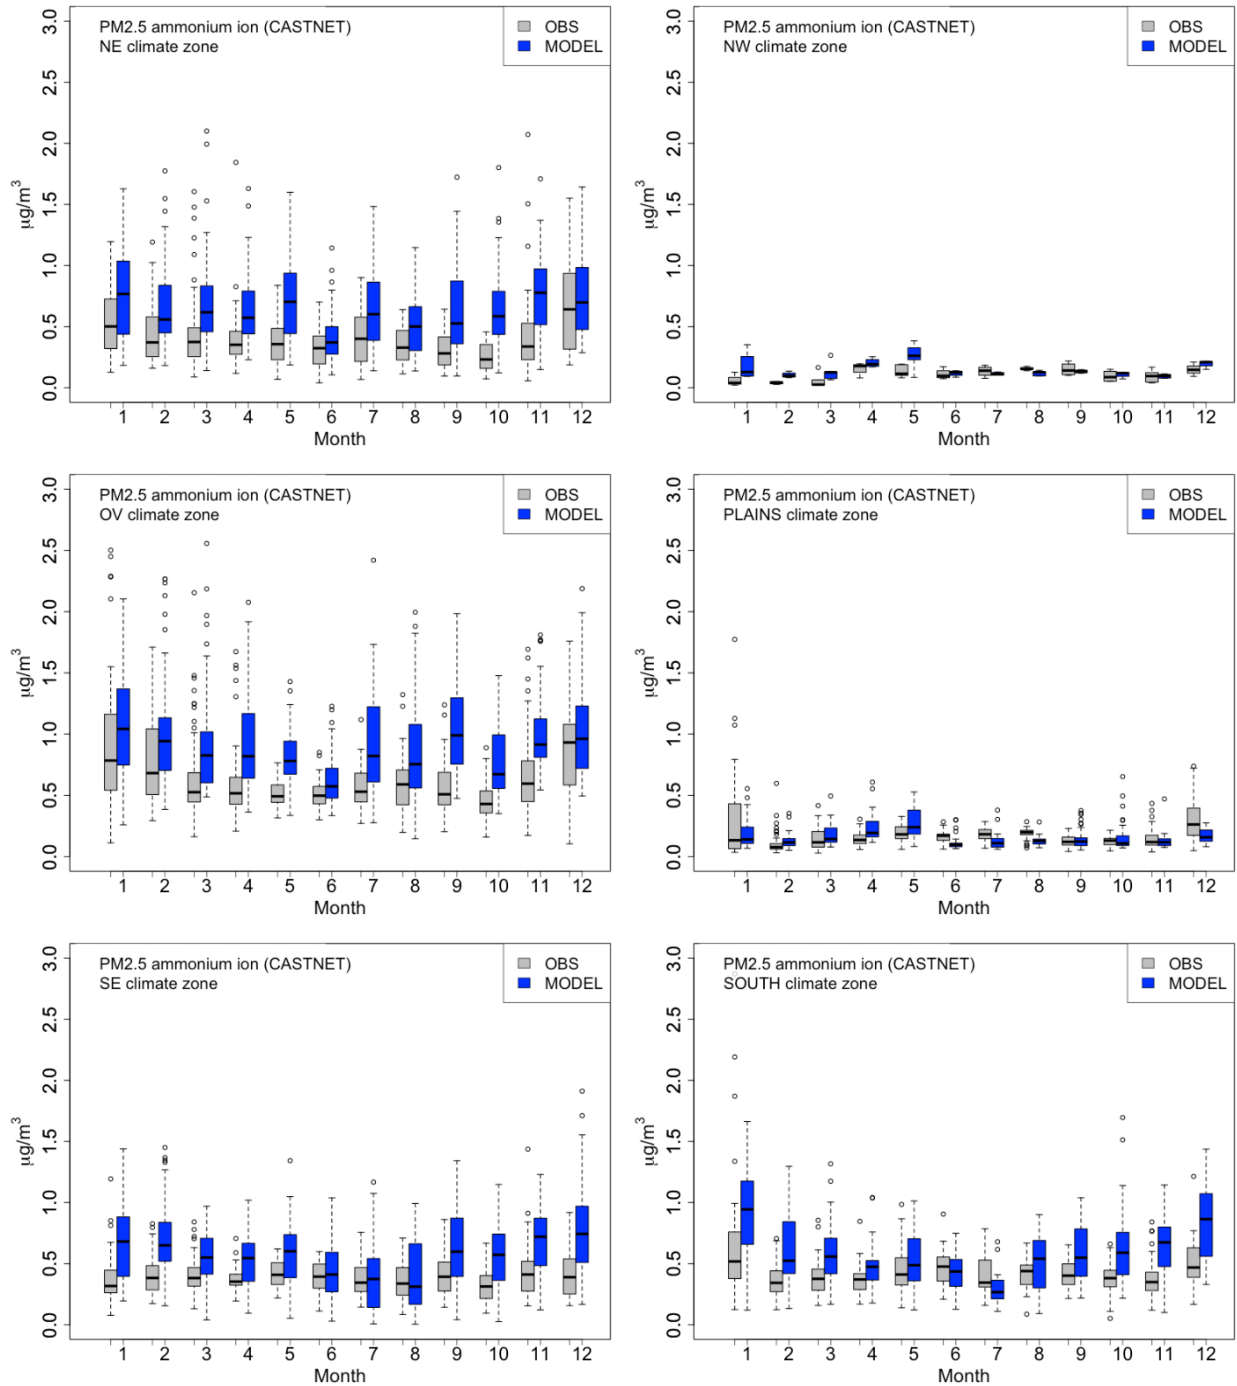

**Figure S7. Monthly comparison between 2016 observed (grey) and simulated (blue) 24-h particulate ammonium concentration for each of the nine NOAA climate regions shown in Figure 12. Boxes represent the interquartile range (25<sup>th</sup> to 75<sup>th</sup> percentile with median shown by the center line), dashed whiskers represent 1.5 times the interquartile range, and circles represent individual outlier values.**

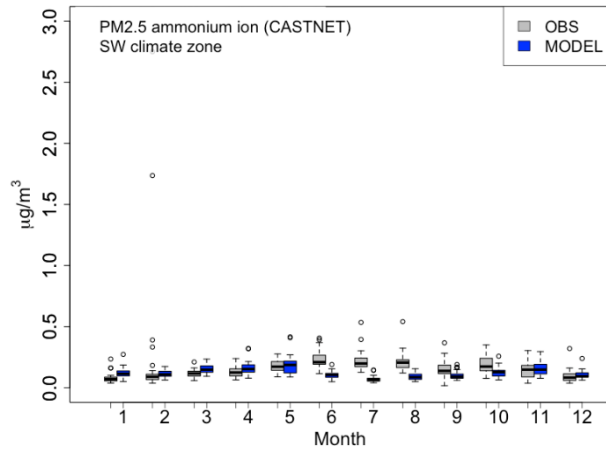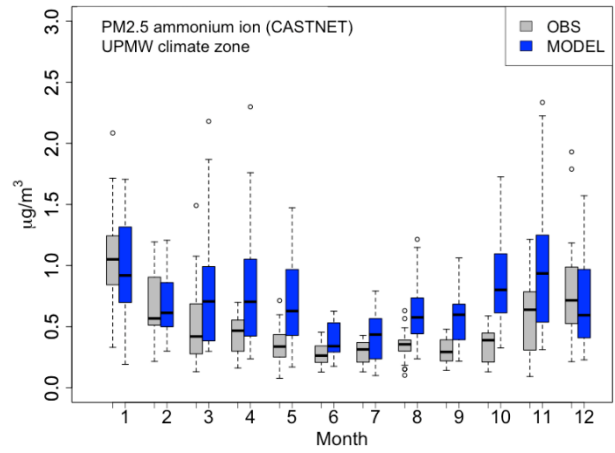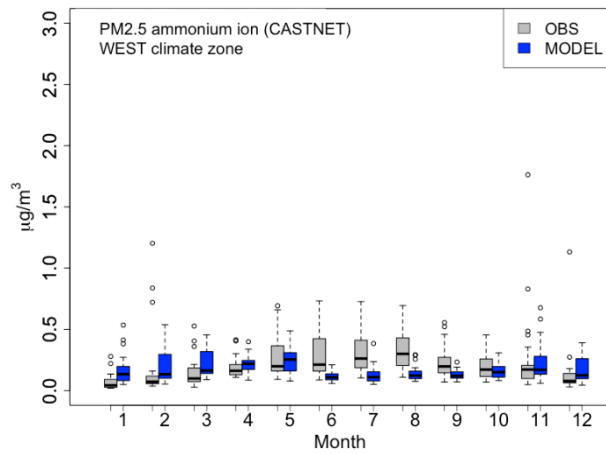

**Figure S7 (Concluded).**

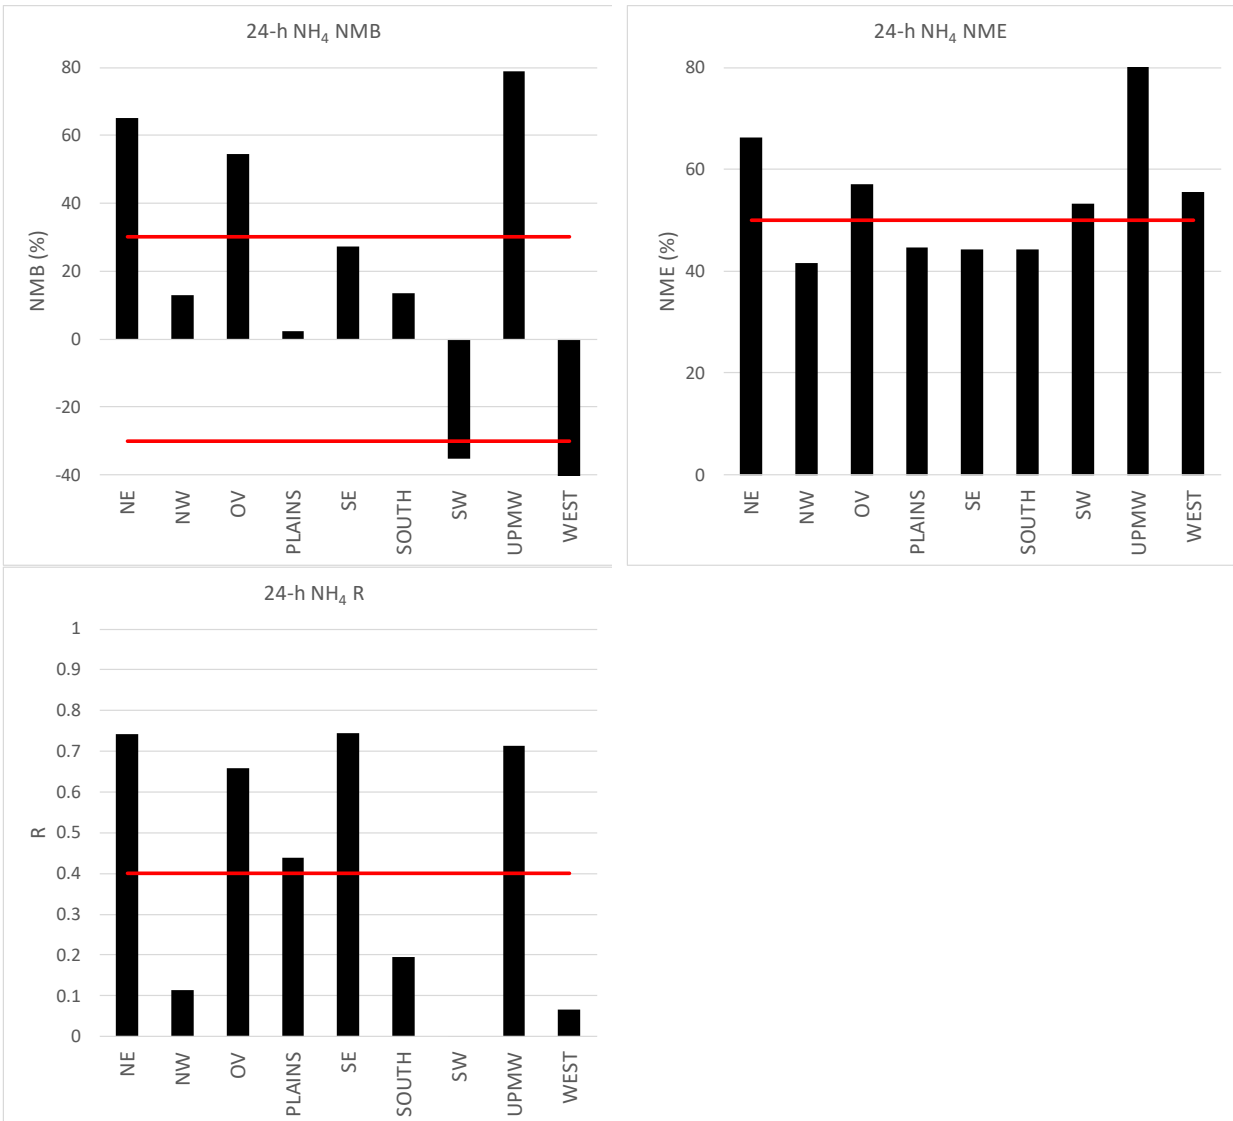

**Figure S8. Statistical model performance (NMB, NME, r) in replicating 24-h particulate ammonium over the April-September, 2016 warm season by US climate zone. Criteria benchmarks are shown as red lines.**

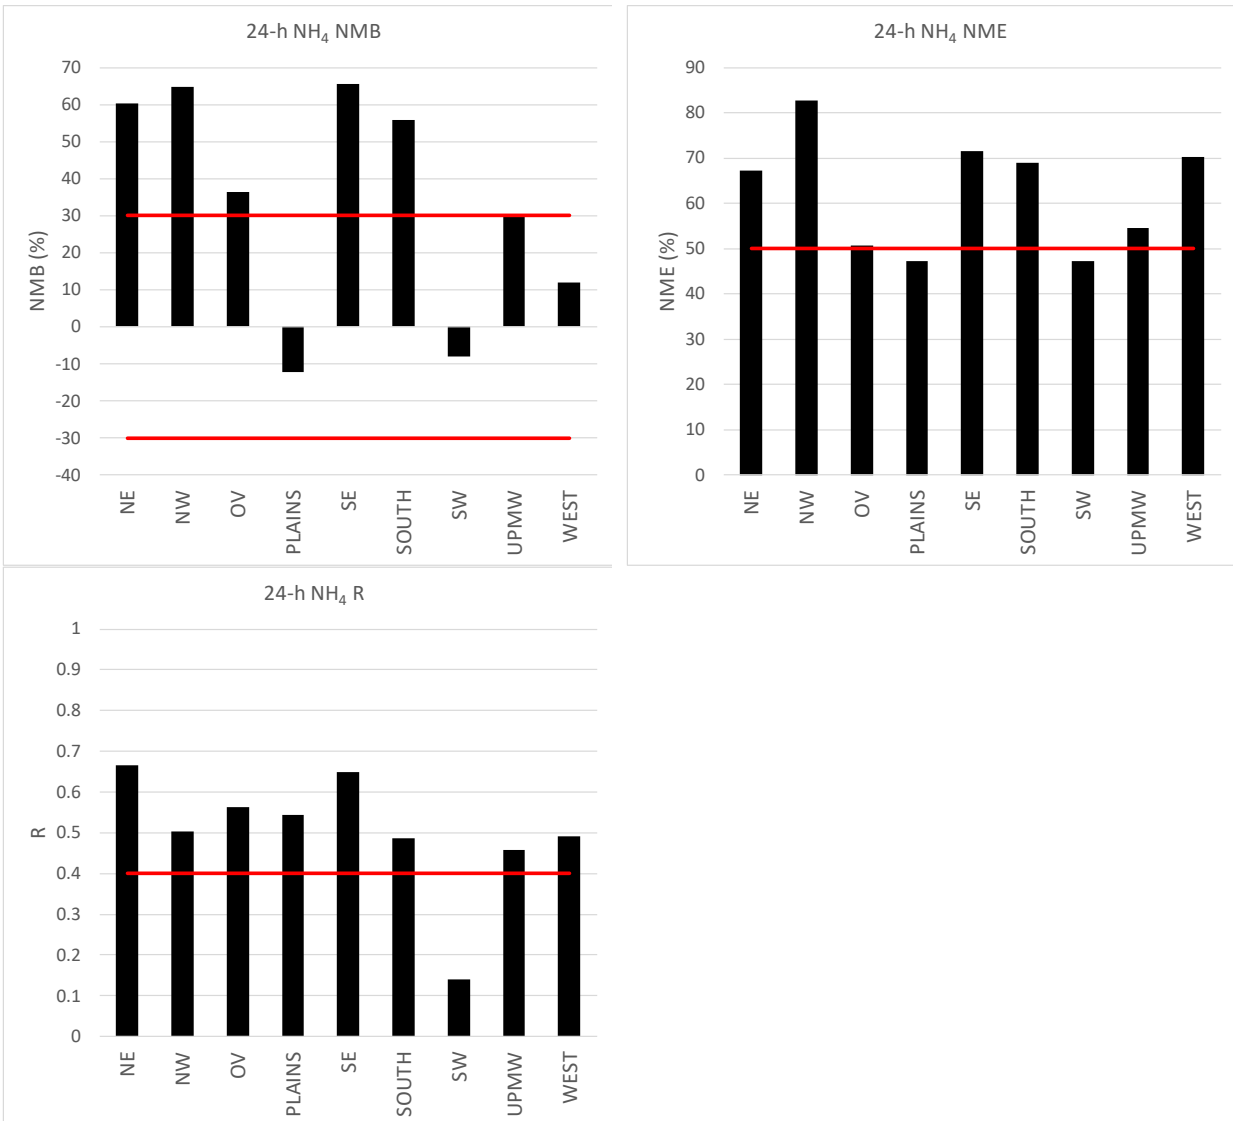

**Figure S9. Statistical model performance (NMB, NME, r) in replicating 24-h particulate ammonium over the combined January-March and October-December, 2016 cool seasons by US climate zone. Criteria benchmarks are shown as red lines.**

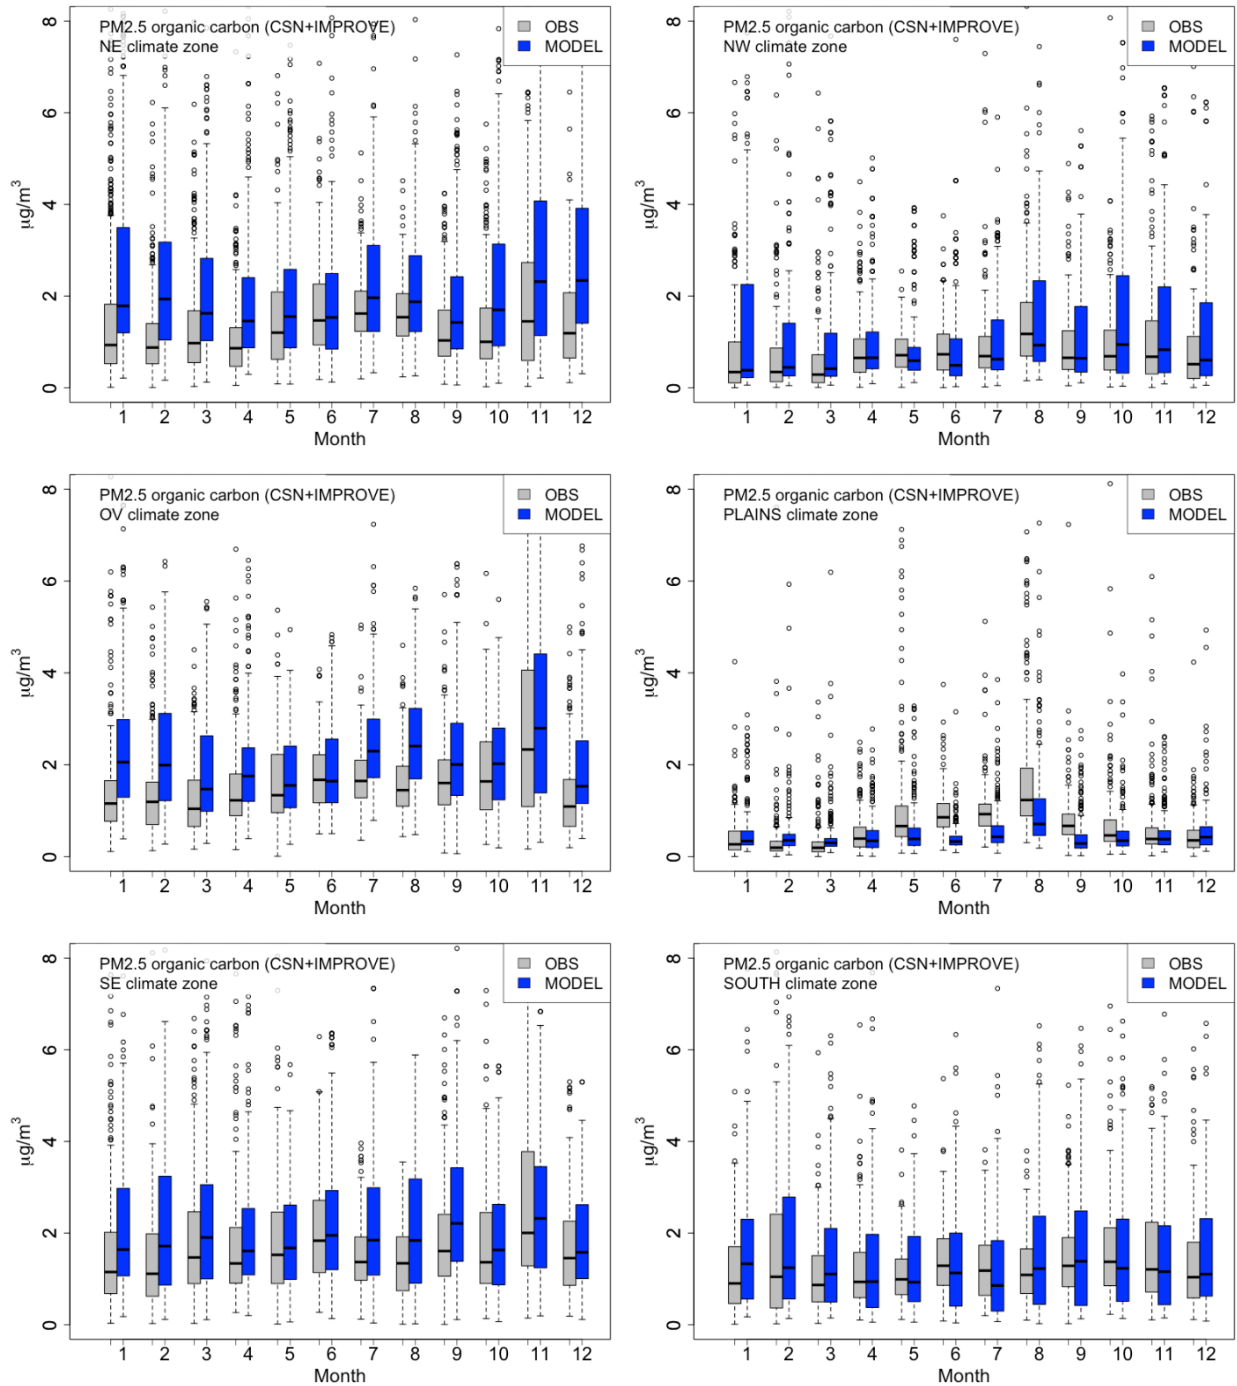

**Figure S10. Monthly comparison between 2016 observed (grey) and simulated (blue) 24-h particulate organic carbon concentration for each of the nine NOAA climate regions shown in Figure 12. Boxes represent the interquartile range (25<sup>th</sup> to 75<sup>th</sup> percentile with median shown by the center line), dashed whiskers represent 1.5 times the interquartile range, and circles represent individual outlier values.**

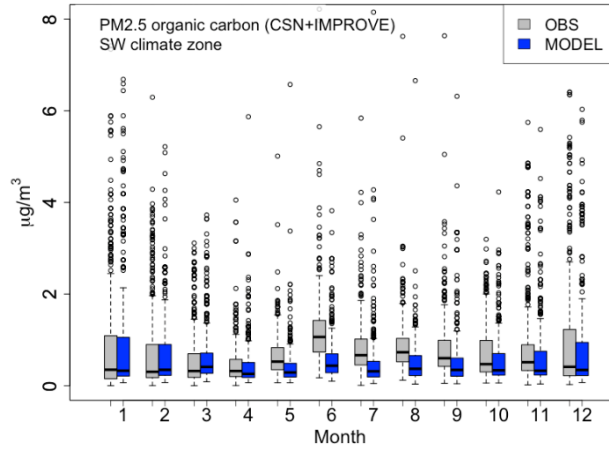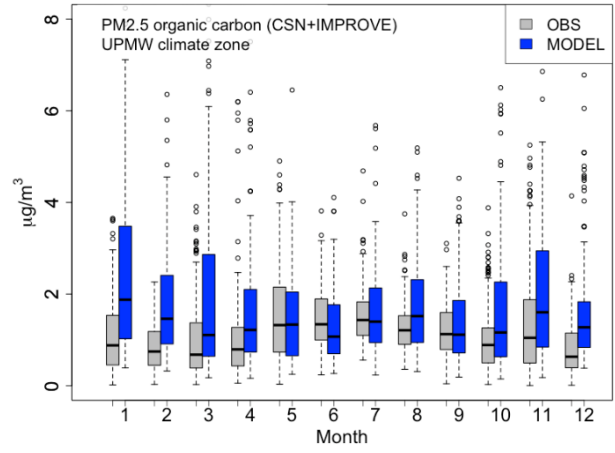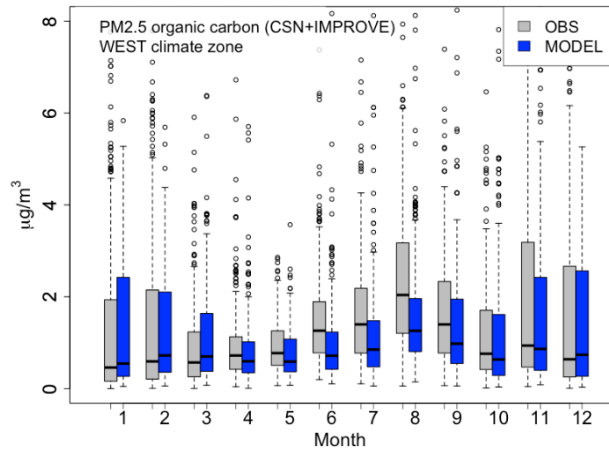

Figure S10 (Concluded).

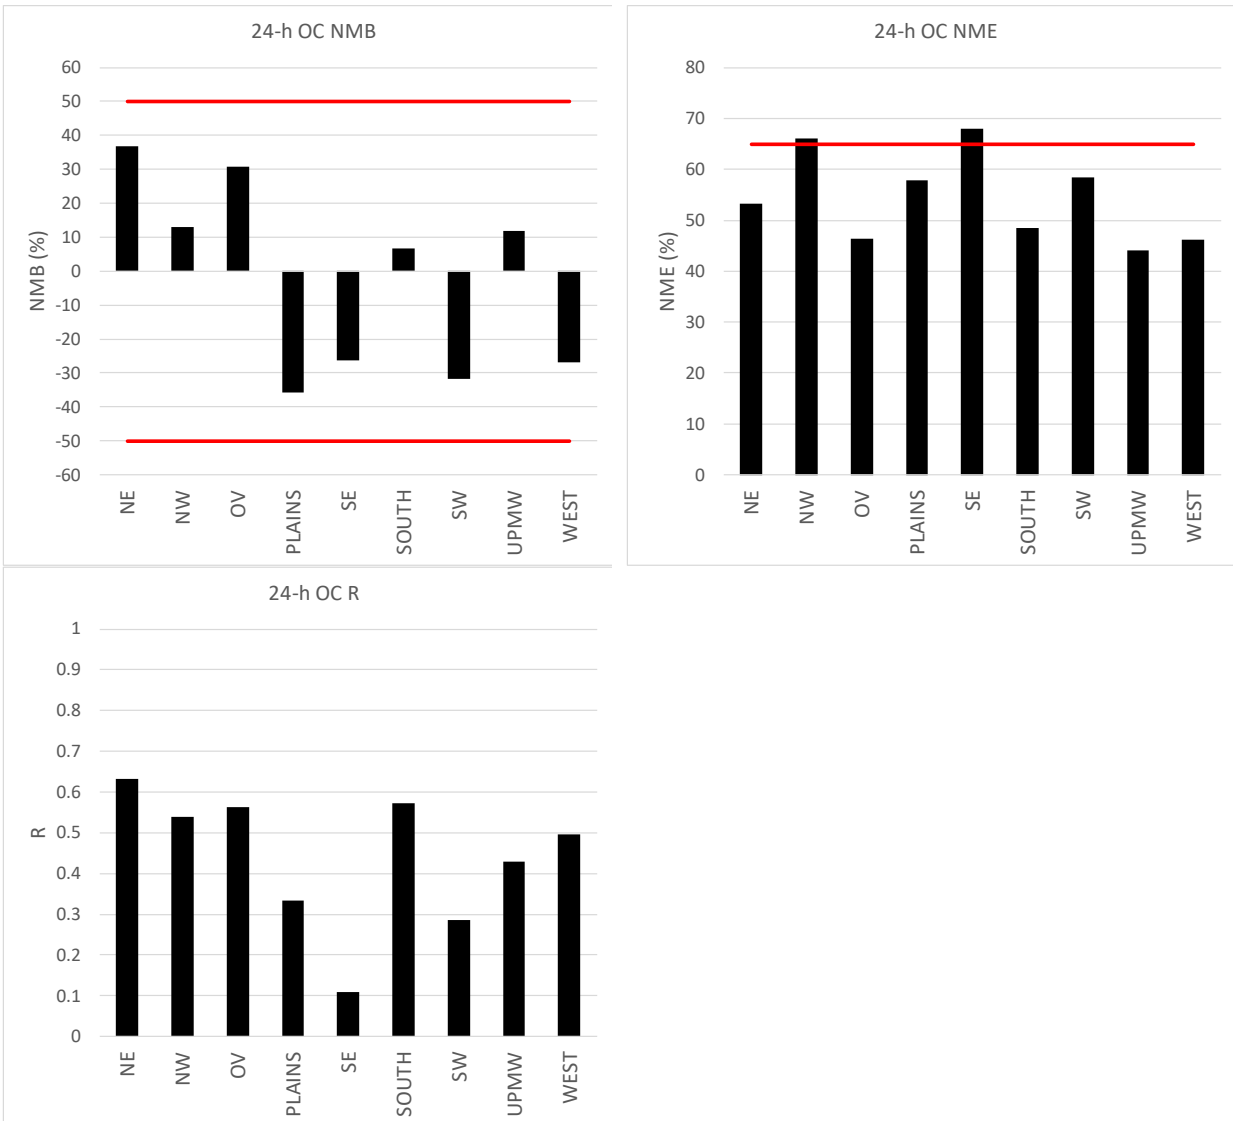

**Figure S11. Statistical model performance (NMB, NME, r) in replicating 24-h particulate organic carbon over the April-September, 2016 warm season by US climate zone. Criteria benchmarks are shown as red lines.**

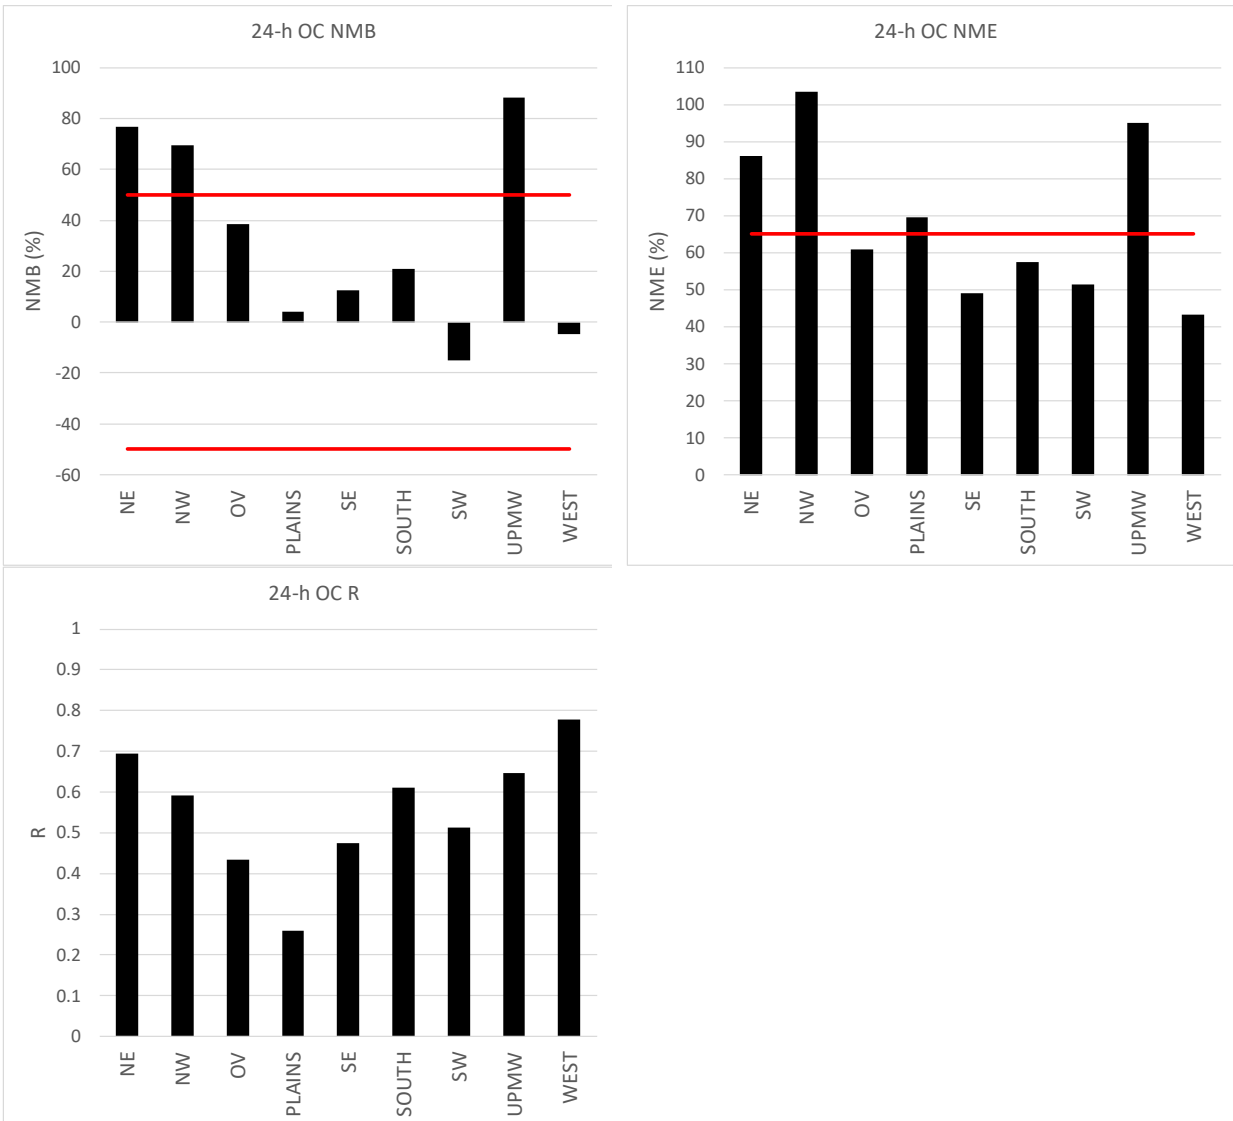

**Figure S12. Statistical model performance (NMB, NME, r) in replicating 24-h particulate organic carbon over the combined January-March and October-December, 2016 cool seasons by US climate zone. Criteria benchmarks are shown as red lines.**



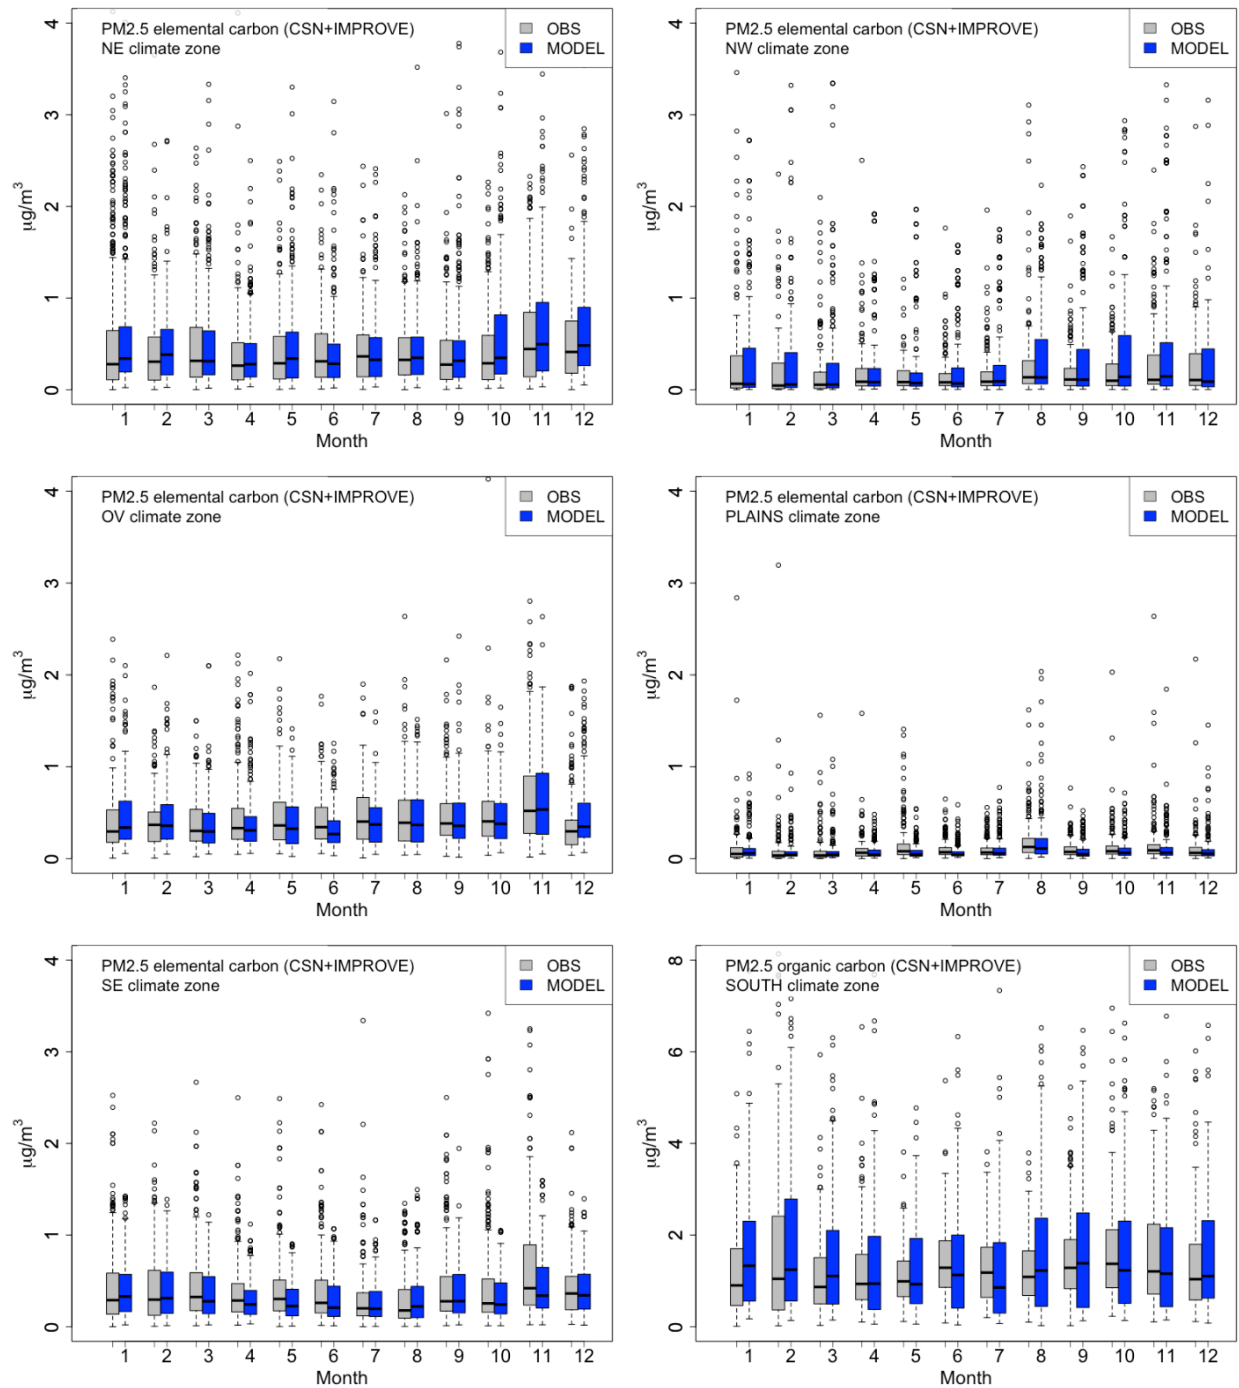

Figure S13. Monthly comparison between 2016 observed (grey) and simulated (blue) 24-h particulate elemental carbon concentration for each of the nine NOAA climate regions shown in Figure 12. Boxes represent the interquartile range (25<sup>th</sup> to 75<sup>th</sup> percentile with median shown by the center line), dashed whiskers represent 1.5 times the interquartile range, and circles represent individual outlier values.

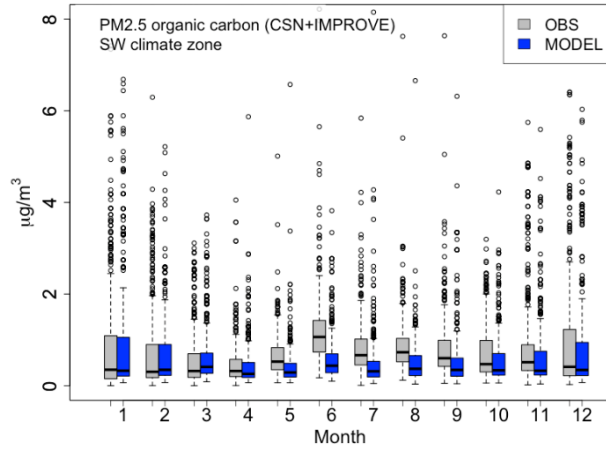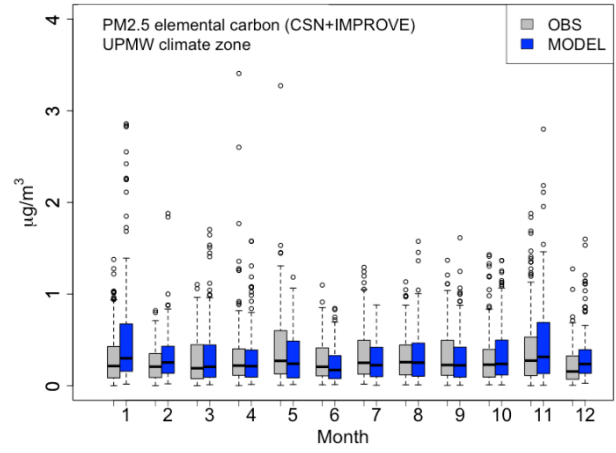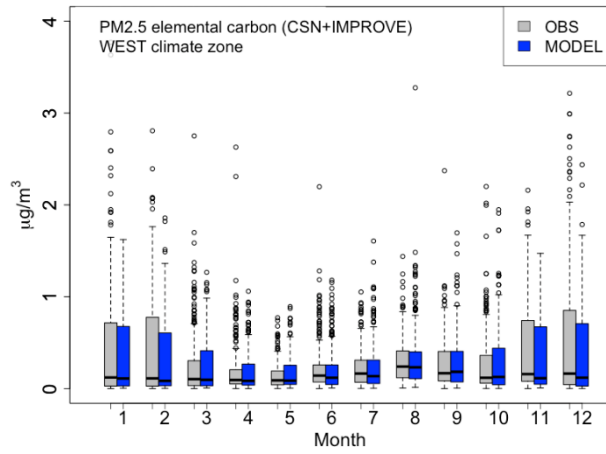

Figure S13 (Concluded).

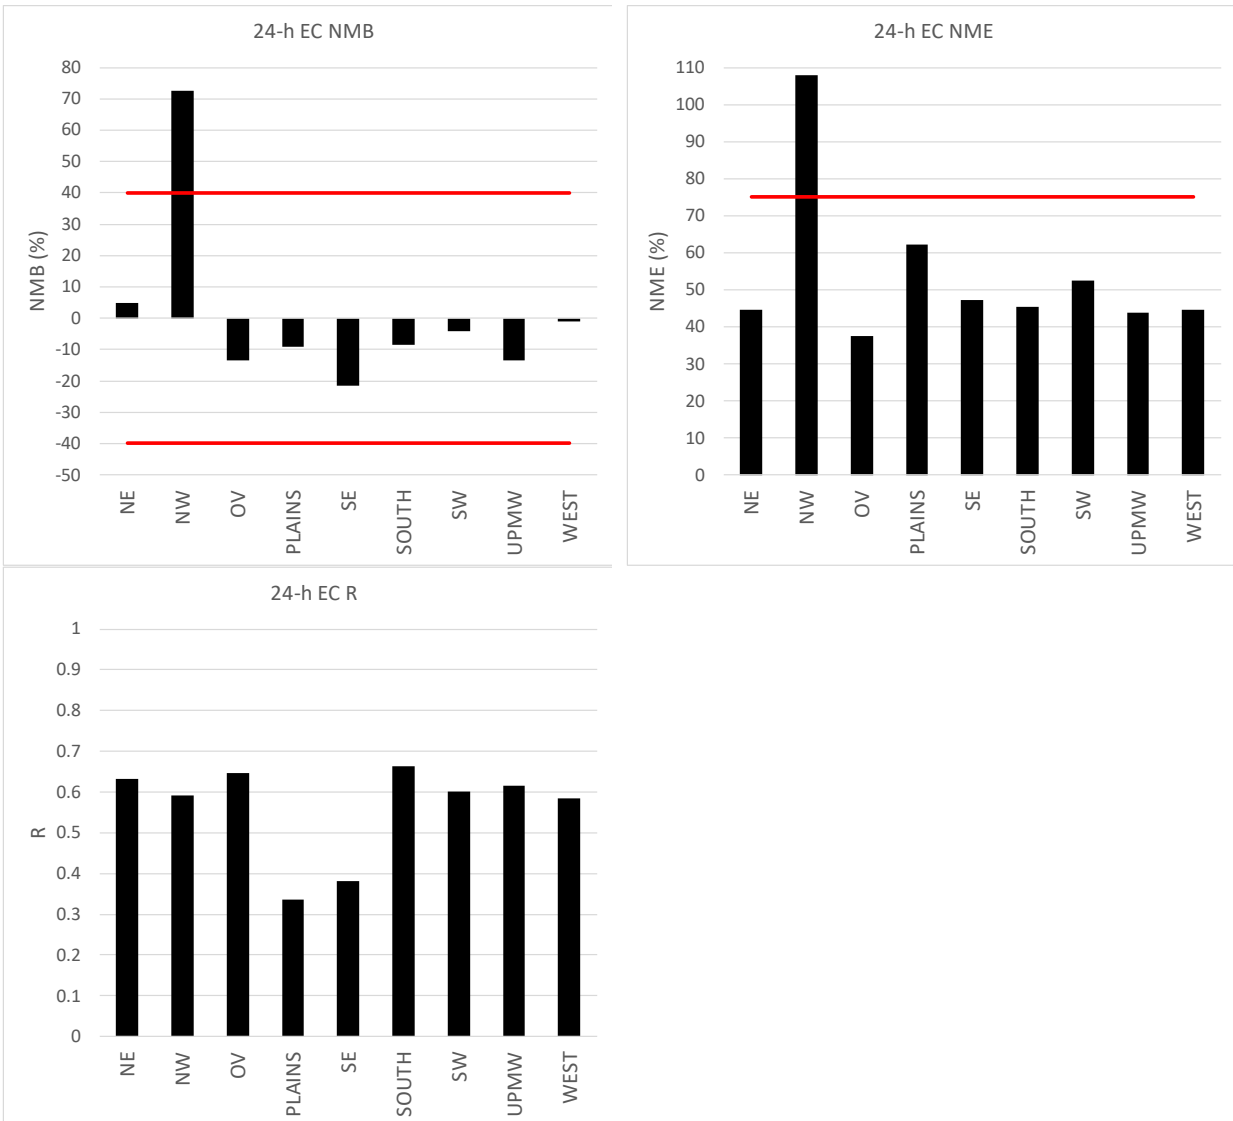

**Figure S14. Statistical model performance (NMB, NME, r) in replicating 24-h particulate elemental carbon over the April-September, 2016 warm season by US climate zone. Criteria benchmarks are shown as red lines.**

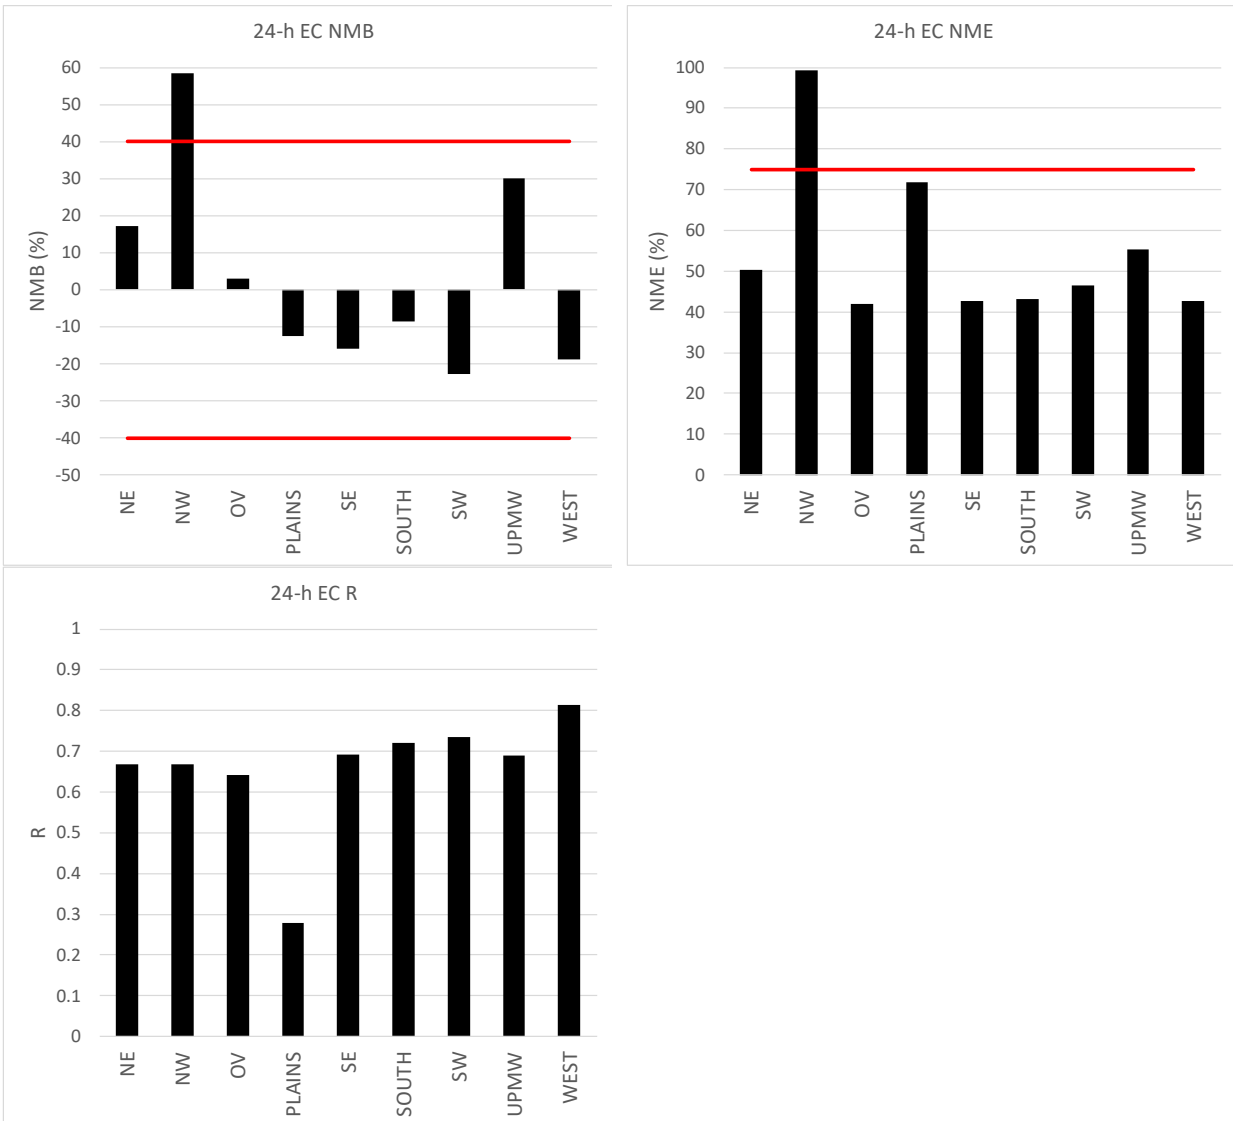

**Figure S15. Statistical model performance (NMB, NME, r) in replicating 24-h particulate elemental carbon over the combined January-March and October-December, 2016 cool seasons by US climate zone. Criteria benchmarks are shown as red lines.**

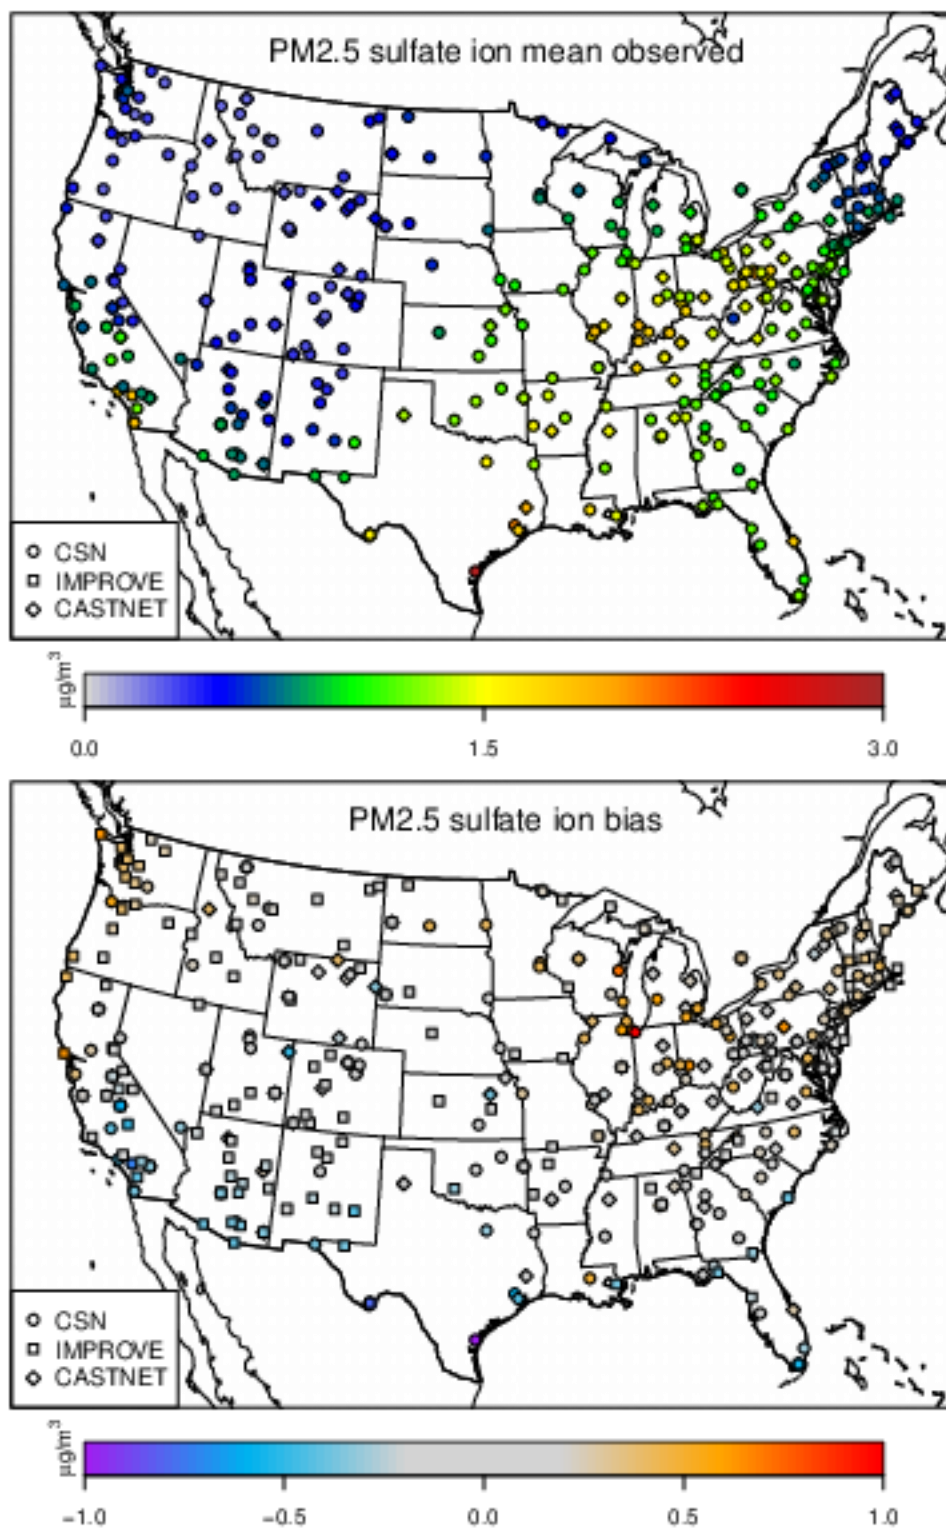

Figure S16. Observed April-September average sulfate concentrations ( $\mu\text{g}/\text{m}^3$ ) at AMON sites (top) and simulated mean bias (MB,  $\mu\text{g}/\text{m}^3$ ) with the bidirectional scheme (bottom).

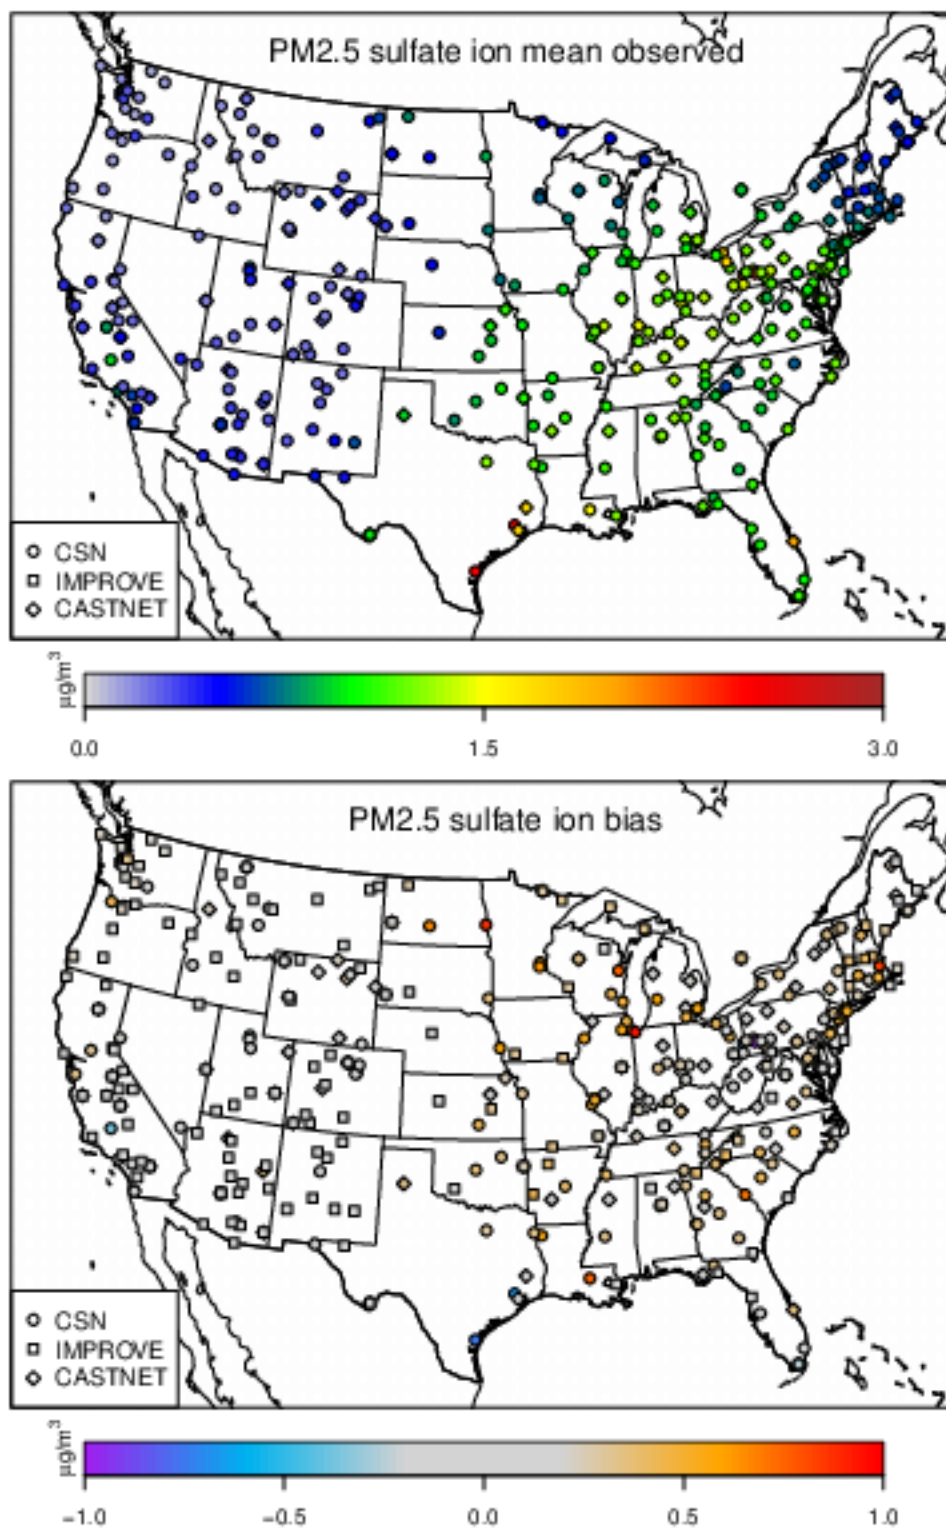

Figure S17. Observed October-March average sulfate concentrations ( $\mu\text{g}/\text{m}^3$ ) at AMON sites (top) and simulated mean bias (MB,  $\mu\text{g}/\text{m}^3$ ) with the bidirectional scheme (bottom).

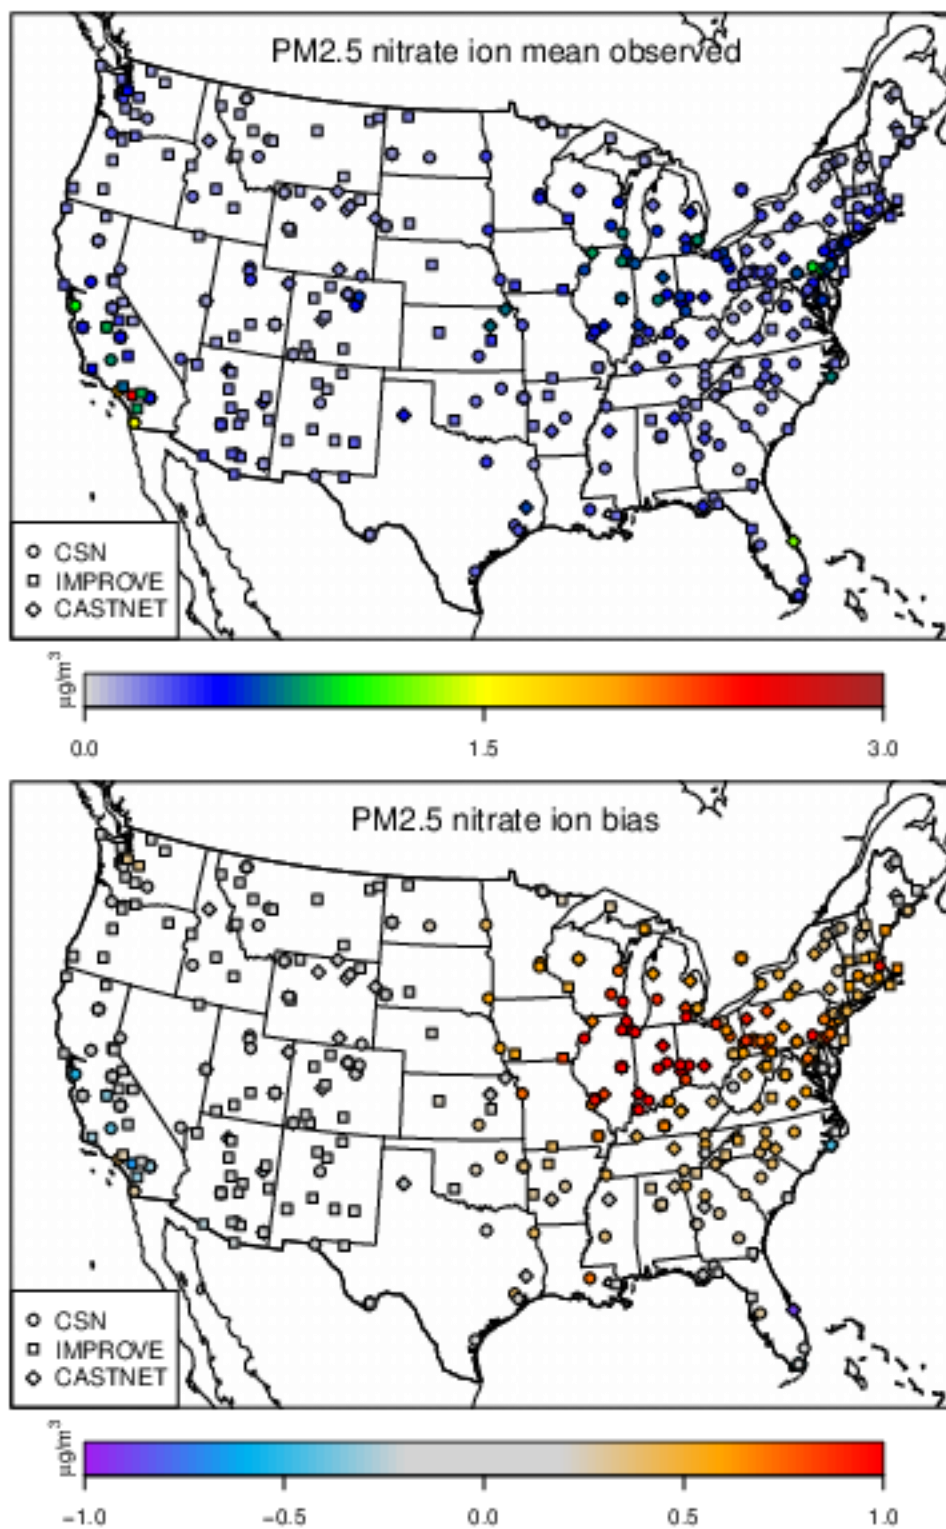

Figure S18. Observed April-September average nitrate concentrations ( $\mu\text{g}/\text{m}^3$ ) at AMON sites (top) and simulated mean bias (MB,  $\mu\text{g}/\text{m}^3$ ) with the bidirectional scheme (bottom).

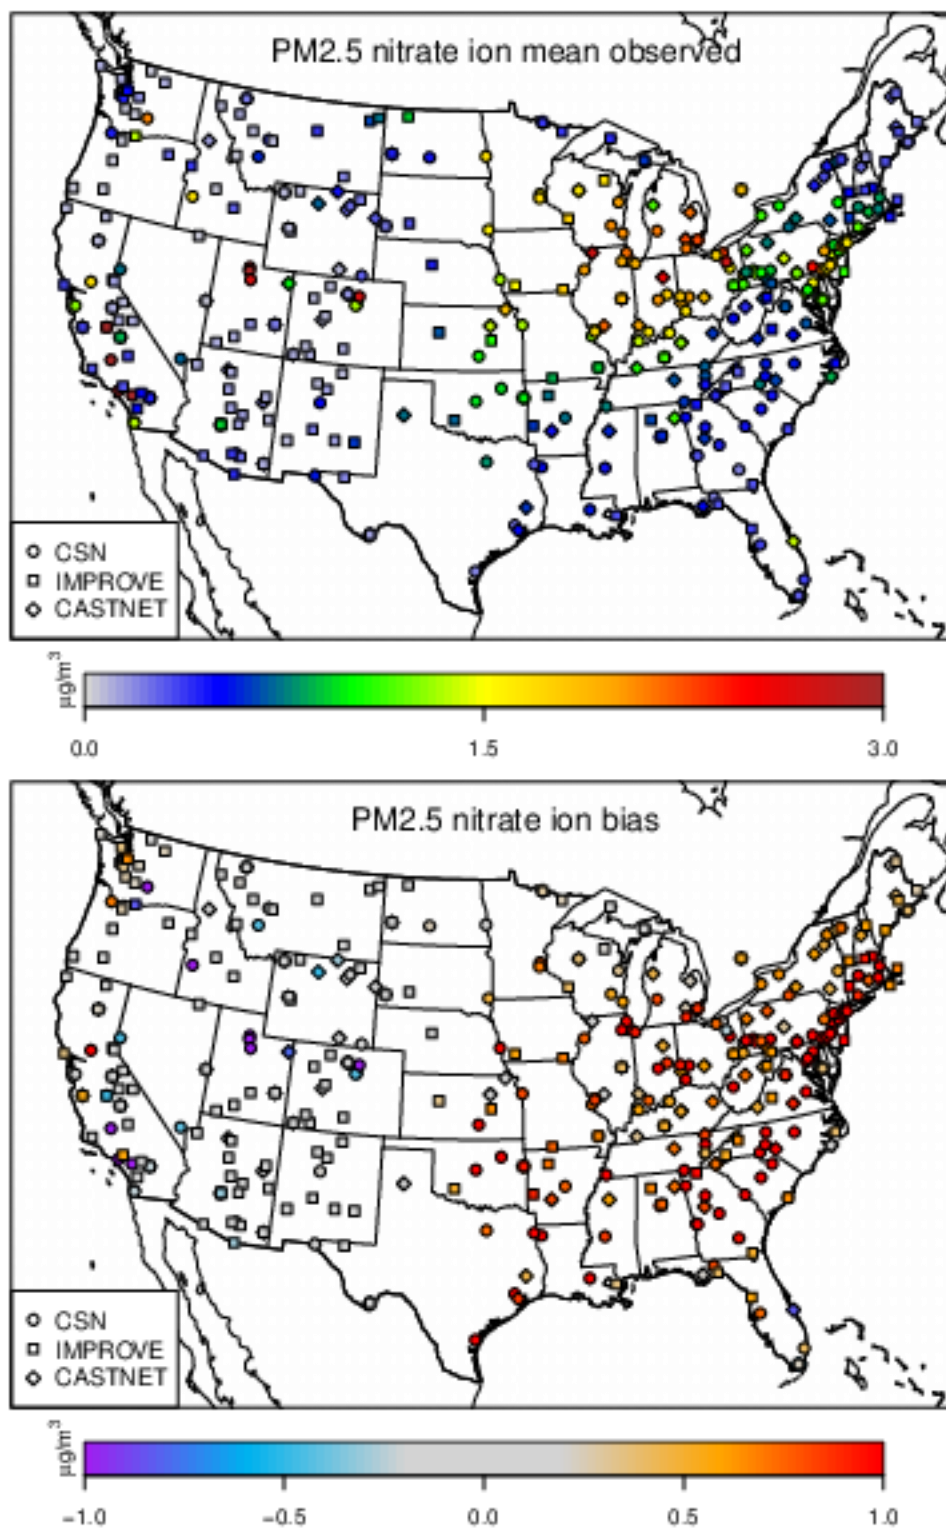

Figure S19. Observed October-March average nitrate concentrations ( $\mu\text{g}/\text{m}^3$ ) at AMON sites (top) and simulated mean bias (MB,  $\mu\text{g}/\text{m}^3$ ) with the bidirectional scheme (bottom).



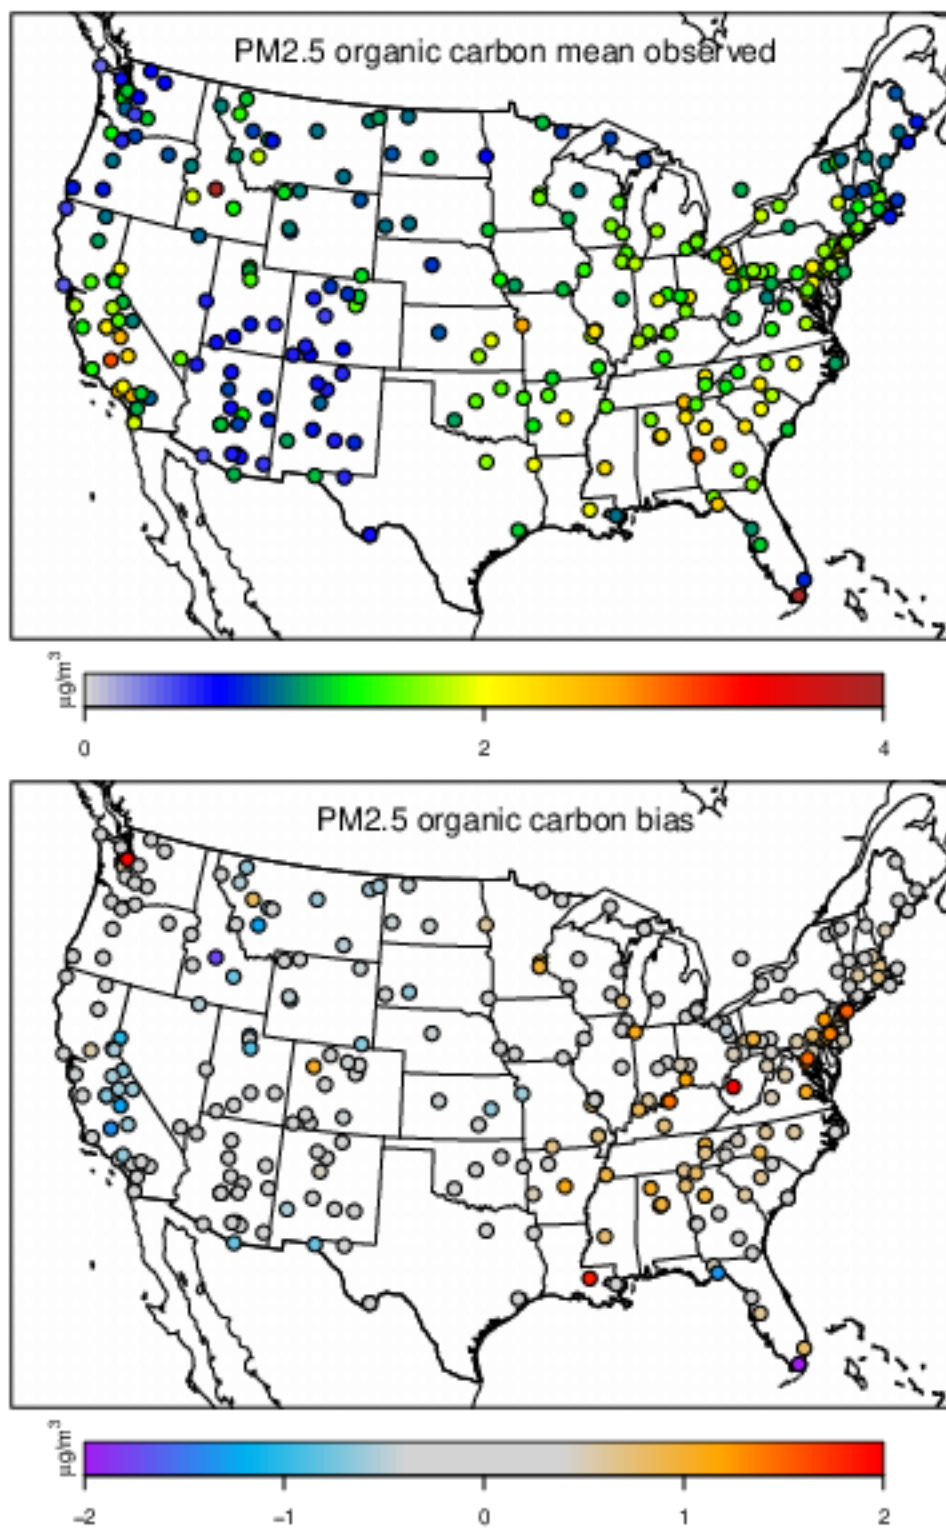

Figure S20. Observed April-September average organic carbon concentrations ( $\mu\text{g}/\text{m}^3$ ) at AMON sites (top) and simulated mean bias (MB,  $\mu\text{g}/\text{m}^3$ ) with the bidirectional scheme (bottom).

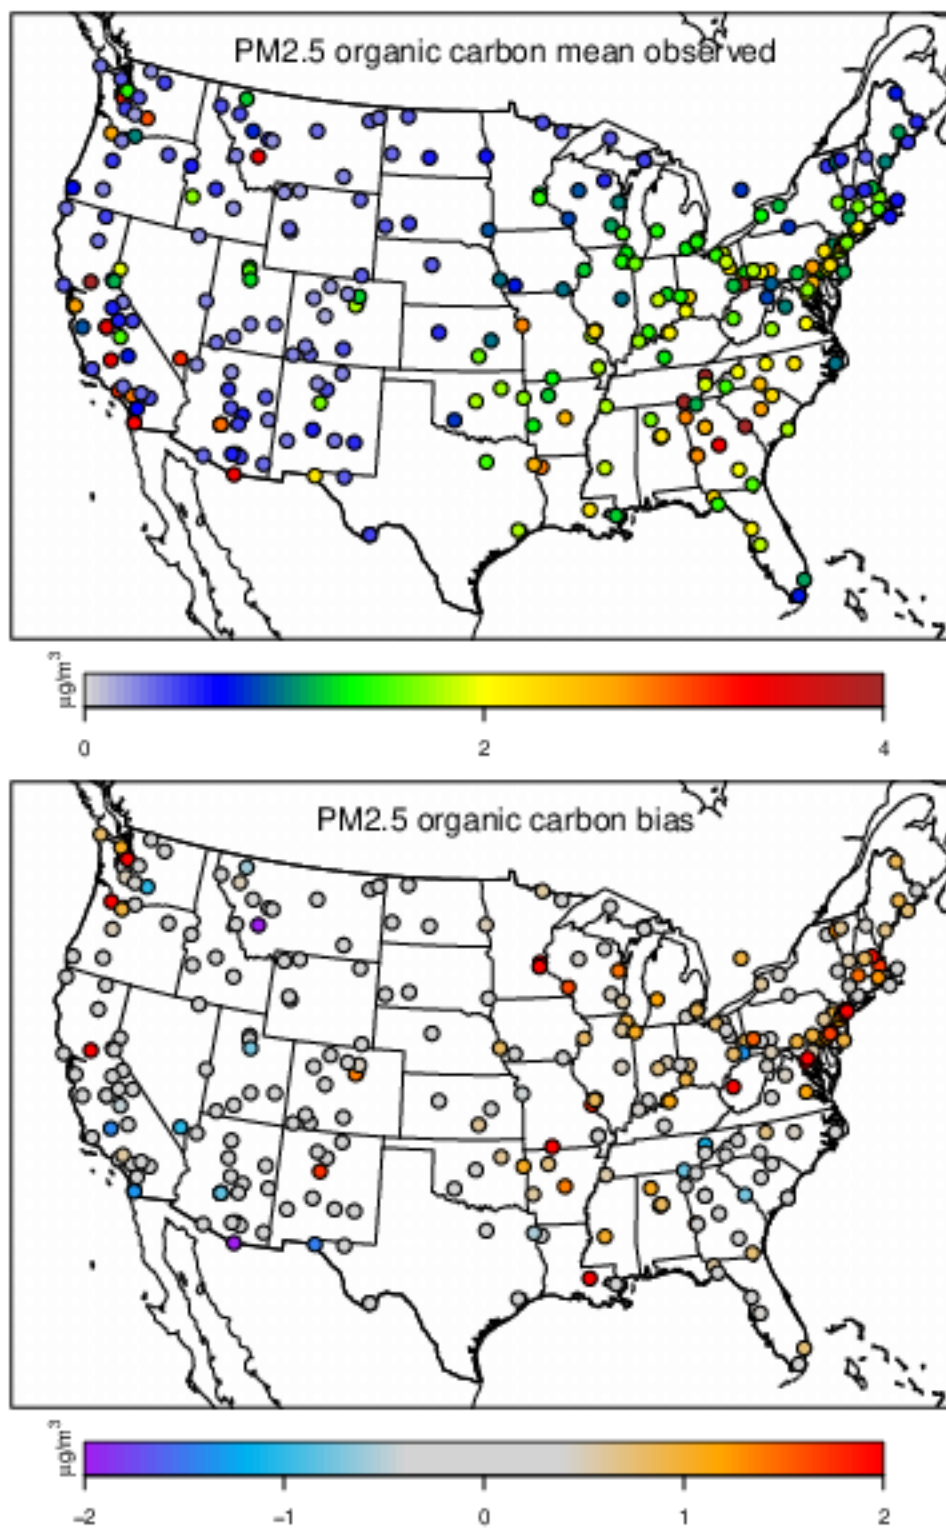

Figure S21. Observed October-March average organic carbon concentrations ( $\mu\text{g}/\text{m}^3$ ) at AMON sites (top) and simulated mean bias (MB,  $\mu\text{g}/\text{m}^3$ ) with the bidirectional scheme (bottom).

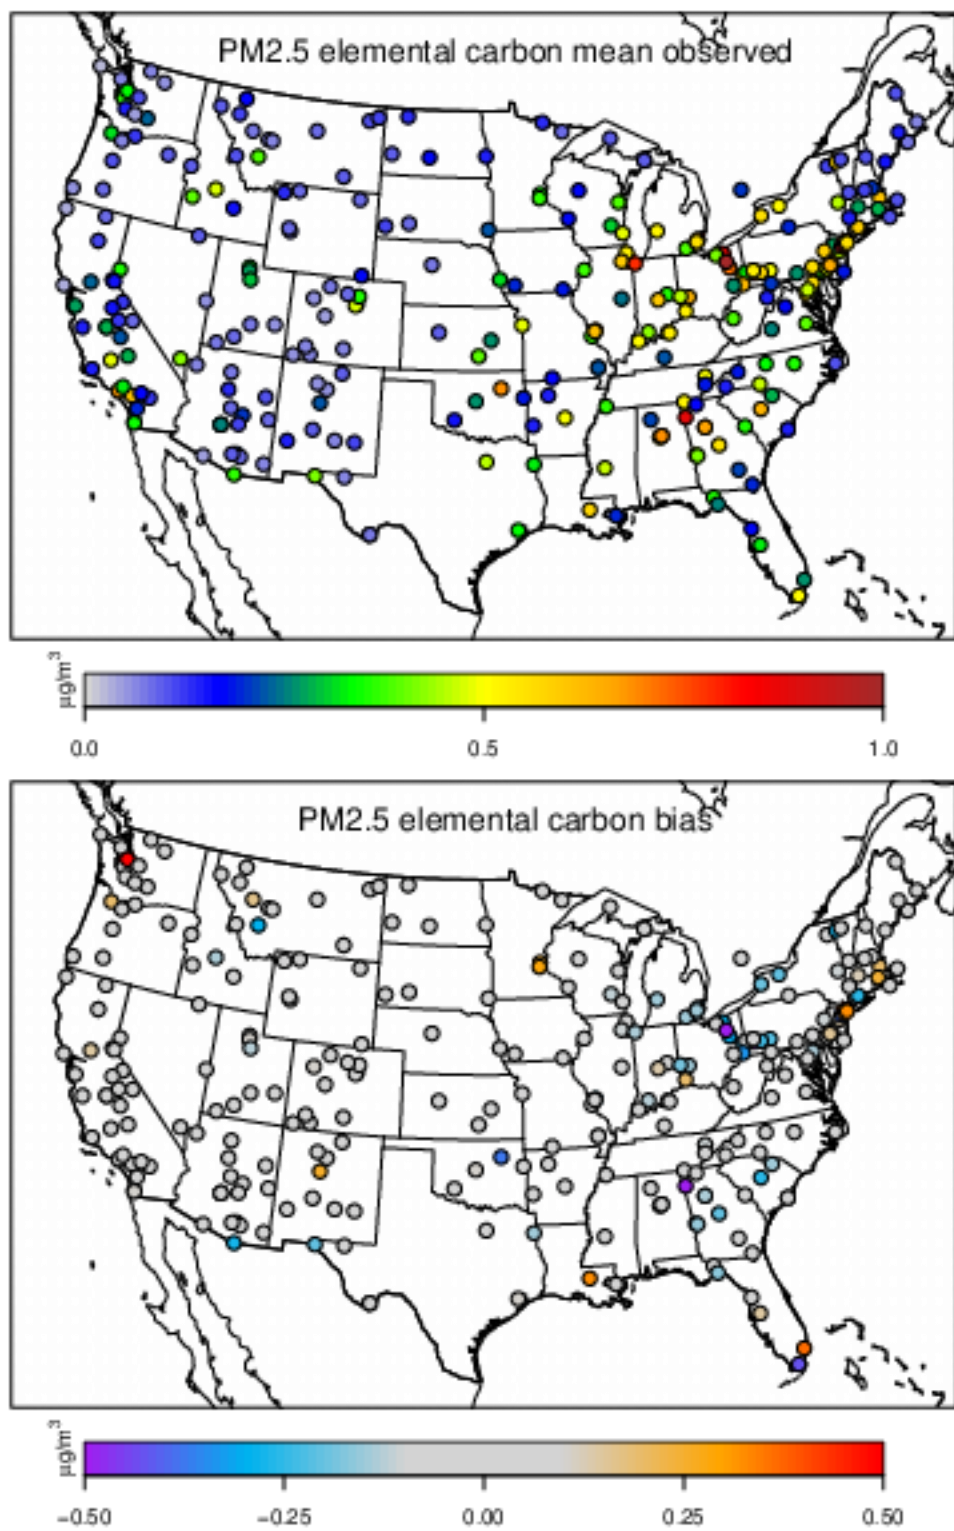

Figure S22. Observed April-September average elemental carbon concentrations ( $\mu\text{g}/\text{m}^3$ ) at AMON sites (top) and simulated mean bias (MB,  $\mu\text{g}/\text{m}^3$ ) with the bidirectional scheme (bottom).

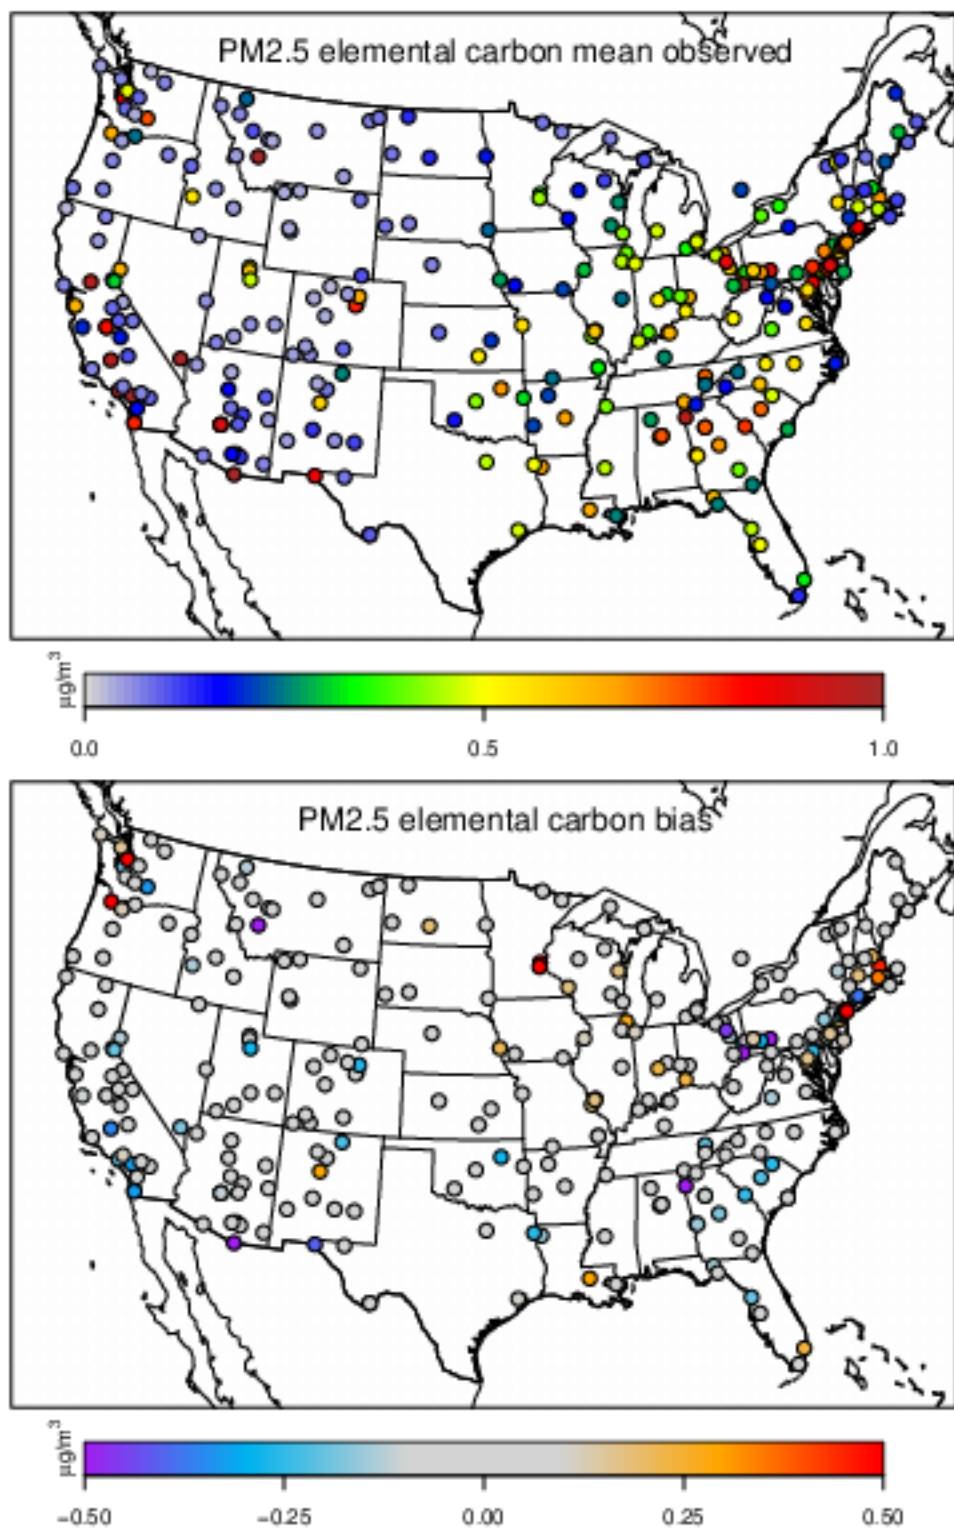

Figure S23. Observed October-March average elemental carbon concentrations ( $\mu\text{g}/\text{m}^3$ ) at AMON sites (top) and simulated mean bias (MB,  $\mu\text{g}/\text{m}^3$ ) with the bidirectional scheme (bottom).

## CB6r2 Gas-Phase Chemistry

**Table S1.** Reactions and rate constant expressions for the CB6r2 mechanism. See Table S2 for species names.  $k_{298}$  is the rate constant at 298 K and 1 atmosphere using units in  $\text{cm}^3 \text{molecule}^{-1} \text{s}^{-1}$ . For photolysis reactions  $k_{298}$  shows the photolysis rate at a solar zenith angle of  $60^\circ$  and height of 600 m MSL/AGL.

| Number | Reactants and Products                                                  | Rate Constant Expression                                                                                             | $k_{298}$ |
|--------|-------------------------------------------------------------------------|----------------------------------------------------------------------------------------------------------------------|-----------|
| 1      | $\text{NO}_2 = \text{NO} + \text{O}$                                    | Photolysis                                                                                                           | 6.30E-3   |
| 2      | $\text{O} + \text{O}_2 + \text{M} = \text{O}_3 + \text{M}$              | $k = 5.68\text{E-}34 (T/300)^{-2.6}$                                                                                 | 5.78E-34  |
| 3      | $\text{O}_3 + \text{NO} = \text{NO}_2$                                  | $k = 1.40\text{E-}12 \exp(-1310/T)$                                                                                  | 1.73E-14  |
| 4      | $\text{O} + \text{NO} + \text{M} = \text{NO}_2 + \text{M}$              | $k = 1.00\text{E-}31 (T/300)^{-1.6}$                                                                                 | 1.01E-31  |
| 5      | $\text{O} + \text{NO}_2 = \text{NO}$                                    | $k = 5.50\text{E-}12 \exp(188/T)$                                                                                    | 1.03E-11  |
| 6      | $\text{O} + \text{NO}_2 = \text{NO}_3$                                  | Falloff: $F=0.6; n=1$<br>$k(0) = 1.30\text{E-}31 (T/300)^{-1.5}$<br>$k(\text{inf}) = 2.30\text{E-}11 (T/300)^{0.24}$ | 2.11E-12  |
| 7      | $\text{O} + \text{O}_3 =$                                               | $k = 8.00\text{E-}12 \exp(-2060/T)$                                                                                  | 7.96E-15  |
| 8      | $\text{O}_3 = \text{O}$                                                 | Photolysis                                                                                                           | 3.33E-4   |
| 9      | $\text{O}_3 = \text{O}_1\text{D}$                                       | Photolysis                                                                                                           | 8.78E-6   |
| 10     | $\text{O}_1\text{D} + \text{M} = \text{O} + \text{M}$                   | $k = 2.23\text{E-}11 \exp(115/T)$                                                                                    | 3.28E-11  |
| 11     | $\text{O}_1\text{D} + \text{H}_2\text{O} = 2 \text{OH}$                 | $k = 2.14\text{E-}10$                                                                                                | 2.14E-10  |
| 12     | $\text{O}_3 + \text{OH} = \text{HO}_2$                                  | $k = 1.70\text{E-}12 \exp(-940/T)$                                                                                   | 7.25E-14  |
| 13     | $\text{O}_3 + \text{HO}_2 = \text{OH}$                                  | $k = 2.03\text{E-}16 (T/300)^{4.57} \exp(693/T)$                                                                     | 2.01E-15  |
| 14     | $\text{OH} + \text{O} = \text{HO}_2$                                    | $k = 2.40\text{E-}11 \exp(110/T)$                                                                                    | 3.47E-11  |
| 15     | $\text{HO}_2 + \text{O} = \text{OH}$                                    | $k = 2.70\text{E-}11 \exp(224/T)$                                                                                    | 5.73E-11  |
| 16     | $\text{OH} + \text{OH} = \text{O}$                                      | $k = 6.20\text{E-}14 (T/298)^{2.6} \exp(945/T)$                                                                      | 1.48E-12  |
| 17     | $\text{OH} + \text{OH} = \text{H}_2\text{O}_2$                          | Falloff: $F=0.5; n=1.13$<br>$k(0) = 6.90\text{E-}31 (T/300)^{-0.8}$<br>$k(\text{inf}) = 2.60\text{E-}11$             | 5.25E-12  |
| 18     | $\text{OH} + \text{HO}_2 =$                                             | $k = 4.80\text{E-}11 \exp(250/T)$                                                                                    | 1.11E-10  |
| 19     | $\text{HO}_2 + \text{HO}_2 = \text{H}_2\text{O}_2$                      | $k = k_1 + k_2 [\text{M}]$<br>$k_1 = 2.20\text{E-}13 \exp(600/T)$<br>$k_2 = 1.90\text{E-}33 \exp(980/T)$             | 2.90E-12  |
| 20     | $\text{HO}_2 + \text{HO}_2 + \text{H}_2\text{O} = \text{H}_2\text{O}_2$ | $k = k_1 + k_2 [\text{M}]$<br>$k_1 = 3.08\text{E-}34 \exp(2800/T)$<br>$k_2 = 2.66\text{E-}54 \exp(3180/T)$           | 6.53E-30  |
| 21     | $\text{H}_2\text{O}_2 = 2 \text{OH}$                                    | Photolysis                                                                                                           | 3.78E-6   |
| 22     | $\text{H}_2\text{O}_2 + \text{OH} = \text{HO}_2$                        | $k = 2.90\text{E-}12 \exp(-160/T)$                                                                                   | 1.70E-12  |
| 23     | $\text{H}_2\text{O}_2 + \text{O} = \text{OH} + \text{HO}_2$             | $k = 1.40\text{E-}12 \exp(-2000/T)$                                                                                  | 1.70E-15  |
| 24     | $\text{NO} + \text{NO} + \text{O}_2 = 2 \text{NO}_2$                    | $k = 3.30\text{E-}39 \exp(530/T)$                                                                                    | 1.95E-38  |
| 25     | $\text{HO}_2 + \text{NO} = \text{OH} + \text{NO}_2$                     | $k = 3.45\text{E-}12 \exp(270/T)$                                                                                    | 8.54E-12  |
| 26     | $\text{NO}_2 + \text{O}_3 = \text{NO}_3$                                | $k = 1.40\text{E-}13 \exp(-2470/T)$                                                                                  | 3.52E-17  |
| 27     | $\text{NO}_3 = \text{NO}_2 + \text{O}$                                  | Photolysis                                                                                                           | 1.56E-1   |
| 28     | $\text{NO}_3 = \text{NO}$                                               | Photolysis                                                                                                           | 1.98E-2   |
| 29     | $\text{NO}_3 + \text{NO} = 2 \text{NO}_2$                               | $k = 1.80\text{E-}11 \exp(110/T)$                                                                                    | 2.60E-11  |
| 30     | $\text{NO}_3 + \text{NO}_2 = \text{NO} + \text{NO}_2$                   | $k = 4.50\text{E-}14 \exp(-1260/T)$                                                                                  | 6.56E-16  |
| 31     | $\text{NO}_3 + \text{O} = \text{NO}_2$                                  | $k = 1.70\text{E-}11$                                                                                                | 1.70E-11  |
| 32     | $\text{NO}_3 + \text{OH} = \text{HO}_2 + \text{NO}_2$                   | $k = 2.00\text{E-}11$                                                                                                | 2.00E-11  |
| 33     | $\text{NO}_3 + \text{HO}_2 = \text{OH} + \text{NO}_2$                   | $k = 4.00\text{E-}12$                                                                                                | 4.00E-12  |
| 34     | $\text{NO}_3 + \text{O}_3 = \text{NO}_2$                                | $k = 1.00\text{E-}17$                                                                                                | 1.00E-17  |
| 35     | $\text{NO}_3 + \text{NO}_3 = 2 \text{NO}_2$                             | $k = 8.50\text{E-}13 \exp(-2450/T)$                                                                                  | 2.28E-16  |

| Number | Reactants and Products                                                                                                                                 | Rate Constant Expression                                                                                                                                                                                       | k <sub>298</sub> |
|--------|--------------------------------------------------------------------------------------------------------------------------------------------------------|----------------------------------------------------------------------------------------------------------------------------------------------------------------------------------------------------------------|------------------|
| 36     | NO <sub>3</sub> + NO <sub>2</sub> = N <sub>2</sub> O <sub>5</sub>                                                                                      | Falloff: F=0.35; n=1.33<br>k(0) = 3.60E-30 (T/300) <sup>-4.1</sup><br>k(inf) = 1.90E-12 (T/300) <sup>0.2</sup>                                                                                                 | 1.24E-12         |
| 37     | N <sub>2</sub> O <sub>5</sub> = NO <sub>3</sub> + NO <sub>2</sub>                                                                                      | Falloff: F=0.35; n=1.33<br>k(0) = 1.30E-3 (T/300) <sup>-3.5</sup> exp(-11000/T)<br>k(inf) = 9.70E+14 (T/300) <sup>0.1</sup> exp(-11080/T)                                                                      | 4.46E-2          |
| 38     | N <sub>2</sub> O <sub>5</sub> = NO <sub>2</sub> + NO <sub>3</sub>                                                                                      | Photolysis                                                                                                                                                                                                     | 2.52E-5          |
| 39     | N <sub>2</sub> O <sub>5</sub> + H <sub>2</sub> O = 2 HNO <sub>3</sub>                                                                                  | k = 1.00E-22                                                                                                                                                                                                   | 1.00E-22         |
| 40     | NO + OH = HONO                                                                                                                                         | Falloff: F=0.81; n=0.87<br>k(0) = 7.40E-31 (T/300) <sup>-2.4</sup><br>k(inf) = 3.30E-11 (T/300) <sup>-0.3</sup>                                                                                                | 9.77E-12         |
| 41     | NO + NO <sub>2</sub> + H <sub>2</sub> O = 2 HONO                                                                                                       | k = 5.00E-40                                                                                                                                                                                                   | 5.00E-40         |
| 42     | HONO + HONO = NO + NO <sub>2</sub>                                                                                                                     | k = 1.00E-20                                                                                                                                                                                                   | 1.00E-20         |
| 43     | HONO = NO + OH                                                                                                                                         | Photolysis                                                                                                                                                                                                     | 1.04E-3          |
| 44     | HONO + OH = NO <sub>2</sub>                                                                                                                            | k = 2.50E-12 exp(260/T)                                                                                                                                                                                        | 5.98E-12         |
| 45     | NO <sub>2</sub> + OH = HNO <sub>3</sub>                                                                                                                | Falloff: F=0.6; n=1<br>k(0) = 1.80E-30 (T/300) <sup>-3</sup><br>k(inf) = 2.80E-11                                                                                                                              | 1.06E-11         |
| 46     | HNO <sub>3</sub> + OH = NO <sub>3</sub>                                                                                                                | k = k <sub>1</sub> + k <sub>3</sub> [M] / (1 + k <sub>3</sub> [M] / k <sub>2</sub> )<br>k <sub>1</sub> = 2.40E-14 exp(460/T)<br>k <sub>2</sub> = 2.70E-17 exp(2199/T)<br>k <sub>3</sub> = 6.50E-34 exp(1335/T) | 1.54E-13         |
| 47     | HNO <sub>3</sub> = OH + NO <sub>2</sub>                                                                                                                | Photolysis                                                                                                                                                                                                     | 2.54E-7          |
| 48     | HO <sub>2</sub> + NO <sub>2</sub> = PNA                                                                                                                | Falloff: F=0.6; n=1<br>k(0) = 1.80E-31 (T/300) <sup>-3.2</sup><br>k(inf) = 4.70E-12                                                                                                                            | 1.38E-12         |
| 49     | PNA = HO <sub>2</sub> + NO <sub>2</sub>                                                                                                                | Falloff: F=0.6; n=1<br>k(0) = 4.10E-5 exp(-10650/T)<br>k(inf) = 4.80E+15 exp(-11170/T)                                                                                                                         | 8.31E-2          |
| 50     | PNA = 0.59 HO <sub>2</sub> + 0.59 NO <sub>2</sub> + 0.41 OH + 0.41 NO <sub>3</sub>                                                                     | Photolysis                                                                                                                                                                                                     | 2.36E-6          |
| 51     | PNA + OH = NO <sub>2</sub>                                                                                                                             | k = 3.20E-13 exp(690/T)                                                                                                                                                                                        | 3.24E-12         |
| 52     | SO <sub>2</sub> + OH = SULF + HO <sub>2</sub>                                                                                                          | Falloff: F=0.53; n=1.1<br>k(0) = 4.50E-31 (T/300) <sup>-3.9</sup><br>k(inf) = 1.30E-12 (T/300) <sup>-0.7</sup>                                                                                                 | 8.12E-13         |
| 53     | C <sub>2</sub> O <sub>3</sub> + NO = NO <sub>2</sub> + MEO <sub>2</sub> + RO <sub>2</sub>                                                              | k = 7.50E-12 exp(290/T)                                                                                                                                                                                        | 1.98E-11         |
| 54     | C <sub>2</sub> O <sub>3</sub> + NO <sub>2</sub> = PAN                                                                                                  | Falloff: F=0.3; n=1.41<br>k(0) = 2.70E-28 (T/300) <sup>-7.1</sup><br>k(inf) = 1.20E-11 (T/300) <sup>-0.9</sup>                                                                                                 | 9.40E-12         |
| 55     | PAN = NO <sub>2</sub> + C <sub>2</sub> O <sub>3</sub>                                                                                                  | Falloff: F=0.3; n=1.41<br>k(0) = 4.90E-3 exp(-12100/T)<br>k(inf) = 5.40E+16 exp(-13830/T)                                                                                                                      | 2.98E-4          |
| 56     | PAN = 0.6 NO <sub>2</sub> + 0.6 C <sub>2</sub> O <sub>3</sub> + 0.4 NO <sub>3</sub> + 0.4 MEO <sub>2</sub> + 0.4 RO <sub>2</sub>                       | Photolysis                                                                                                                                                                                                     | 3.47E-7          |
| 57     | C <sub>2</sub> O <sub>3</sub> + HO <sub>2</sub> = 0.41 PACD + 0.15 AACD + 0.15 O <sub>3</sub> + 0.44 MEO <sub>2</sub> + 0.44 RO <sub>2</sub> + 0.44 OH | k = 5.20E-13 exp(980/T)                                                                                                                                                                                        | 1.39E-11         |
| 58     | C <sub>2</sub> O <sub>3</sub> + RO <sub>2</sub> = C <sub>2</sub> O <sub>3</sub>                                                                        | k = 8.90E-13 exp(800/T)                                                                                                                                                                                        | 1.30E-11         |
| 59     | C <sub>2</sub> O <sub>3</sub> + C <sub>2</sub> O <sub>3</sub> = 2 MEO <sub>2</sub> + 2 RO <sub>2</sub>                                                 | k = 2.90E-12 exp(500/T)                                                                                                                                                                                        | 1.55E-11         |
| 60     | C <sub>2</sub> O <sub>3</sub> + CXO <sub>3</sub> = MEO <sub>2</sub> + ALD <sub>2</sub> + XO <sub>2</sub> H + 2 RO <sub>2</sub>                         | k = 2.90E-12 exp(500/T)                                                                                                                                                                                        | 1.55E-11         |
| 61     | CXO <sub>3</sub> + NO = NO <sub>2</sub> + ALD <sub>2</sub> + XO <sub>2</sub> H + RO <sub>2</sub>                                                       | k = 6.70E-12 exp(340/T)                                                                                                                                                                                        | 2.10E-11         |

| Number | Reactants and Products                                                                    | Rate Constant Expression                      | k <sub>298</sub> |
|--------|-------------------------------------------------------------------------------------------|-----------------------------------------------|------------------|
| 62     | CXO3 + NO2 = PANX                                                                         | k = k(ref)/K<br>k(ref) = k(54)<br>K = 1.00E+0 | 9.40E-12         |
| 63     | PANX = NO2 + CXO3                                                                         | k = k(ref)/K<br>k(ref) = k(55)<br>K = 1.00E+0 | 2.98E-4          |
| 64     | PANX = 0.6 NO2 + 0.6 CXO3 + 0.4 NO3 + 0.4 ALD2 + 0.4 XO2H + 0.4 RO2                       | Photolysis                                    | 3.47E-7          |
| 65     | CXO3 + HO2 = 0.41 PACD + 0.15 AACD + 0.15 O3 + 0.44 ALD2 + 0.44 XO2H + 0.44 RO2 + 0.44 OH | k = 5.20E-13 exp(980/T)                       | 1.39E-11         |
| 66     | CXO3 + RO2 = 0.8 ALD2 + 0.8 XO2H + 0.8 RO2                                                | k = 8.90E-13 exp(800/T)                       | 1.30E-11         |
| 67     | CXO3 + CXO3 = 2 ALD2 + 2 XO2H + 2 RO2                                                     | k = 3.20E-12 exp(500/T)                       | 1.71E-11         |
| 68     | RO2 + NO = NO                                                                             | k = 2.40E-12 exp(360/T)                       | 8.03E-12         |
| 69     | RO2 + HO2 = HO2                                                                           | k = 4.80E-13 exp(800/T)                       | 7.03E-12         |
| 70     | RO2 + RO2 =                                                                               | k = 6.50E-14 exp(500/T)                       | 3.48E-13         |
| 71     | MEO2 + NO = FORM + HO2 + NO2                                                              | k = 2.30E-12 exp(360/T)                       | 7.70E-12         |
| 72     | MEO2 + HO2 = 0.9 MEPX + 0.1 FORM                                                          | k = 3.80E-13 exp(780/T)                       | 5.21E-12         |
| 73     | MEO2 + C2O3 = FORM + 0.9 HO2 + 0.9 MEO2 + 0.1 AACD + 0.9 RO2                              | k = 2.00E-12 exp(500/T)                       | 1.07E-11         |
| 74     | MEO2 + RO2 = 0.685 FORM + 0.315 MEOH + 0.37 HO2 + RO2                                     | k = k(ref)/K<br>k(ref) = k(70)<br>K = 1.00E+0 | 3.48E-13         |
| 75     | XO2H + NO = NO2 + HO2                                                                     | k = 2.70E-12 exp(360/T)                       | 9.04E-12         |
| 76     | XO2H + HO2 = ROOH                                                                         | k = 6.80E-13 exp(800/T)                       | 9.96E-12         |
| 77     | XO2H + C2O3 = 0.8 HO2 + 0.8 MEO2 + 0.2 AACD + 0.8 RO2                                     | k = k(ref)/K<br>k(ref) = k(58)<br>K = 1.00E+0 | 1.30E-11         |
| 78     | XO2H + RO2 = 0.6 HO2 + RO2                                                                | k = k(ref)/K<br>k(ref) = k(70)<br>K = 1.00E+0 | 3.48E-13         |
| 79     | XO2 + NO = NO2                                                                            | k = k(ref)/K<br>k(ref) = k(75)<br>K = 1.00E+0 | 9.04E-12         |
| 80     | XO2 + HO2 = ROOH                                                                          | k = k(ref)/K<br>k(ref) = k(76)<br>K = 1.00E+0 | 9.96E-12         |
| 81     | XO2 + C2O3 = 0.8 MEO2 + 0.2 AACD + 0.8 RO2                                                | k = k(ref)/K<br>k(ref) = k(58)<br>K = 1.00E+0 | 1.30E-11         |
| 82     | XO2 + RO2 = RO2                                                                           | k = k(ref)/K<br>k(ref) = k(70)<br>K = 1.00E+0 | 3.48E-13         |
| 83     | XO2N + NO = 0.5 NTR1 + 0.5 NTR2                                                           | k = k(ref)/K<br>k(ref) = k(75)<br>K = 1.00E+0 | 9.04E-12         |
| 84     | XO2N + HO2 = ROOH                                                                         | k = k(ref)/K<br>k(ref) = k(76)<br>K = 1.00E+0 | 9.96E-12         |

| Number | Reactants and Products                                                                                                            | Rate Constant Expression                      | k <sub>298</sub> |
|--------|-----------------------------------------------------------------------------------------------------------------------------------|-----------------------------------------------|------------------|
| 85     | XO <sub>2</sub> N + C <sub>2</sub> O <sub>3</sub> = 0.8 HO <sub>2</sub> + 0.8 MEO <sub>2</sub> + 0.2 AACD + 0.8 RO <sub>2</sub>   | k = k(ref)/K<br>k(ref) = k(58)<br>K = 1.00E+0 | 1.30E-11         |
| 86     | XO <sub>2</sub> N + RO <sub>2</sub> = RO <sub>2</sub>                                                                             | k = k(ref)/K<br>k(ref) = k(70)<br>K = 1.00E+0 | 3.48E-13         |
| 87     | MEPX + OH = 0.6 MEO <sub>2</sub> + 0.6 RO <sub>2</sub> + 0.4 FORM + 0.4 OH                                                        | k = 5.30E-12 exp(190/T)                       | 1.00E-11         |
| 88     | MEPX = MEO <sub>2</sub> + RO <sub>2</sub> + OH                                                                                    | Photolysis                                    | 2.68E-6          |
| 89     | ROOH + OH = 0.54 XO <sub>2</sub> H + 0.06 XO <sub>2</sub> N + 0.6 RO <sub>2</sub> + 0.4 OH                                        | k = 5.30E-12 exp(190/T)                       | 1.00E-11         |
| 90     | ROOH = HO <sub>2</sub> + OH                                                                                                       | Photolysis                                    | 2.68E-6          |
| 91     | NTR1 + OH = NTR2                                                                                                                  | k = 2.00E-12                                  | 2.00E-12         |
| 92     | NTR1 = NO <sub>2</sub>                                                                                                            | Photolysis                                    | 1.06E-6          |
| 93     | FACD + OH = HO <sub>2</sub>                                                                                                       | k = 4.50E-13                                  | 4.50E-13         |
| 94     | AACD + OH = MEO <sub>2</sub> + RO <sub>2</sub>                                                                                    | k = 4.00E-14 exp(850/T)                       | 6.93E-13         |
| 95     | PACD + OH = C <sub>2</sub> O <sub>3</sub>                                                                                         | k = 5.30E-12 exp(190/T)                       | 1.00E-11         |
| 96     | FORM + OH = HO <sub>2</sub> + CO                                                                                                  | k = 5.40E-12 exp(135/T)                       | 8.49E-12         |
| 97     | FORM = 2 HO <sub>2</sub> + CO                                                                                                     | Photolysis                                    | 1.78E-5          |
| 98     | FORM = CO + H <sub>2</sub>                                                                                                        | Photolysis                                    | 2.38E-5          |
| 99     | FORM + O = OH + HO <sub>2</sub> + CO                                                                                              | k = 3.40E-11 exp(-1600/T)                     | 1.58E-13         |
| 100    | FORM + NO <sub>3</sub> = HNO <sub>3</sub> + HO <sub>2</sub> + CO                                                                  | k = 5.50E-16                                  | 5.50E-16         |
| 101    | FORM + HO <sub>2</sub> = HCO <sub>3</sub>                                                                                         | k = 9.70E-15 exp(625/T)                       | 7.90E-14         |
| 102    | HCO <sub>3</sub> = FORM + HO <sub>2</sub>                                                                                         | k = 2.40E+12 exp(-7000/T)                     | 1.51E+2          |
| 103    | HCO <sub>3</sub> + NO = FACD + NO <sub>2</sub> + HO <sub>2</sub>                                                                  | k = 5.60E-12                                  | 5.60E-12         |
| 104    | HCO <sub>3</sub> + HO <sub>2</sub> = 0.5 MEPX + 0.5 FACD + 0.2 OH + 0.2 HO <sub>2</sub>                                           | k = 5.60E-15 exp(2300/T)                      | 1.26E-11         |
| 105    | ALD <sub>2</sub> + O = C <sub>2</sub> O <sub>3</sub> + OH                                                                         | k = 1.80E-11 exp(-1100/T)                     | 4.49E-13         |
| 106    | ALD <sub>2</sub> + OH = C <sub>2</sub> O <sub>3</sub>                                                                             | k = 4.70E-12 exp(345/T)                       | 1.50E-11         |
| 107    | ALD <sub>2</sub> + NO <sub>3</sub> = C <sub>2</sub> O <sub>3</sub> + HNO <sub>3</sub>                                             | k = 1.40E-12 exp(-1860/T)                     | 2.73E-15         |
| 108    | ALD <sub>2</sub> = MEO <sub>2</sub> + RO <sub>2</sub> + CO + HO <sub>2</sub>                                                      | Photolysis                                    | 1.76E-6          |
| 109    | ALDX + O = CXO <sub>3</sub> + OH                                                                                                  | k = 1.30E-11 exp(-870/T)                      | 7.02E-13         |
| 110    | ALDX + OH = CXO <sub>3</sub>                                                                                                      | k = 4.90E-12 exp(405/T)                       | 1.91E-11         |
| 111    | ALDX + NO <sub>3</sub> = CXO <sub>3</sub> + HNO <sub>3</sub>                                                                      | k = 6.30E-15                                  | 6.30E-15         |
| 112    | ALDX = ALD <sub>2</sub> + XO <sub>2</sub> H + RO <sub>2</sub> + CO + HO <sub>2</sub>                                              | Photolysis                                    | 6.96E-6          |
| 113    | GLYD + OH = 0.2 GLY + 0.2 HO <sub>2</sub> + 0.8 C <sub>2</sub> O <sub>3</sub>                                                     | k = 8.00E-12                                  | 8.00E-12         |
| 114    | GLYD = 0.74 FORM + 0.89 CO + 1.4 HO <sub>2</sub> + 0.15 MEOH + 0.19 OH + 0.11 GLY + 0.11 XO <sub>2</sub> H + 0.11 RO <sub>2</sub> | Photolysis                                    | 1.56E-6          |
| 115    | GLYD + NO <sub>3</sub> = HNO <sub>3</sub> + C <sub>2</sub> O <sub>3</sub>                                                         | k = 1.40E-12 exp(-1860/T)                     | 2.73E-15         |
| 116    | GLY + OH = 1.8 CO + 0.2 XO <sub>2</sub> + 0.2 RO <sub>2</sub> + HO <sub>2</sub>                                                   | k = 3.10E-12 exp(340/T)                       | 9.70E-12         |
| 117    | GLY = 2 HO <sub>2</sub> + 2 CO                                                                                                    | Photolysis                                    | 5.50E-5          |
| 118    | GLY + NO <sub>3</sub> = HNO <sub>3</sub> + 1.5 CO + 0.5 XO <sub>2</sub> + 0.5 RO <sub>2</sub> + HO <sub>2</sub>                   | k = 1.40E-12 exp(-1860/T)                     | 2.73E-15         |
| 119    | MGLY = C <sub>2</sub> O <sub>3</sub> + HO <sub>2</sub> + CO                                                                       | Photolysis                                    | 1.46E-4          |
| 120    | MGLY + NO <sub>3</sub> = HNO <sub>3</sub> + C <sub>2</sub> O <sub>3</sub> + XO <sub>2</sub> + RO <sub>2</sub>                     | k = 1.40E-12 exp(-1860/T)                     | 2.73E-15         |
| 121    | MGLY + OH = C <sub>2</sub> O <sub>3</sub> + CO                                                                                    | k = 1.90E-12 exp(575/T)                       | 1.31E-11         |
| 122    | H <sub>2</sub> + OH = HO <sub>2</sub>                                                                                             | k = 7.70E-12 exp(-2100/T)                     | 6.70E-15         |



| Number | Reactants and Products                                                                                                                                                                                                                                               | Rate Constant Expression                                                                                         | k <sub>298</sub> |
|--------|----------------------------------------------------------------------------------------------------------------------------------------------------------------------------------------------------------------------------------------------------------------------|------------------------------------------------------------------------------------------------------------------|------------------|
| 123    | CO + OH = HO2                                                                                                                                                                                                                                                        | k = k <sub>1</sub> + k <sub>2</sub> [M]<br>k <sub>1</sub> = 1.44E-13<br>k <sub>2</sub> = 3.43E-33                | 2.28E-13         |
| 124    | CH <sub>4</sub> + OH = MEO <sub>2</sub> + RO <sub>2</sub>                                                                                                                                                                                                            | k = 1.85E-12 exp(-1690/T)                                                                                        | 6.37E-15         |
| 125    | ETHA + OH = 0.991 ALD <sub>2</sub> + 0.991 XO <sub>2</sub> H + 0.009 XO <sub>2</sub> N + RO <sub>2</sub>                                                                                                                                                             | k = 6.90E-12 exp(-1000/T)                                                                                        | 2.41E-13         |
| 126    | MEOH + OH = FORM + HO <sub>2</sub>                                                                                                                                                                                                                                   | k = 2.85E-12 exp(-345/T)                                                                                         | 8.95E-13         |
| 127    | ETOH + OH = 0.95 ALD <sub>2</sub> + 0.9 HO <sub>2</sub> + 0.1 XO <sub>2</sub> H + 0.1 RO <sub>2</sub> + 0.078 FORM + 0.011 GLYD                                                                                                                                      | k = 3.00E-12 exp(20/T)                                                                                           | 3.21E-12         |
| 128    | KET = 0.5 ALD <sub>2</sub> + 0.5 C <sub>2</sub> O <sub>3</sub> + 0.5 XO <sub>2</sub> H + 0.5 CXO <sub>3</sub> + 0.5 MEO <sub>2</sub> + RO <sub>2</sub> - 2.5 PAR                                                                                                     | Photolysis                                                                                                       | 2.27E-7          |
| 129    | ACET = 0.38 CO + 1.38 MEO <sub>2</sub> + 1.38 RO <sub>2</sub> + 0.62 C <sub>2</sub> O <sub>3</sub>                                                                                                                                                                   | Photolysis                                                                                                       | 2.08E-7          |
| 130    | ACET + OH = FORM + C <sub>2</sub> O <sub>3</sub> + XO <sub>2</sub> + RO <sub>2</sub>                                                                                                                                                                                 | k = 1.41E-12 exp(-620.6/T)                                                                                       | 1.76E-13         |
| 131    | PRPA + OH = 0.71 ACET + 0.26 ALDX + 0.26 PAR + 0.97 XO <sub>2</sub> H + 0.03 XO <sub>2</sub> N + RO <sub>2</sub>                                                                                                                                                     | k = 7.60E-12 exp(-585/T)                                                                                         | 1.07E-12         |
| 132    | PAR + OH = 0.11 ALDX + 0.76 ROR + 0.13 XO <sub>2</sub> N + 0.11 XO <sub>2</sub> H + 0.76 XO <sub>2</sub> + RO <sub>2</sub> - 0.11 PAR                                                                                                                                | k = 8.10E-13                                                                                                     | 8.10E-13         |
| 133    | ROR = 0.2 KET + 0.42 ACET + 0.74 ALD <sub>2</sub> + 0.37 ALDX + 0.04 XO <sub>2</sub> N + 0.94 XO <sub>2</sub> H + 0.98 RO <sub>2</sub> + 0.02 ROR - 2.7 PAR                                                                                                          | k = 5.70E+12 exp(-5780/T)                                                                                        | 2.15E+4          |
| 134    | ROR + O <sub>2</sub> = KET + HO <sub>2</sub>                                                                                                                                                                                                                         | k = 1.50E-14 exp(-200/T)                                                                                         | 7.67E-15         |
| 135    | ROR + NO <sub>2</sub> = NTR <sub>1</sub>                                                                                                                                                                                                                             | k = 8.60E-12 exp(400/T)                                                                                          | 3.29E-11         |
| 136    | ETHY + OH = 0.7 GLY + 0.7 OH + 0.3 FACD + 0.3 CO + 0.3 HO <sub>2</sub>                                                                                                                                                                                               | Falloff: F=0.37; n=1.3<br>k(0) = 5.00E-30 (T/300) <sup>-1.5</sup><br>k(inf) = 1.00E-12                           | 7.52E-13         |
| 137    | ETH + O = FORM + HO <sub>2</sub> + CO + 0.7 XO <sub>2</sub> H + 0.7 RO <sub>2</sub> + 0.3 OH                                                                                                                                                                         | k = 1.04E-11 exp(-792/T)                                                                                         | 7.29E-13         |
| 138    | ETH + OH = XO <sub>2</sub> H + RO <sub>2</sub> + 1.56 FORM + 0.22 GLYD                                                                                                                                                                                               | Falloff: F=0.48; n=1.15<br>k(0) = 8.60E-29 (T/300) <sup>-3.1</sup><br>k(inf) = 9.00E-12 (T/300) <sup>-0.85</sup> | 7.84E-12         |
| 139    | ETH + O <sub>3</sub> = FORM + 0.51 CO + 0.16 HO <sub>2</sub> + 0.16 OH + 0.37 FACD                                                                                                                                                                                   | k = 9.10E-15 exp(-2580/T)                                                                                        | 1.58E-18         |
| 140    | ETH + NO <sub>3</sub> = 0.5 NO <sub>2</sub> + 0.5 NTR <sub>1</sub> + 0.5 XO <sub>2</sub> H + 0.5 XO <sub>2</sub> + RO <sub>2</sub> + 1.125 FORM                                                                                                                      | k = 3.30E-12 exp(-2880/T)                                                                                        | 2.10E-16         |
| 141    | OLE + O = 0.2 ALD <sub>2</sub> + 0.3 ALDX + 0.1 HO <sub>2</sub> + 0.2 XO <sub>2</sub> H + 0.2 CO + 0.2 FORM + 0.01 XO <sub>2</sub> N + 0.21 RO <sub>2</sub> + 0.2 PAR + 0.1 OH                                                                                       | k = 1.00E-11 exp(-280/T)                                                                                         | 3.91E-12         |
| 142    | OLE + OH = 0.781 FORM + 0.488 ALD <sub>2</sub> + 0.488 ALDX + 0.976 XO <sub>2</sub> H + 0.195 XO <sub>2</sub> + 0.024 XO <sub>2</sub> N + 1.195 RO <sub>2</sub> - 0.73 PAR                                                                                           | Falloff: F=0.5; n=1.13<br>k(0) = 8.00E-27 (T/300) <sup>-3.5</sup><br>k(inf) = 3.00E-11 (T/300) <sup>-1</sup>     | 2.86E-11         |
| 143    | OLE + O <sub>3</sub> = 0.295 ALD <sub>2</sub> + 0.555 FORM + 0.27 ALDX + 0.15 XO <sub>2</sub> H + 0.15 RO <sub>2</sub> + 0.334 OH + 0.08 HO <sub>2</sub> + 0.378 CO + 0.075 GLY + 0.075 MGLY + 0.09 FACD + 0.13 AACD + 0.04 H <sub>2</sub> O <sub>2</sub> - 0.79 PAR | k = 5.50E-15 exp(-1880/T)                                                                                        | 1.00E-17         |
| 144    | OLE + NO <sub>3</sub> = 0.5 NO <sub>2</sub> + 0.5 NTR <sub>1</sub> + 0.48 XO <sub>2</sub> + 0.48 XO <sub>2</sub> H + 0.04 XO <sub>2</sub> N + RO <sub>2</sub> + 0.5 FORM + 0.25 ALD <sub>2</sub> + 0.375 ALDX - 1 PAR                                                | k = 4.60E-13 exp(-1155/T)                                                                                        | 9.54E-15         |

| Number | Reactants and Products                                                                                                                                          | Rate Constant Expression                      | k <sub>298</sub> |
|--------|-----------------------------------------------------------------------------------------------------------------------------------------------------------------|-----------------------------------------------|------------------|
| 145    | IOLE + O = 1.24 ALD2 + 0.66 ALDX + 0.1 XO2H + 0.1 RO2 + 0.1 CO + 0.1 PAR                                                                                        | k = 2.30E-11                                  | 2.30E-11         |
| 146    | IOLE + OH = 1.3 ALD2 + 0.7 ALDX + XO2H + RO2                                                                                                                    | k = 1.05E-11 exp(519/T)                       | 5.99E-11         |
| 147    | IOLE + O3 = 0.732 ALD2 + 0.442 ALDX + 0.128 FORM + 0.245 CO + 0.5 OH + 0.3 XO2H + 0.3 RO2 + 0.24 GLY + 0.06 MGLY + 0.29 PAR + 0.08 AACD + 0.08 H2O2             | k = 4.70E-15 exp(-1013/T)                     | 1.57E-16         |
| 148    | IOLE + NO3 = 0.5 NO2 + 0.5 NTR1 + 0.48 XO2 + 0.48 XO2H + 0.04 XO2N + RO2 + 0.5 ALD2 + 0.625 ALDX + PAR                                                          | k = 3.70E-13                                  | 3.70E-13         |
| 149    | ISOP + OH = ISO2 + RO2                                                                                                                                          | k = 2.70E-11 exp(390/T)                       | 9.99E-11         |
| 150    | ISOP + O = 0.75 ISPD + 0.5 FORM + 0.25 XO2 + 0.25 RO2 + 0.25 HO2 + 0.25 CXO3 + 0.25 PAR                                                                         | k = 3.00E-11                                  | 3.00E-11         |
| 151    | ISO2 + NO = 0.1 INTR + 0.9 NO2 + 0.673 FORM + 0.9 ISPD + 0.818 HO2 + 0.082 XO2H + 0.082 RO2                                                                     | k = 2.39E-12 exp(365/T)                       | 8.13E-12         |
| 152    | ISO2 + HO2 = 0.88 ISPX + 0.12 OH + 0.12 HO2 + 0.12 FORM + 0.12 ISPD                                                                                             | k = 7.43E-13 exp(700/T)                       | 7.78E-12         |
| 153    | ISO2 + C2O3 = 0.598 FORM + 1 ISPD + 0.728 HO2 + 0.072 XO2H + 0.8 MEO2 + 0.2 AACD + 0.872 RO2                                                                    | k = k(ref)/K<br>k(ref) = k(58)<br>K = 1.00E+0 | 1.30E-11         |
| 154    | ISO2 + RO2 = 0.598 FORM + 1 ISPD + 0.728 HO2 + 0.072 XO2H + 0.072 RO2                                                                                           | k = k(ref)/K<br>k(ref) = k(70)<br>K = 1.00E+0 | 3.48E-13         |
| 155    | ISO2 = HO2 + HPLD                                                                                                                                               | k = 3.30E+9 exp(-8300/T)                      | 2.64E-3          |
| 156    | ISOP + O3 = 0.6 FORM + 0.65 ISPD + 0.15 ALDX + 0.2 CXO3 + 0.35 PAR + 0.266 OH + 0.2 XO2 + 0.2 RO2 + 0.066 HO2 + 0.066 CO                                        | k = 1.03E-14 exp(-1995/T)                     | 1.27E-17         |
| 157    | ISOP + NO3 = 0.35 NO2 + 0.65 NTR2 + 0.64 XO2H + 0.33 XO2 + 0.03 XO2N + RO2 + 0.35 FORM + 0.35 ISPD                                                              | k = 3.03E-12 exp(-448/T)                      | 6.74E-13         |
| 158    | ISPD + OH = 0.022 XO2N + 0.521 XO2 + 0.115 MGLY + 0.115 MEO2 + 0.269 GLYD + 0.269 C2O3 + 0.457 OPO3 + 0.117 PAR + 0.137 ACET + 0.137 CO + 0.137 HO2 + 0.658 RO2 | k = 5.58E-12 exp(511/T)                       | 3.10E-11         |
| 159    | ISPD + O3 = 0.04 ALD2 + 0.231 FORM + 0.531 MGLY + 0.17 GLY + 0.17 ACET + 0.543 CO + 0.461 OH + 0.15 FACD + 0.398 HO2 + 0.143 C2O3                               | k = 3.88E-15 exp(-1770/T)                     | 1.02E-17         |
| 160    | ISPD + NO3 = 0.717 HNO3 + 0.142 NTR2 + 0.142 NO2 + 0.142 XO2 + 0.142 XO2H + 0.113 GLYD + 0.113 MGLY + 0.717 PAR + 0.717 CXO3 + 0.284 RO2                        | k = 4.10E-12 exp(-1860/T)                     | 7.98E-15         |
| 161    | ISPD = 0.76 HO2 + 0.34 XO2H + 0.16 XO2 + 0.34 MEO2 + 0.208 C2O3 + 0.26 FORM + 0.24 OLE + 0.24 PAR + 0.17 ACET + 0.128 GLYD + 0.84 RO2                           | Photolysis                                    | 1.60E-5          |

| Number | Reactants and Products                                                                                                                                             | Rate Constant Expression                      | k <sub>298</sub> |
|--------|--------------------------------------------------------------------------------------------------------------------------------------------------------------------|-----------------------------------------------|------------------|
| 162    | ISPX + OH = 0.904 EPOX + 0.933 OH + 0.067 ISO2 + 0.067 RO2 + 0.029 IOLE + 0.029 ALDX                                                                               | k = 2.23E-11 exp(372/T)                       | 7.77E-11         |
| 163    | HPLD = OH + ISPD                                                                                                                                                   | Photolysis                                    | 4.41E-4          |
| 164    | HPLD + NO3 = HNO3 + ISPD                                                                                                                                           | k = 6.00E-12 exp(-1860/T)                     | 1.17E-14         |
| 165    | EPOX + OH = EPX2 + RO2                                                                                                                                             | k = 5.78E-11 exp(-400/T)                      | 1.51E-11         |
| 166    | EPX2 + HO2 = 0.275 GLYD + 0.275 GLY + 0.275 MGLY + 1.125 OH + 0.825 HO2 + 0.375 FORM + 0.074 FACD + 0.251 CO + 2.175 PAR                                           | k = 7.43E-13 exp(700/T)                       | 7.78E-12         |
| 167    | EPX2 + NO = 0.275 GLYD + 0.275 GLY + 0.275 MGLY + 0.125 OH + 0.825 HO2 + 0.375 FORM + NO2 + 0.251 CO + 2.175 PAR                                                   | k = 2.39E-12 exp(365/T)                       | 8.13E-12         |
| 168    | EPX2 + C2O3 = 0.22 GLYD + 0.22 GLY + 0.22 MGLY + 0.1 OH + 0.66 HO2 + 0.3 FORM + 0.2 CO + 1.74 PAR + 0.8 MEO2 + 0.2 AACD + 0.8 RO2                                  | k = k(ref)/K<br>k(ref) = k(58)<br>K = 1.00E+0 | 1.30E-11         |
| 169    | EPX2 + RO2 = 0.275 GLYD + 0.275 GLY + 0.275 MGLY + 0.125 OH + 0.825 HO2 + 0.375 FORM + 0.251 CO + 2.175 PAR + RO2                                                  | k = k(ref)/K<br>k(ref) = k(70)<br>K = 1.00E+0 | 3.48E-13         |
| 170    | INTR + OH = 0.63 XO2 + 0.37 XO2H + RO2 + 0.444 NO2 + 0.185 NO3 + 0.104 INTR + 0.592 FORM + 0.331 GLYD + 0.185 FACD + 2.7 PAR + 0.098 OLE + 0.078 ALDX + 0.266 NTR2 | k = 3.10E-11                                  | 3.10E-11         |
| 171    | TERP + O = 0.15 ALDX + 5.12 PAR                                                                                                                                    | k = 3.60E-11                                  | 3.60E-11         |
| 172    | TERP + OH = 0.75 XO2H + 0.5 XO2 + 0.25 XO2N + 1.5 RO2 + 0.28 FORM + 1.66 PAR + 0.47 ALDX                                                                           | k = 1.50E-11 exp(449/T)                       | 6.77E-11         |
| 173    | TERP + O3 = 0.57 OH + 0.07 XO2H + 0.69 XO2 + 0.18 XO2N + 0.94 RO2 + 0.24 FORM + 0.001 CO + 7 PAR + 0.21 ALDX + 0.39 CXO3                                           | k = 1.20E-15 exp(-821/T)                      | 7.63E-17         |
| 174    | TERP + NO3 = 0.47 NO2 + 0.28 XO2H + 0.75 XO2 + 0.25 XO2N + 1.28 RO2 + 0.47 ALDX + 0.53 NTR2                                                                        | k = 3.70E-12 exp(175/T)                       | 6.66E-12         |
| 175    | BENZ + OH = 0.53 CRES + 0.352 BZO2 + 0.352 RO2 + 0.118 OPEN + 0.118 OH + 0.53 HO2                                                                                  | k = 2.30E-12 exp(-190/T)                      | 1.22E-12         |
| 176    | BZO2 + NO = 0.918 NO2 + 0.082 NTR2 + 0.918 GLY + 0.918 OPEN + 0.918 HO2                                                                                            | k = 2.70E-12 exp(360/T)                       | 9.04E-12         |
| 177    | BZO2 + C2O3 = GLY + OPEN + HO2 + MEO2 + RO2                                                                                                                        | k = k(ref)/K<br>k(ref) = k(58)<br>K = 1.00E+0 | 1.30E-11         |
| 178    | BZO2 + HO2 =                                                                                                                                                       | k = 1.90E-13 exp(1300/T)                      | 1.49E-11         |
| 179    | BZO2 + RO2 = GLY + OPEN + HO2 + RO2                                                                                                                                | k = k(ref)/K<br>k(ref) = k(70)<br>K = 1.00E+0 | 3.48E-13         |
| 180    | TOL + OH = 0.18 CRES + 0.65 TO2 + 0.72 RO2 + 0.1 OPEN + 0.1 OH + 0.07 XO2H + 0.18 HO2                                                                              | k = 1.80E-12 exp(340/T)                       | 5.63E-12         |

| Number | Reactants and Products                                                                                     | Rate Constant Expression                      | k <sub>298</sub> |
|--------|------------------------------------------------------------------------------------------------------------|-----------------------------------------------|------------------|
| 181    | TO2 + NO = 0.86 NO2 + 0.14 NTR2 + 0.417 GLY + 0.443 MGLY + 0.66 OPEN + 0.2 XOPN + 0.86 HO2                 | k = 2.70E-12 exp(360/T)                       | 9.04E-12         |
| 182    | TO2 + C2O3 = 0.48 GLY + 0.52 MGLY + 0.77 OPEN + 0.23 XOPN + HO2 + MEO2 + RO2                               | k = k(ref)/K<br>k(ref) = k(58)<br>K = 1.00E+0 | 1.30E-11         |
| 183    | TO2 + HO2 =                                                                                                | k = 1.90E-13 exp(1300/T)                      | 1.49E-11         |
| 184    | TO2 + RO2 = 0.48 GLY + 0.52 MGLY + 0.77 OPEN + 0.23 XOPN + HO2 + RO2                                       | k = k(ref)/K<br>k(ref) = k(70)<br>K = 1.00E+0 | 3.48E-13         |
| 185    | XYL + OH = 0.155 CRES + 0.544 XLO2 + 0.602 RO2 + 0.244 XOPN + 0.244 OH + 0.058 XO2H + 0.155 HO2            | k = 1.85E-11                                  | 1.85E-11         |
| 186    | XLO2 + NO = 0.86 NO2 + 0.14 NTR2 + 0.221 GLY + 0.675 MGLY + 0.3 OPEN + 0.56 XOPN + 0.86 HO2                | k = 2.70E-12 exp(360/T)                       | 9.04E-12         |
| 187    | XLO2 + HO2 =                                                                                               | k = 1.90E-13 exp(1300/T)                      | 1.49E-11         |
| 188    | XLO2 + C2O3 = 0.26 GLY + 0.77 MGLY + 0.35 OPEN + 0.65 XOPN + HO2 + MEO2 + RO2                              | k = k(ref)/K<br>k(ref) = k(58)<br>K = 1.00E+0 | 1.30E-11         |
| 189    | XLO2 + RO2 = 0.26 GLY + 0.77 MGLY + 0.35 OPEN + 0.65 XOPN + HO2 + RO2                                      | k = k(ref)/K<br>k(ref) = k(70)<br>K = 1.00E+0 | 3.48E-13         |
| 190    | CRES + OH = 0.025 GLY + 0.025 OPEN + HO2 + 0.2 CRO + 0.732 CAT1 + 0.02 XO2N + 0.02 RO2                     | k = 1.70E-12 exp(950/T)                       | 4.12E-11         |
| 191    | CRES + NO3 = 0.3 CRO + HNO3 + 0.48 XO2 + 0.12 XO2H + 0.24 GLY + 0.24 MGLY + 0.48 OPO3 + 0.1 XO2N + 0.7 RO2 | k = 1.40E-11                                  | 1.40E-11         |
| 192    | CRO + NO2 = CRON                                                                                           | k = 2.10E-12                                  | 2.10E-12         |
| 193    | CRO + HO2 = CRES                                                                                           | k = 5.50E-12                                  | 5.50E-12         |
| 194    | CRON + OH = NTR2 + 0.5 CRO                                                                                 | k = 1.53E-12                                  | 1.53E-12         |
| 195    | CRON + NO3 = NTR2 + 0.5 CRO + HNO3                                                                         | k = 3.80E-12                                  | 3.80E-12         |
| 196    | CRON = HONO + HO2 + FORM + OPEN                                                                            | Photolysis                                    | 9.45E-5          |
| 197    | XOPN = 0.4 GLY + XO2H + 0.7 HO2 + 0.7 CO + 0.3 C2O3                                                        | Photolysis                                    | 5.04E-4          |
| 198    | XOPN + OH = MGLY + 0.4 GLY + 2 XO2H + 2 RO2                                                                | k = 9.00E-11                                  | 9.00E-11         |
| 199    | XOPN + O3 = 1.2 MGLY + 0.5 OH + 0.6 C2O3 + 0.1 ALD2 + 0.5 CO + 0.3 XO2H + 0.3 RO2                          | k = 1.08E-16 exp(-500/T)                      | 2.02E-17         |
| 200    | XOPN + NO3 = 0.5 NO2 + 0.5 NTR2 + 0.45 XO2H + 0.45 XO2 + 0.1 XO2N + RO2 + 0.25 OPEN + 0.25 MGLY            | k = 3.00E-12                                  | 3.00E-12         |
| 201    | OPEN = OPO3 + HO2 + CO                                                                                     | Photolysis                                    | 5.04E-4          |
| 202    | OPEN + OH = 0.6 OPO3 + 0.4 XO2H + 0.4 RO2 + 0.4 GLY                                                        | k = 4.40E-11                                  | 4.40E-11         |
| 203    | OPEN + O3 = 1.4 GLY + 0.24 MGLY + 0.5 OH + 0.12 C2O3 + 0.08 FORM + 0.02 ALD2 + 1.98 CO + 0.56 HO2          | k = 5.40E-17 exp(-500/T)                      | 1.01E-17         |
| 204    | OPEN + NO3 = OPO3 + HNO3                                                                                   | k = 3.80E-12                                  | 3.80E-12         |
| 205    | CAT1 + OH = 0.14 FORM + 0.2 HO2 + 0.5 CRO                                                                  | k = 5.00E-11                                  | 5.00E-11         |

| Number | Reactants and Products                                                                    | Rate Constant Expression                      | k <sub>298</sub> |
|--------|-------------------------------------------------------------------------------------------|-----------------------------------------------|------------------|
| 206    | CAT1 + NO3 = CRO + HNO3                                                                   | k = 1.70E-10                                  | 1.70E-10         |
| 207    | OPO3 + NO = NO2 + 0.5 GLY + 0.5 CO + 0.8 HO2 + 0.2 CXO3                                   | k = 1.00E-11                                  | 1.00E-11         |
| 208    | OPO3 + NO2 = OPAN                                                                         | k = k(ref)/K<br>k(ref) = k(54)<br>K = 1.00E+0 | 9.40E-12         |
| 209    | OPAN = OPO3 + NO2                                                                         | k = k(ref)/K<br>k(ref) = k(55)<br>K = 1.00E+0 | 2.98E-4          |
| 210    | OPO3 + HO2 = 0.41 PACD + 0.15 AACD + 0.15 O3 + 0.44 ALDX + 0.44 XO2H + 0.44 RO2 + 0.44 OH | k = k(ref)/K<br>k(ref) = k(57)<br>K = 1.00E+0 | 1.39E-11         |
| 211    | OPO3 + C2O3 = MEO2 + XO2 + ALDX + 2 RO2                                                   | k = k(ref)/K<br>k(ref) = k(59)<br>K = 1.00E+0 | 1.55E-11         |
| 212    | OPO3 + RO2 = 0.8 XO2H + 0.8 ALDX + 1.8 RO2 + 0.2 AACD                                     | k = k(ref)/K<br>k(ref) = k(58)<br>K = 1.00E+0 | 1.30E-11         |
| 213    | OPAN + OH = 0.5 NO2 + 0.5 GLY + CO + 0.5 NTR2                                             | k = 3.60E-11                                  | 3.60E-11         |
| 214    | PANX + OH = ALD2 + NO2                                                                    | k = 3.00E-12                                  | 3.00E-12         |
| 215    | NTR2 = HNO3                                                                               | k = 2.30E-5                                   | 2.30E-5          |
| 216    | ECH4 + OH = MEO2 + RO2                                                                    | k = 1.85E-12 exp(-1690/T)                     | 6.37E-15         |

**Table S2. CAMx species names and descriptions for CB6 mechanisms.**

| Model Species | Description                                                     | Carbon # <sup>1</sup> | Mol. Wt. <sup>2</sup> |
|---------------|-----------------------------------------------------------------|-----------------------|-----------------------|
| APO2          | Peroxy radical from OH addition to $\alpha$ -pinene             | 10                    | 185.2                 |
| BZO2          | Peroxy radical from OH addition to benzene                      | 6                     | 159.1                 |
| C2O3          | Acetylperoxy radical                                            | 2                     | 75.0                  |
| CRO           | Alkoxy radical from cresol                                      | 7                     | 107.1                 |
| CXO3          | C3 and higher acylperoxy radicals                               | 3                     | 89.0                  |
| EPX2          | Peroxy radical from EPOX reaction with OH                       | 5                     | 149.1                 |
| HCO3          | Adduct from HO2 plus formaldehyde                               | 1                     | 63.0                  |
| HO2           | Hydroperoxy radical                                             | 1                     | 28.0                  |
| ISO2          | Peroxy radical from OH addition to isoprene                     | 5                     | 117.1                 |
| MEO2          | Methylperoxy radical                                            | 1                     | 47.0                  |
| NO3           | Nitrate radical                                                 |                       | 62.0                  |
| O             | Oxygen atom in the O <sup>3</sup> (P) electronic state          |                       | 16.0                  |
| O1D           | Oxygen atom in the O <sup>1</sup> (D) electronic state          |                       | 16.0                  |
| OH            | Hydroxyl radical                                                |                       | 17.0                  |
| OPO3          | Peroxyacyl radical from OPEN                                    | 4                     | 115.0                 |
| RO2           | Operator to approximate total peroxy radical concentration      |                       | 87.1                  |
| ROR           | Secondary alkoxy radical                                        | 1                     | 71.1                  |
| SQO2          | Peroxy radical from OH addition to SQT                          | 15                    | 253.3                 |
| TO2           | Peroxy radical from OH addition to TOL                          | 7                     | 173.1                 |
| TPO2          | Peroxy radical from OH addition to TERP                         | 10                    | 185.2                 |
| XLO2          | Peroxy radical from OH addition to XYL                          | 8                     | 187.1                 |
| XO2           | NO to NO2 conversion from alkylperoxy (RO2) radical             |                       | 87.1                  |
| XO2H          | NO to NO2 conversion (XO2) accompanied by HO2 production        |                       | 87.1                  |
| XO2N          | NO to organic nitrate conversion from alkylperoxy (RO2) radical |                       | 87.1                  |
| I             | Iodine atom                                                     |                       | 126.90                |
| IO            | Iodine monoxide                                                 |                       | 142.89                |
| OIO           | Iodine dioxide                                                  |                       | 158.88                |
| AACD          | Acetic acid                                                     | 2                     | 60.0                  |
| ACET          | Acetone                                                         | 3                     | 58.1                  |
| ALD2          | Acetaldehyde                                                    | 2                     | 44.0                  |
| ALDX          | Propionaldehyde and higher aldehydes                            | 2                     | 58.1                  |
| APIN          | $\alpha$ -Pinene                                                | 10                    | 136.2                 |
| BENZ          | Benzene                                                         | 6                     | 78.1                  |
| CAT1          | Methyl-catechols                                                | 7                     | 124.1                 |
| CO            | Carbon monoxide                                                 | 1                     | 28.0                  |
| CH4           | Methane                                                         | 1                     | 16.0                  |
| CRES          | Cresols                                                         | 7                     | 108.1                 |
| CRON          | Nitro-cresols                                                   | 7                     | 153.1                 |
| EPOX          | Epoxide formed from ISPX reaction with OH                       | 5                     | 118.1                 |
| ETH           | Ethene                                                          | 2                     | 28.0                  |

| Model Species | Description                                                       | Carbon # <sup>1</sup> | Mol. Wt. <sup>2</sup> |
|---------------|-------------------------------------------------------------------|-----------------------|-----------------------|
| ETHA          | Ethane                                                            | 2                     | 30.1                  |
| ETHY          | Ethyne                                                            | 2                     | 26.0                  |
| ETOH          | Ethanol                                                           | 2                     | 46.1                  |
| FACD          | Formic acid                                                       | 1                     | 46.0                  |
| FORM          | Formaldehyde                                                      | 1                     | 30.0                  |
| GLY           | Glyoxal                                                           | 2                     | 58.0                  |
| GLYD          | Glycolaldehyde                                                    | 2                     | 60.0                  |
| H2O2          | Hydrogen peroxide                                                 |                       | 34.0                  |
| HACT          | Hydroxyacetone                                                    | 3                     | 74.1                  |
| HNO3          | Nitric acid                                                       |                       | 63.0                  |
| HONO          | Nitrous acid                                                      |                       | 47.0                  |
| HPLD          | Hydroperoxyaldehyde                                               | 5                     | 116.1                 |
| INTR          | Organic nitrates from ISO2 reaction with NO                       | 5                     | 147.1                 |
| IOLE          | Internal olefin carbon bond (R-C=C-R)                             | 4                     | 56.1                  |
| ISOP          | Isoprene                                                          | 5                     | 68.1                  |
| ISPD          | Isoprene product (lumped methacrolein, methyl vinyl ketone, etc.) | 4                     | 70.1                  |
| ISPX          | Hydroperoxides from ISO2 reaction with HO2                        | 5                     | 118.1                 |
| KET           | Ketone carbon bond (C=O)                                          | 1                     | 72.1                  |
| MEOH          | Methanol                                                          | 1                     | 32.0                  |
| MEPX          | Methylhydroperoxide                                               | 1                     | 48.0                  |
| MGLY          | Methylglyoxal                                                     | 3                     | 72.0                  |
| N2O5          | Dinitrogen pentoxide                                              |                       | 108.0                 |
| NO            | Nitric oxide                                                      |                       | 30.0                  |
| NO2           | Nitrogen dioxide                                                  |                       | 46.0                  |
| NTR           | Organic nitrates                                                  | 4                     | 119.1                 |
| O3            | Ozone                                                             |                       | 48.0                  |
| OLE           | Terminal olefin carbon bond (R-C=C)                               | 3                     | 42.1                  |
| OPAN          | Peroxyacyl nitrate (PAN compound) from OPO3                       | 4                     | 161.0                 |
| OPEN          | Aromatic ring opening product (unsaturated dicarbonyl)            | 4                     | 84.0                  |
| PACD          | Peroxyacetic and higher peroxy-carboxylic acids                   | 2                     | 76.0                  |
| PAN           | Peroxyacetyl Nitrate                                              | 2                     | 121.0                 |
| PANX          | C3 and higher peroxyacyl nitrate                                  | 3                     | 135.0                 |
| PAR           | Paraffin carbon bond (C-C)                                        | 1                     | 72.1                  |
| PNA           | Peroxynitric acid                                                 |                       | 79.0                  |
| PRPA          | Propane                                                           | 3                     | 44.1                  |
| ROOH          | Higher organic peroxide                                           |                       | 90.1                  |
| SQT           | Sesquiterpenes                                                    | 15                    | 204.3                 |
| SO2           | Sulfur dioxide                                                    |                       | 64.0                  |
| SULF          | Sulfuric acid (gaseous)                                           |                       | 98.0                  |
| TERP          | Monoterpenes                                                      | 10                    | 136.2                 |
| TOL           | Toluene and other monoalkyl aromatics                             | 7                     | 92.1                  |
| XOPN          | Aromatic ring opening product (unsaturated dicarbonyl)            | 5                     | 98.1                  |

| Model Species | Description                                            | Carbon # <sup>1</sup> | Mol. Wt. <sup>2</sup> |
|---------------|--------------------------------------------------------|-----------------------|-----------------------|
| XYL           | Xylene and other polyalkyl aromatics                   | 8                     | 106.2                 |
| NTR1          | Simple organic nitrates                                |                       | 119.1                 |
| NTR2          | Multi-functional organic nitrates                      |                       | 135.1                 |
| ECH4          | Emitted methane (to enable tracking separate from CH4) | 1                     | 16.0                  |
| XPRP          | Operator for organic nitrates from PRPA                | 3                     | 89.1                  |
| XPAR          | Operator for organic nitrates from PAR                 | 1                     | 117.1                 |
| CRNO          | Nitro-cresol oxy radical                               | 7                     | 152.1                 |
| CRN2          | Nitro-cresol peroxy radical                            | 7                     | 168.1                 |
| CRPX          | Nitro-cresol hydroperoxide                             | 7                     | 169.1                 |
| CAO2          | Ring-opening product from methyl catechol              | 7                     | 173.1                 |
| I2            | Molecular iodine                                       |                       | 253.80                |
| I2O2          | Diiodine dioxide                                       |                       | 285.78                |
| IXOY          | Condensable iodine oxides                              |                       | 301.77                |
| HOI           | Hypoiodous acid                                        |                       | 143.90                |
| HIO3          | Iodic acid                                             |                       | 175.88                |
| INO3          | Iodine nitrate                                         |                       | 188.87                |
| DMS           | Dimethyl sulfate                                       | 2                     | 62.10                 |

<sup>1</sup> Carbon # is the precise number of carbon atoms for each model species.

<sup>2</sup> Mol. Wt. is a representative molecular weight, intended only for estimating molecular diffusivity, e.g. in dry deposition calculations. Diffusivity requires a different interpretation (complete molecules) than Carbon Bond chemistry (chemical groups).



**Table S3. Listing of the CB6r2h halogen mechanism (see Table S1 for a complete listing of CB6r2). See Tables S2 and S4 for species names.  $k_{298}$  is the rate constant at 298 K and 1 atmosphere using units in  $\text{cm}^3 \text{molecule}^{-1} \text{s}^{-1}$ . For photolysis reactions  $k_{298}$  shows the photolysis rate at a solar zenith angle of  $60^\circ$  and height of 600 m MSL/AGL.**

| Number | Reactants and Products                                                                                                               | Rate Constant Expression                                                                                                                       | $k_{298}$ |
|--------|--------------------------------------------------------------------------------------------------------------------------------------|------------------------------------------------------------------------------------------------------------------------------------------------|-----------|
| 1      | $\text{CL}_2 = 2 \text{ CL}$                                                                                                         | Photolysis                                                                                                                                     | 1.56E-3   |
| 2      | $\text{HOCL} = \text{CL} + \text{OH}$                                                                                                | Photolysis                                                                                                                                     | 1.34E-4   |
| 3      | $\text{CL} + \text{O}_3 = \text{CLO}$                                                                                                | $k = 2.30\text{E-}11 \exp(-200/T)$                                                                                                             | 1.18E-11  |
| 4      | $\text{CLO} + \text{CLO} = 0.3 \text{ CL}_2 + 1.4 \text{ CL}$                                                                        | $k = 1.63\text{E-}14$                                                                                                                          | 1.63E-14  |
| 5      | $\text{CLO} + \text{NO} = \text{CL} + \text{NO}_2$                                                                                   | $k = 6.40\text{E-}12 \exp(290/T)$                                                                                                              | 1.69E-11  |
| 6      | $\text{CLO} + \text{HO}_2 = \text{HOCL}$                                                                                             | $k = 2.70\text{E-}12 \exp(220/T)$                                                                                                              | 5.65E-12  |
| 7      | $\text{CLO} + \text{NO}_2 = \text{CLN}_3$                                                                                            | Falloff: $F=0.6; n=1$<br>$k(0) = 1.80\text{E-}31 (T/300)^{-3.4}$<br>$k(\text{inf}) = 1.50\text{E-}11 (T/300)^{-1.9}$                           | 2.34E-12  |
| 8      | $\text{CLN}_3 = \text{CLO} + \text{NO}_2$                                                                                            | Falloff: $F=0.6; n=1$<br>$k(0) = 4.48\text{E-}5 (T/300)^{-1} \exp(-12530/T)$<br>$k(\text{inf}) = 3.71\text{E+}15 (T/300)^{3.5} \exp(-12530/T)$ | 3.11E-4   |
| 9      | $\text{CLN}_3 = \text{CLO} + \text{NO}_2$                                                                                            | Photolysis                                                                                                                                     | 4.97E-6   |
| 10     | $\text{CLN}_3 = \text{CL} + \text{NO}_3$                                                                                             | Photolysis                                                                                                                                     | 4.67E-4   |
| 11     | $\text{CLN}_3 + \text{H}_2\text{O} = \text{HOCL} + \text{HNO}_3$                                                                     | $k = 2.50\text{E-}22$                                                                                                                          | 2.50E-22  |
| 12     | $\text{OH} + \text{HCL} = \text{CL}$                                                                                                 | $k = 6.58\text{E-}13 (T/300)^{1.2} \exp(58/T)$                                                                                                 | 7.93E-13  |
| 13     | $\text{OH} + \text{FMCL} = \text{CL} + \text{CO}$                                                                                    | $k = 3.67\text{E-}11 \exp(-1419/T)$                                                                                                            | 3.14E-13  |
| 14     | $\text{FMCL} = \text{CL} + \text{CO} + \text{HO}_2$                                                                                  | Photolysis                                                                                                                                     | 6.10E-8   |
| 15     | $\text{CLO} + \text{MEO}_2 = \text{CL} + \text{FORM} + \text{HO}_2$                                                                  | $k = 4.10\text{E-}13 \exp(-800/T)$                                                                                                             | 2.80E-14  |
| 16     | $\text{CL} + \text{CH}_4 = \text{HCL} + \text{MEO}_2$                                                                                | $k = 6.60\text{E-}12 \exp(-1240/T)$                                                                                                            | 1.03E-13  |
| 17     | $\text{CL} + \text{PAR} = \text{HCL}$                                                                                                | $k = 5.00\text{E-}11$                                                                                                                          | 5.00E-11  |
| 18     | $\text{CL} + \text{ETHA} = \text{HCL} + 0.991 \text{ ALD}_2 + 0.991 \text{ XO}_2\text{H} + 0.009 \text{ XO}_2\text{N} + \text{RO}_2$ | $k = 8.30\text{E-}11 \exp(-100/T)$                                                                                                             | 5.93E-11  |
| 19     | $\text{CL} + \text{PRPA} = \text{HCL} + \text{ACET} + 0.97 \text{ XO}_2\text{H} + 0.03 \text{ XO}_2\text{N} + \text{RO}_2$           | $k = 1.40\text{E-}10$                                                                                                                          | 1.40E-10  |
| 20     | $\text{CL} + \text{ISOP} = \text{FMCL} + \text{ISPD} + 0.96 \text{ XO}_2\text{H} + 0.04 \text{ XO}_2\text{N} + \text{RO}_2$          | $k = 4.30\text{E-}10$                                                                                                                          | 4.30E-10  |
| 21     | $\text{HCL} + \text{N}_2\text{O}_5 = \text{CLN}_2 + \text{HNO}_3$                                                                    | $k = 6.00\text{E-}13$                                                                                                                          | 6.00E-13  |
| 22     | $\text{CLN}_2 = \text{CL} + \text{NO}_2$                                                                                             | Photolysis                                                                                                                                     | 2.86E-4   |
| 23     | $\text{BR}_2 = 2 \text{ BR}$                                                                                                         | Photolysis                                                                                                                                     | 2.79E-2   |
| 24     | $\text{HOBR} = \text{BR} + \text{OH}$                                                                                                | Photolysis                                                                                                                                     | 1.51E-3   |
| 25     | $\text{BR}_2 + \text{OH} = \text{HOBR} + \text{BR}$                                                                                  | $k = 5.40\text{E-}11 \exp(180/T)$                                                                                                              | 9.88E-11  |
| 26     | $\text{HBR} + \text{OH} = \text{BR}$                                                                                                 | $k = 5.50\text{E-}12 \exp(-200/T)$                                                                                                             | 2.81E-12  |
| 27     | $\text{BR} + \text{O}_3 = \text{BRO}$                                                                                                | $k = 1.60\text{E-}11 \exp(780/T)$                                                                                                              | 2.19E-10  |
| 28     | $\text{BR} + \text{HO}_2 = \text{HBR}$                                                                                               | $k = 4.80\text{E-}12 \exp(310/T)$                                                                                                              | 1.36E-11  |
| 29     | $\text{BR} + \text{NO}_2 = \text{BRN}_2$                                                                                             | Falloff: $F=0.6; n=1$<br>$k(0) = 4.20\text{E-}31 (T/300)^{-2.4}$<br>$k(\text{inf}) = 2.70\text{E-}11$                                          | 4.89E-12  |
| 30     | $\text{BR} + \text{NO}_3 = \text{BRO} + \text{NO}_2$                                                                                 | $k = 1.60\text{E-}11$                                                                                                                          | 1.60E-11  |
| 31     | $\text{BRO} = \text{BR} + \text{O}$                                                                                                  | Photolysis                                                                                                                                     | 2.05E-2   |
| 32     | $\text{BRO} + \text{HO}_2 = \text{HOBR}$                                                                                             | $k = 4.50\text{E-}12 \exp(460/T)$                                                                                                              | 2.11E-11  |
| 33     | $\text{BRO} + \text{OH} = \text{BR} + \text{HO}_2$                                                                                   | $k = 1.70\text{E-}11 \exp(250/T)$                                                                                                              | 3.93E-11  |
| 34     | $\text{BRO} + \text{BRO} = 2 \text{ BR}$                                                                                             | $k = 2.40\text{E-}12 \exp(40/T)$                                                                                                               | 2.74E-12  |
| 35     | $\text{BRO} + \text{BRO} = \text{BR}_2$                                                                                              | $k = 2.80\text{E-}14 \exp(860/T)$                                                                                                              | 5.02E-13  |
| 36     | $\text{BRO} + \text{NO} = \text{BR} + \text{NO}_2$                                                                                   | $k = 8.80\text{E-}12 \exp(260/T)$                                                                                                              | 2.11E-11  |
| 37     | $\text{BRO} + \text{NO}_2 = \text{BRN}_3$                                                                                            | Falloff: $F=0.6; n=1$<br>$k(0) = 5.20\text{E-}31 (T/300)^{-3.2}$<br>$k(\text{inf}) = 6.90\text{E-}12$                                          | 2.81E-12  |
| 38     | $\text{BRN}_2 = \text{BR} + \text{NO}_2$                                                                                             | Photolysis                                                                                                                                     | 3.21E-3   |

| Number | Reactants and Products                                | Rate Constant Expression                                                                       | k <sub>298</sub> |
|--------|-------------------------------------------------------|------------------------------------------------------------------------------------------------|------------------|
| 39     | BRN3 = BR + NO3                                       | Photolysis                                                                                     | 9.76E-4          |
| 40     | BRN3 + H2O = HOBR + HNO3                              | k = 2.50E-22                                                                                   | 2.50E-22         |
| 41     | FMBR + OH = BR + CO                                   | k = 5.00E-12                                                                                   | 5.00E-12         |
| 42     | FMBR = BR + CO + HO2                                  | Photolysis                                                                                     | 4.15E-6          |
| 43     | BRO + MEO2 = 0.75 HOBR + 0.25 BR + FORM               | k = 4.10E-13 exp(-800/T)                                                                       | 2.80E-14         |
| 44     | BR + FORM = HBR + CO + HO2                            | k = 7.70E-11 exp(-580/T)                                                                       | 1.10E-11         |
| 45     | BR + ALD2 = HBR + C2O3                                | k = 1.80E-11 exp(-460/T)                                                                       | 3.84E-12         |
| 46     | BR + OLE = FMBR + ALD2 + XO2H - 1 PAR + RO2           | k = 3.60E-12                                                                                   | 3.60E-12         |
| 47     | BR + ISOP = FMBR + ISPD + 0.96 XO2H + 0.04 XO2N + RO2 | k = 5.00E-12                                                                                   | 5.00E-12         |
| 48     | I2 = 2 I                                              | Photolysis                                                                                     | 1.30E-1          |
| 49     | HOI = I + OH                                          | Photolysis                                                                                     | 6.36E-2          |
| 50     | I2 + OH = I + HOI                                     | k = 2.10E-10                                                                                   | 2.10E-10         |
| 51     | I2 + NO3 = I + INO3                                   | k = 1.50E-12                                                                                   | 1.50E-12         |
| 52     | HI + OH = I                                           | k = 1.60E-11 exp(440/T)                                                                        | 7.00E-11         |
| 53     | I + O3 = IO                                           | k = 2.10E-11 exp(-830/T)                                                                       | 1.30E-12         |
| 54     | I + HO2 = HI                                          | k = 1.50E-11 exp(-1090/T)                                                                      | 3.87E-13         |
| 55     | I + NO2 = INO2                                        | Falloff: F=0.63; n=1<br>k(0) = 3.00E-31 (T/300) <sup>-1</sup><br>k(inf) = 6.60E-11             | 5.24E-12         |
| 56     | IO = I + O                                            | Photolysis                                                                                     | 1.18E-1          |
| 57     | IO + IO = 0.4 I + 0.4 OIO + 0.6 I2O2                  | k = 5.40E-11 exp(180/T)                                                                        | 9.88E-11         |
| 58     | IO + HO2 = HOI                                        | k = 1.40E-11 exp(540/T)                                                                        | 8.57E-11         |
| 59     | IO + NO = I + NO2                                     | k = 7.15E-12 exp(300/T)                                                                        | 1.96E-11         |
| 60     | IO + NO2 = INO3                                       | Falloff: F=0.4; n=1<br>k(0) = 7.70E-31 (T/300) <sup>-5</sup><br>k(inf) = 1.60E-11              | 3.55E-12         |
| 61     | HOI + OH = IO                                         | k = 5.00E-12                                                                                   | 5.00E-12         |
| 62     | OIO = I                                               | Photolysis                                                                                     | 1.28E-1          |
| 63     | OIO + OH = HIO3                                       | Falloff: F=0.3; n=1<br>k(0) = 1.50E-27 (T/300) <sup>-3.93</sup><br>k(inf) = 5.50E-10 exp(46/T) | 4.72E-10         |
| 64     | OIO + IO = IXOY                                       | k = 1.00E-10                                                                                   | 1.00E-10         |
| 65     | OIO + OIO = IXOY                                      | k = 1.50E-10                                                                                   | 1.50E-10         |
| 66     | OIO + NO = IO + NO2                                   | k = 1.10E-12 exp(542/T)                                                                        | 6.78E-12         |
| 67     | I2O2 = I + OIO                                        | k = 1.00E+1                                                                                    | 1.00E+1          |
| 68     | I2O2 + O3 = IXOY                                      | k = 1.00E-12                                                                                   | 1.00E-12         |
| 69     | INO2 = I + NO2                                        | Photolysis                                                                                     | 3.21E-3          |
| 70     | INO2 + INO2 = I2 + 2 NO2                              | k = 4.70E-13 exp(-1670/T)                                                                      | 1.73E-15         |
| 71     | INO3 = I + NO3                                        | Photolysis                                                                                     | 1.25E-2          |
| 72     | INO3 + H2O = HOI + HNO3                               | k = 2.50E-22                                                                                   | 2.50E-22         |
| 73     | CLO + BRO = CL + BR                                   | k = 4.70E-12 exp(320/T)                                                                        | 1.38E-11         |
| 74     | CLO + IO = CL + I                                     | k = 4.70E-12 exp(280/T)                                                                        | 1.20E-11         |
| 75     | BRO + IO = BR + I                                     | k = 1.50E-11 exp(510/T)                                                                        | 8.31E-11         |
| 76     | CH3I = I + MEO2                                       | Photolysis                                                                                     | 3.19E-6          |
| 77     | MI2 = 2 I + FORM                                      | Photolysis                                                                                     | 4.69E-3          |
| 78     | MIB = I + BR + FORM                                   | Photolysis                                                                                     | 2.53E-4          |
| 79     | MIC = I + CL + FORM                                   | Photolysis                                                                                     | 7.48E-5          |
| 80     | MB3 = 3 BR + HO2 + CO                                 | Photolysis                                                                                     | 4.64E-7          |
| 81     | MB3 + OH = 3 BR + CO                                  | k = 1.35E-12 exp(-600/T)                                                                       | 1.80E-13         |
| 82     | MB2 + OH = 2 BR + HO2 + CO                            | k = 2.00E-12 exp(-840/T)                                                                       | 1.19E-13         |

| Number | Reactants and Products       | Rate Constant Expression     | k <sub>298</sub> |
|--------|------------------------------|------------------------------|------------------|
| 83     | MBC + OH = BR + MEO2         | $k = 2.35E-12 \exp(-1300/T)$ | 3.00E-14         |
| 84     | MBC2 + OH = BR + MEO2        | $k = 9.00E-13 \exp(-600/T)$  | 1.20E-13         |
| 85     | MB2C + OH = BR + MEO2        | $k = 9.00E-13 \exp(-600/T)$  | 1.20E-13         |
| 86     | IALK = I + ALDX + XO2H + RO2 | Photolysis                   | 5.88E-7          |
| 87     | SSCL + HNO3 = HCL + SSN3     | $k = 1.00E-12$               | 1.00E-12         |
| 88     | SSBR + HOBR = BR2            | $k = 1.00E-12$               | 1.00E-12         |

**Table S4. CAMx halogen species names and descriptions for CB6r2h.**

| Species | Description                                                  | Constituents |   |   |   |    |    |   | Mol. Wt. |
|---------|--------------------------------------------------------------|--------------|---|---|---|----|----|---|----------|
|         |                                                              | C            | H | O | N | Cl | Br | I |          |
| CL2     | Molecular chlorine                                           |              |   |   |   | 2  |    |   | 70.9     |
| CL      | Chlorine atom                                                |              |   |   |   | 1  |    |   | 35.5     |
| CLO     | Chlorine monoxide                                            |              |   | 1 |   | 1  |    |   | 51.4     |
| HCL     | Hydrogen chloride                                            |              | 1 |   |   | 1  |    |   | 36.5     |
| HOCL    | Hypochlorous acid                                            |              | 1 | 1 |   | 1  |    |   | 52.4     |
| CLN2    | Nitryl chloride: ClNO <sub>2</sub>                           |              |   | 2 |   | 1  |    |   | 81.4     |
| CLN3    | Chlorine nitrate: ClONO <sub>2</sub>                         |              |   | 3 |   | 1  |    |   | 97.4     |
| FMCL    | Formyl chloride: HC(O)Cl                                     | 1            | 1 | 1 |   | 1  |    |   | 64.5     |
| BR2     | Molecular bromine                                            |              |   |   |   |    | 2  |   | 159.8    |
| BR      | Bromine atom                                                 |              |   |   |   |    | 1  |   | 79.9     |
| BRO     | Bromine monoxide                                             |              |   | 1 |   |    | 1  |   | 95.9     |
| HBR     | Hydrogen bromide                                             |              | 1 |   |   |    | 1  |   | 80.9     |
| HOBR    | Hypobromous acid                                             |              | 1 | 1 |   |    | 1  |   | 96.9     |
| BRN2    | Nitryl bromide: BrNO <sub>2</sub>                            |              |   | 2 |   |    | 1  |   | 125.9    |
| BRN3    | Bromine nitrate: BrONO <sub>2</sub>                          |              |   | 3 |   |    | 1  |   | 141.9    |
| FMBR    | Formyl bromide: HC(O)Br                                      | 1            | 1 | 1 |   |    | 1  |   | 108.9    |
| I2      | Molecular iodine                                             |              |   |   |   |    |    | 2 | 253.8    |
| I       | Iodine atom                                                  |              |   |   |   |    |    | 1 | 126.9    |
| IO      | Iodine monoxide                                              |              |   | 1 |   |    |    | 1 | 142.9    |
| OIO     | Iodine dioxide                                               |              |   | 2 |   |    |    | 1 | 158.9    |
| I2O2    | Diiodine dioxide                                             |              |   | 2 |   |    |    | 2 | 285.8    |
| IXOY    | Condensable iodine oxides (> I <sub>2</sub> O <sub>2</sub> ) |              |   | 3 |   |    |    | 2 | 301.8    |
| HI      | Hydrogen iodide                                              |              | 1 |   |   |    |    | 1 | 127.9    |
| HOI     | Hypoiodous acid                                              |              | 1 | 1 |   |    |    | 1 | 143.9    |
| HIO3    | Iodic acid: HONO <sub>2</sub>                                |              | 1 | 3 |   |    |    | 1 | 175.9    |
| INO2    | Nitryl iodide: INO <sub>2</sub>                              |              |   | 2 |   |    |    | 1 | 172.9    |
| INO3    | Iodine nitrate: IONO <sub>2</sub>                            |              |   | 3 |   |    |    | 1 | 188.9    |
| CH3I    | Iodomethane                                                  | 1            | 3 |   |   |    |    | 1 | 141.9    |
| MI2     | Diiodomethane: CH <sub>2</sub> I <sub>2</sub>                | 1            | 2 |   |   |    |    | 2 | 267.8    |
| MIB     | Bromoiodomethane: CH <sub>2</sub> BrI                        | 1            | 2 |   |   |    | 1  | 1 | 220.8    |
| MIC     | Chloroiodomethane: CH <sub>2</sub> ClI                       | 1            | 2 |   |   | 1  |    | 1 | 176.4    |
| MBC     | Chlorobromomethane: CH <sub>2</sub> ClBr                     | 1            | 2 |   |   | 1  | 1  |   | 129.4    |
| MB2     | Dibromomethane: CH <sub>2</sub> Br <sub>2</sub>              | 1            | 2 |   |   |    | 2  |   | 173.8    |
| MBC2    | Dichlorobromomethane: CHCl <sub>2</sub> Br                   | 1            | 3 |   |   | 2  | 1  |   | 165.8    |
| MB2C    | Chlorodibromomethane: CHClBr <sub>2</sub>                    | 1            | 3 |   |   | 1  | 2  |   | 210.3    |
| MB3     | Bromoform CHBr <sub>3</sub>                                  | 1            | 1 |   |   |    | 3  |   | 252.7    |
| IALK    | Alkyl iodides                                                | 3            | 7 |   |   |    |    | 1 | 170.0    |
| SSCL    | Pseudo gas-phase species for sea salt chloride               | 0            |   |   |   | 1  |    |   | 58.4     |
| SSBR    | Pseudo gas-phase species for sea salt bromide                | 0            |   |   |   |    | 1  |   | 102.9    |
| SSN3    | Pseudo gas-phase species for sea salt nitrate                | 0            |   | 3 | 1 |    |    |   | 85.0     |

## CB6r4 Gas-Phase Chemistry

**Table S5. Reactions and rate constant expressions for the CB6r4 mechanism. See Table S2 for species names.  $k_{298}$  is the rate constant at 298 K and 1 atmosphere using units in  $\text{cm}^3 \text{molecule}^{-1} \text{s}^{-1}$ . For photolysis reactions  $k_{298}$  shows the photolysis rate at a solar zenith angle of  $60^\circ$  and height of 600 m MSL/AGL.**

| Number | Reactants and Products                                                  | Rate Constant Expression                                                                                                | $k_{298}$ |
|--------|-------------------------------------------------------------------------|-------------------------------------------------------------------------------------------------------------------------|-----------|
| 1      | $\text{NO}_2 = \text{NO} + \text{O}$                                    | Photolysis                                                                                                              | 6.30E-3   |
| 2      | $\text{O} + \text{O}_2 + \text{M} = \text{O}_3 + \text{M}$              | $k = 5.68\text{E-}34 (T/300)^{-2.6}$                                                                                    | 5.78E-34  |
| 3      | $\text{O}_3 + \text{NO} = \text{NO}_2$                                  | $k = 1.40\text{E-}12 \exp(-1310/T)$                                                                                     | 1.73E-14  |
| 4      | $\text{O} + \text{NO} + \text{M} = \text{NO}_2 + \text{M}$              | $k = 1.00\text{E-}31 (T/300)^{-1.6}$                                                                                    | 1.01E-31  |
| 5      | $\text{O} + \text{NO}_2 = \text{NO}$                                    | $k = 5.50\text{E-}12 \exp(188/T)$                                                                                       | 1.03E-11  |
| 6      | $\text{O} + \text{NO}_2 = \text{NO}_3$                                  | Falloff: $F=0.6; n=1$<br>$k(0) = 1.30\text{E-}31 (T/300)^{-1.5}$<br>$k(\text{inf}) = 2.30\text{E-}11 (T/300)^{0.24}$    | 2.11E-12  |
| 7      | $\text{O} + \text{O}_3 =$                                               | $k = 8.00\text{E-}12 \exp(-2060/T)$                                                                                     | 7.96E-15  |
| 8      | $\text{O}_3 = \text{O}$                                                 | Photolysis                                                                                                              | 3.33E-4   |
| 9      | $\text{O}_3 = \text{O}1\text{D}$                                        | Photolysis                                                                                                              | 8.78E-6   |
| 10     | $\text{O}1\text{D} + \text{M} = \text{O} + \text{M}$                    | $k = 2.23\text{E-}11 \exp(115/T)$                                                                                       | 3.28E-11  |
| 11     | $\text{O}1\text{D} + \text{H}_2\text{O} = 2 \text{OH}$                  | $k = 2.14\text{E-}10$                                                                                                   | 2.14E-10  |
| 12     | $\text{O}_3 + \text{OH} = \text{HO}_2$                                  | $k = 1.70\text{E-}12 \exp(-940/T)$                                                                                      | 7.25E-14  |
| 13     | $\text{O}_3 + \text{HO}_2 = \text{OH}$                                  | $k = 2.03\text{E-}16 (T/300)^{4.57} \exp(693/T)$                                                                        | 2.01E-15  |
| 14     | $\text{OH} + \text{O} = \text{HO}_2$                                    | $k = 2.40\text{E-}11 \exp(110/T)$                                                                                       | 3.47E-11  |
| 15     | $\text{HO}_2 + \text{O} = \text{OH}$                                    | $k = 2.70\text{E-}11 \exp(224/T)$                                                                                       | 5.73E-11  |
| 16     | $\text{OH} + \text{OH} = \text{O}$                                      | $k = 6.20\text{E-}14 (T/298)^{2.6} \exp(945/T)$                                                                         | 1.48E-12  |
| 17     | $\text{OH} + \text{OH} = \text{H}_2\text{O}_2$                          | Falloff: $F=0.5; n=1.13$<br>$k(0) = 6.90\text{E-}31 (T/300)^{-0.8}$<br>$k(\text{inf}) = 2.60\text{E-}11$                | 5.25E-12  |
| 18     | $\text{OH} + \text{HO}_2 =$                                             | $k = 4.80\text{E-}11 \exp(250/T)$                                                                                       | 1.11E-10  |
| 19     | $\text{HO}_2 + \text{HO}_2 = \text{H}_2\text{O}_2$                      | $k = k_1 + k_2 [\text{M}]$<br>$k_1 = 2.20\text{E-}13 \exp(600/T)$<br>$k_2 = 1.90\text{E-}33 \exp(980/T)$                | 2.90E-12  |
| 20     | $\text{HO}_2 + \text{HO}_2 + \text{H}_2\text{O} = \text{H}_2\text{O}_2$ | $k = k_1 + k_2 [\text{M}]$<br>$k_1 = 3.08\text{E-}34 \exp(2800/T)$<br>$k_2 = 2.66\text{E-}54 \exp(3180/T)$              | 6.53E-30  |
| 21     | $\text{H}_2\text{O}_2 = 2 \text{OH}$                                    | Photolysis                                                                                                              | 3.78E-6   |
| 22     | $\text{H}_2\text{O}_2 + \text{OH} = \text{HO}_2$                        | $k = 2.90\text{E-}12 \exp(-160/T)$                                                                                      | 1.70E-12  |
| 23     | $\text{H}_2\text{O}_2 + \text{O} = \text{OH} + \text{HO}_2$             | $k = 1.40\text{E-}12 \exp(-2000/T)$                                                                                     | 1.70E-15  |
| 24     | $\text{NO} + \text{NO} + \text{O}_2 = 2 \text{NO}_2$                    | $k = 3.30\text{E-}39 \exp(530/T)$                                                                                       | 1.95E-38  |
| 25     | $\text{HO}_2 + \text{NO} = \text{OH} + \text{NO}_2$                     | $k = 3.45\text{E-}12 \exp(270/T)$                                                                                       | 8.54E-12  |
| 26     | $\text{NO}_2 + \text{O}_3 = \text{NO}_3$                                | $k = 1.40\text{E-}13 \exp(-2470/T)$                                                                                     | 3.52E-17  |
| 27     | $\text{NO}_3 = \text{NO}_2 + \text{O}$                                  | Photolysis                                                                                                              | 1.56E-1   |
| 28     | $\text{NO}_3 = \text{NO}$                                               | Photolysis                                                                                                              | 1.98E-2   |
| 29     | $\text{NO}_3 + \text{NO} = 2 \text{NO}_2$                               | $k = 1.80\text{E-}11 \exp(110/T)$                                                                                       | 2.60E-11  |
| 30     | $\text{NO}_3 + \text{NO}_2 = \text{NO} + \text{NO}_2$                   | $k = 4.50\text{E-}14 \exp(-1260/T)$                                                                                     | 6.56E-16  |
| 31     | $\text{NO}_3 + \text{O} = \text{NO}_2$                                  | $k = 1.70\text{E-}11$                                                                                                   | 1.70E-11  |
| 32     | $\text{NO}_3 + \text{OH} = \text{HO}_2 + \text{NO}_2$                   | $k = 2.00\text{E-}11$                                                                                                   | 2.00E-11  |
| 33     | $\text{NO}_3 + \text{HO}_2 = \text{OH} + \text{NO}_2$                   | $k = 4.00\text{E-}12$                                                                                                   | 4.00E-12  |
| 34     | $\text{NO}_3 + \text{O}_3 = \text{NO}_2$                                | $k = 1.00\text{E-}17$                                                                                                   | 1.00E-17  |
| 35     | $\text{NO}_3 + \text{NO}_3 = 2 \text{NO}_2$                             | $k = 8.50\text{E-}13 \exp(-2450/T)$                                                                                     | 2.28E-16  |
| 36     | $\text{NO}_3 + \text{NO}_2 = \text{N}_2\text{O}_5$                      | Falloff: $F=0.35; n=1.33$<br>$k(0) = 3.60\text{E-}30 (T/300)^{-4.1}$<br>$k(\text{inf}) = 1.90\text{E-}12 (T/300)^{0.2}$ | 1.24E-12  |

| Number | Reactants and Products                                                        | Rate Constant Expression                                                                                                                  | k <sub>298</sub> |
|--------|-------------------------------------------------------------------------------|-------------------------------------------------------------------------------------------------------------------------------------------|------------------|
| 37     | N2O5 = NO3 + NO2                                                              | Falloff: F=0.35; n=1.33<br>k(0) = 1.30E-3 (T/300) <sup>-3.5</sup> exp(-11000/T)<br>k(inf) = 9.70E+14 (T/300) <sup>0.1</sup> exp(-11080/T) | 4.46E-2          |
| 38     | N2O5 = NO2 + NO3                                                              | Photolysis                                                                                                                                | 2.52E-5          |
| 39     | N2O5 + H2O = 2 HNO3                                                           | k = 1.00E-22                                                                                                                              | 1.00E-22         |
| 40     | NO + OH = HONO                                                                | Falloff: F=0.81; n=0.87<br>k(0) = 7.40E-31 (T/300) <sup>-2.4</sup><br>k(inf) = 3.30E-11 (T/300) <sup>-0.3</sup>                           | 9.77E-12         |
| 41     | NO + NO2 + H2O = 2 HONO                                                       | k = 5.00E-40                                                                                                                              | 5.00E-40         |
| 42     | HONO + HONO = NO + NO2                                                        | k = 1.00E-20                                                                                                                              | 1.00E-20         |
| 43     | HONO = NO + OH                                                                | Photolysis                                                                                                                                | 1.04E-3          |
| 44     | HONO + OH = NO2                                                               | k = 2.50E-12 exp(260/T)                                                                                                                   | 5.98E-12         |
| 45     | NO2 + OH = HNO3                                                               | Falloff: F=0.6; n=1<br>k(0) = 1.80E-30 (T/300) <sup>-3</sup><br>k(inf) = 2.80E-11                                                         | 1.06E-11         |
| 46     | HNO3 + OH = NO3                                                               | k = k1 + k3 [M] / (1 + k3 [M] / k2)<br>k1 = 2.40E-14 exp(460/T)<br>k2 = 2.70E-17 exp(2199/T)<br>k3 = 6.50E-34 exp(1335/T)                 | 1.54E-13         |
| 47     | HNO3 = OH + NO2                                                               | Photolysis                                                                                                                                | 2.54E-7          |
| 48     | HO2 + NO2 = PNA                                                               | Falloff: F=0.6; n=1<br>k(0) = 1.80E-31 (T/300) <sup>-3.2</sup><br>k(inf) = 4.70E-12                                                       | 1.38E-12         |
| 49     | PNA = HO2 + NO2                                                               | Falloff: F=0.6; n=1<br>k(0) = 4.10E-5 exp(-10650/T)<br>k(inf) = 4.80E+15 exp(-11170/T)                                                    | 8.31E-2          |
| 50     | PNA = 0.59 HO2 + 0.59 NO2 + 0.41 OH + 0.41 NO3                                | Photolysis                                                                                                                                | 2.36E-6          |
| 51     | PNA + OH = NO2                                                                | k = 3.20E-13 exp(690/T)                                                                                                                   | 3.24E-12         |
| 52     | SO2 + OH = SULF + HO2                                                         | Falloff: F=0.53; n=1.1<br>k(0) = 4.50E-31 (T/300) <sup>-3.9</sup><br>k(inf) = 1.30E-12 (T/300) <sup>-0.7</sup>                            | 8.12E-13         |
| 53     | C2O3 + NO = NO2 + MEO2 + RO2                                                  | k = 7.50E-12 exp(290/T)                                                                                                                   | 1.98E-11         |
| 54     | C2O3 + NO2 = PAN                                                              | Falloff: F=0.3; n=1.41<br>k(0) = 2.70E-28 (T/300) <sup>-7.1</sup><br>k(inf) = 1.20E-11 (T/300) <sup>-0.9</sup>                            | 9.40E-12         |
| 55     | PAN = NO2 + C2O3                                                              | Falloff: F=0.3; n=1.41<br>k(0) = 4.90E-3 exp(-12100/T)<br>k(inf) = 5.40E+16 exp(-13830/T)                                                 | 2.98E-4          |
| 56     | PAN = 0.6 NO2 + 0.6 C2O3 + 0.4 NO3 + 0.4 MEO2 + 0.4 RO2                       | Photolysis                                                                                                                                | 3.47E-7          |
| 57     | C2O3 + HO2 = 0.41 PACD + 0.15 AACD + 0.15 O3 + 0.44 MEO2 + 0.44 RO2 + 0.44 OH | k = 5.20E-13 exp(980/T)                                                                                                                   | 1.39E-11         |
| 58     | C2O3 + RO2 = C2O3                                                             | k = 8.90E-13 exp(800/T)                                                                                                                   | 1.30E-11         |
| 59     | C2O3 + C2O3 = 2 MEO2 + 2 RO2                                                  | k = 2.90E-12 exp(500/T)                                                                                                                   | 1.55E-11         |
| 60     | C2O3 + CXO3 = MEO2 + ALD2 + XO2H + 2 RO2                                      | k = 2.90E-12 exp(500/T)                                                                                                                   | 1.55E-11         |
| 61     | CXO3 + NO = NO2 + ALD2 + XO2H + RO2                                           | k = 6.70E-12 exp(340/T)                                                                                                                   | 2.10E-11         |
| 62     | CXO3 + NO2 = PANX                                                             | k = k(ref)/K<br>k(ref) = k(54)<br>K = 1.00E+0                                                                                             | 9.40E-12         |
| 63     | PANX = NO2 + CXO3                                                             | k = k(ref)/K<br>k(ref) = k(55)<br>K = 1.00E+0                                                                                             | 2.98E-4          |

| Number | Reactants and Products                                                                                                                                             | Rate Constant Expression                      | k <sub>298</sub> |
|--------|--------------------------------------------------------------------------------------------------------------------------------------------------------------------|-----------------------------------------------|------------------|
| 64     | PANX = 0.6 NO <sub>2</sub> + 0.6 CXO <sub>3</sub> + 0.4 NO <sub>3</sub> + 0.4 ALD <sub>2</sub> + 0.4 XO <sub>2</sub> H + 0.4 RO <sub>2</sub>                       | Photolysis                                    | 3.47E-7          |
| 65     | CXO <sub>3</sub> + HO <sub>2</sub> = 0.41 PACD + 0.15 AACD + 0.15 O <sub>3</sub> + 0.44 ALD <sub>2</sub> + 0.44 XO <sub>2</sub> H + 0.44 RO <sub>2</sub> + 0.44 OH | k = 5.20E-13 exp(980/T)                       | 1.39E-11         |
| 66     | CXO <sub>3</sub> + RO <sub>2</sub> = 0.8 ALD <sub>2</sub> + 0.8 XO <sub>2</sub> H + 0.8 RO <sub>2</sub>                                                            | k = 8.90E-13 exp(800/T)                       | 1.30E-11         |
| 67     | CXO <sub>3</sub> + CXO <sub>3</sub> = 2 ALD <sub>2</sub> + 2 XO <sub>2</sub> H + 2 RO <sub>2</sub>                                                                 | k = 3.20E-12 exp(500/T)                       | 1.71E-11         |
| 68     | RO <sub>2</sub> + NO = NO                                                                                                                                          | k = 2.40E-12 exp(360/T)                       | 8.03E-12         |
| 69     | RO <sub>2</sub> + HO <sub>2</sub> = HO <sub>2</sub>                                                                                                                | k = 4.80E-13 exp(800/T)                       | 7.03E-12         |
| 70     | RO <sub>2</sub> + RO <sub>2</sub> =                                                                                                                                | k = 6.50E-14 exp(500/T)                       | 3.48E-13         |
| 71     | MEO <sub>2</sub> + NO = FORM + HO <sub>2</sub> + NO <sub>2</sub>                                                                                                   | k = 2.30E-12 exp(360/T)                       | 7.70E-12         |
| 72     | MEO <sub>2</sub> + HO <sub>2</sub> = 0.9 MEPX + 0.1 FORM                                                                                                           | k = 3.80E-13 exp(780/T)                       | 5.21E-12         |
| 73     | MEO <sub>2</sub> + C <sub>2</sub> O <sub>3</sub> = FORM + 0.9 HO <sub>2</sub> + 0.9 MEO <sub>2</sub> + 0.1 AACD + 0.9 RO <sub>2</sub>                              | k = 2.00E-12 exp(500/T)                       | 1.07E-11         |
| 74     | MEO <sub>2</sub> + RO <sub>2</sub> = 0.685 FORM + 0.315 MEOH + 0.37 HO <sub>2</sub> + RO <sub>2</sub>                                                              | k = k(ref)/K<br>k(ref) = k(70)<br>K = 1.00E+0 | 3.48E-13         |
| 75     | XO <sub>2</sub> H + NO = NO <sub>2</sub> + HO <sub>2</sub>                                                                                                         | k = 2.70E-12 exp(360/T)                       | 9.04E-12         |
| 76     | XO <sub>2</sub> H + HO <sub>2</sub> = ROOH                                                                                                                         | k = 6.80E-13 exp(800/T)                       | 9.96E-12         |
| 77     | XO <sub>2</sub> H + C <sub>2</sub> O <sub>3</sub> = 0.8 HO <sub>2</sub> + 0.8 MEO <sub>2</sub> + 0.2 AACD + 0.8 RO <sub>2</sub>                                    | k = k(ref)/K<br>k(ref) = k(58)<br>K = 1.00E+0 | 1.30E-11         |
| 78     | XO <sub>2</sub> H + RO <sub>2</sub> = 0.6 HO <sub>2</sub> + RO <sub>2</sub>                                                                                        | k = k(ref)/K<br>k(ref) = k(70)<br>K = 1.00E+0 | 3.48E-13         |
| 79     | XO <sub>2</sub> + NO = NO <sub>2</sub>                                                                                                                             | k = k(ref)/K<br>k(ref) = k(75)<br>K = 1.00E+0 | 9.04E-12         |
| 80     | XO <sub>2</sub> + HO <sub>2</sub> = ROOH                                                                                                                           | k = k(ref)/K<br>k(ref) = k(76)<br>K = 1.00E+0 | 9.96E-12         |
| 81     | XO <sub>2</sub> + C <sub>2</sub> O <sub>3</sub> = 0.8 MEO <sub>2</sub> + 0.2 AACD + 0.8 RO <sub>2</sub>                                                            | k = k(ref)/K<br>k(ref) = k(58)<br>K = 1.00E+0 | 1.30E-11         |
| 82     | XO <sub>2</sub> + RO <sub>2</sub> = RO <sub>2</sub>                                                                                                                | k = k(ref)/K<br>k(ref) = k(70)<br>K = 1.00E+0 | 3.48E-13         |
| 83     | XO <sub>2</sub> N + NO = 0.5 NTR <sub>1</sub> + 0.5 NTR <sub>2</sub>                                                                                               | k = k(ref)/K<br>k(ref) = k(75)<br>K = 1.00E+0 | 9.04E-12         |
| 84     | XO <sub>2</sub> N + HO <sub>2</sub> = ROOH                                                                                                                         | k = k(ref)/K<br>k(ref) = k(76)<br>K = 1.00E+0 | 9.96E-12         |
| 85     | XO <sub>2</sub> N + C <sub>2</sub> O <sub>3</sub> = 0.8 HO <sub>2</sub> + 0.8 MEO <sub>2</sub> + 0.2 AACD + 0.8 RO <sub>2</sub>                                    | k = k(ref)/K<br>k(ref) = k(58)<br>K = 1.00E+0 | 1.30E-11         |
| 86     | XO <sub>2</sub> N + RO <sub>2</sub> = RO <sub>2</sub>                                                                                                              | k = k(ref)/K<br>k(ref) = k(70)<br>K = 1.00E+0 | 3.48E-13         |
| 87     | MEPX + OH = 0.6 MEO <sub>2</sub> + 0.6 RO <sub>2</sub> + 0.4 FORM + 0.4 OH                                                                                         | k = 5.30E-12 exp(190/T)                       | 1.00E-11         |
| 88     | MEPX = MEO <sub>2</sub> + RO <sub>2</sub> + OH                                                                                                                     | Photolysis                                    | 2.68E-6          |
| 89     | ROOH + OH = 0.54 XO <sub>2</sub> H + 0.06 XO <sub>2</sub> N + 0.6 RO <sub>2</sub> + 0.4 OH                                                                         | k = 5.30E-12 exp(190/T)                       | 1.00E-11         |

| Number | Reactants and Products                                                                       | Rate Constant Expression                          | k <sub>298</sub> |
|--------|----------------------------------------------------------------------------------------------|---------------------------------------------------|------------------|
| 90     | ROOH = HO2 + OH                                                                              | Photolysis                                        | 2.68E-6          |
| 91     | NTR1 + OH = NTR2                                                                             | k = 2.00E-12                                      | 2.00E-12         |
| 92     | NTR1 = NO2                                                                                   | Photolysis                                        | 1.06E-6          |
| 93     | FACD + OH = HO2                                                                              | k = 4.50E-13                                      | 4.50E-13         |
| 94     | AACD + OH = MEO2 + RO2                                                                       | k = 4.00E-14 exp(850/T)                           | 6.93E-13         |
| 95     | PACD + OH = C2O3                                                                             | k = 5.30E-12 exp(190/T)                           | 1.00E-11         |
| 96     | FORM + OH = HO2 + CO                                                                         | k = 5.40E-12 exp(135/T)                           | 8.49E-12         |
| 97     | FORM = 2 HO2 + CO                                                                            | Photolysis                                        | 1.78E-5          |
| 98     | FORM = CO + H2                                                                               | Photolysis                                        | 2.38E-5          |
| 99     | FORM + NO3 = HNO3 + HO2 + CO                                                                 | k = 5.50E-16                                      | 5.50E-16         |
| 100    | FORM + HO2 = HCO3                                                                            | k = 9.70E-15 exp(625/T)                           | 7.90E-14         |
| 101    | HCO3 = FORM + HO2                                                                            | k = 2.40E+12 exp(-7000/T)                         | 1.51E+2          |
| 102    | HCO3 + NO = FACD + NO2 + HO2                                                                 | k = 5.60E-12                                      | 5.60E-12         |
| 103    | HCO3 + HO2 = 0.5 MEPX + 0.5 FACD + 0.2 OH + 0.2 HO2                                          | k = 5.60E-15 exp(2300/T)                          | 1.26E-11         |
| 104    | ALD2 + OH = C2O3                                                                             | k = 4.70E-12 exp(345/T)                           | 1.50E-11         |
| 105    | ALD2 + NO3 = C2O3 + HNO3                                                                     | k = 1.40E-12 exp(-1860/T)                         | 2.73E-15         |
| 106    | ALD2 = MEO2 + RO2 + CO + HO2                                                                 | Photolysis                                        | 1.76E-6          |
| 107    | ALDX + OH = CXO3                                                                             | k = 4.90E-12 exp(405/T)                           | 1.91E-11         |
| 108    | ALDX + NO3 = CXO3 + HNO3                                                                     | k = 6.30E-15                                      | 6.30E-15         |
| 109    | ALDX = ALD2 + XO2H + RO2 + CO + HO2                                                          | Photolysis                                        | 6.96E-6          |
| 110    | GLYD + OH = 0.2 GLY + 0.2 HO2 + 0.8 C2O3                                                     | k = 8.00E-12                                      | 8.00E-12         |
| 111    | GLYD = 0.74 FORM + 0.89 CO + 1.4 HO2 + 0.15 MEOH + 0.19 OH + 0.11 GLY + 0.11 XO2H + 0.11 RO2 | Photolysis                                        | 1.56E-6          |
| 112    | GLYD + NO3 = HNO3 + C2O3                                                                     | k = 1.40E-12 exp(-1860/T)                         | 2.73E-15         |
| 113    | GLY + OH = 1.8 CO + 0.2 XO2 + 0.2 RO2 + HO2                                                  | k = 3.10E-12 exp(340/T)                           | 9.70E-12         |
| 114    | GLY = 2 HO2 + 2 CO                                                                           | Photolysis                                        | 5.50E-5          |
| 115    | GLY + NO3 = HNO3 + 1.5 CO + 0.5 XO2 + 0.5 RO2 + HO2                                          | k = 1.40E-12 exp(-1860/T)                         | 2.73E-15         |
| 116    | MGLY = C2O3 + HO2 + CO                                                                       | Photolysis                                        | 1.46E-4          |
| 117    | MGLY + NO3 = HNO3 + C2O3 + XO2 + RO2                                                         | k = 1.40E-12 exp(-1860/T)                         | 2.73E-15         |
| 118    | MGLY + OH = C2O3 + CO                                                                        | k = 1.90E-12 exp(575/T)                           | 1.31E-11         |
| 119    | H2 + OH = HO2                                                                                | k = 7.70E-12 exp(-2100/T)                         | 6.70E-15         |
| 120    | CO + OH = HO2                                                                                | k = k1 + k2 [M]<br>k1 = 1.44E-13<br>k2 = 3.43E-33 | 2.28E-13         |
| 121    | CH4 + OH = MEO2 + RO2                                                                        | k = 1.85E-12 exp(-1690/T)                         | 6.37E-15         |
| 122    | ETHA + OH = 0.991 ALD2 + 0.991 XO2H + 0.009 XO2N + RO2                                       | k = 6.90E-12 exp(-1000/T)                         | 2.41E-13         |
| 123    | MEOH + OH = FORM + HO2                                                                       | k = 2.85E-12 exp(-345/T)                          | 8.95E-13         |
| 124    | ETOH + OH = 0.95 ALD2 + 0.9 HO2 + 0.1 XO2H + 0.1 RO2 + 0.078 FORM + 0.011 GLYD               | k = 3.00E-12 exp(20/T)                            | 3.21E-12         |
| 125    | KET = 0.5 ALD2 + 0.5 C2O3 + 0.5 XO2H + 0.5 CXO3 + 0.5 MEO2 + RO2 - 2.5 PAR                   | Photolysis                                        | 2.27E-7          |
| 126    | ACET = 0.38 CO + 1.38 MEO2 + 1.38 RO2 + 0.62 C2O3                                            | Photolysis                                        | 2.08E-7          |
| 127    | ACET + OH = FORM + C2O3 + XO2 + RO2                                                          | k = 1.41E-12 exp(-620.6/T)                        | 1.76E-13         |
| 128    | PRPA + OH = XPRP                                                                             | k = 7.60E-12 exp(-585/T)                          | 1.07E-12         |
| 129    | PAR + OH = XPAR                                                                              | k = 8.10E-13                                      | 8.10E-13         |



| Number | Reactants and Products                                                                                                                                                         | Rate Constant Expression                                                                                  | k <sub>298</sub> |
|--------|--------------------------------------------------------------------------------------------------------------------------------------------------------------------------------|-----------------------------------------------------------------------------------------------------------|------------------|
| 130    | ROR = 0.2 KET + 0.42 ACET + 0.74 ALD2 + 0.37 ALDX + 0.04 XO2N + 0.94 XO2H + 0.98 RO2 + 0.02 ROR - 2.7 PAR                                                                      | $k = 5.70E+12 \exp(-5780/T)$                                                                              | 2.15E+4          |
| 131    | ROR + O2 = KET + HO2                                                                                                                                                           | $k = 1.50E-14 \exp(-200/T)$                                                                               | 7.67E-15         |
| 132    | ROR + NO2 = NTR1                                                                                                                                                               | $k = 8.60E-12 \exp(400/T)$                                                                                | 3.29E-11         |
| 133    | ETHY + OH = 0.7 GLY + 0.7 OH + 0.3 FACD + 0.3 CO + 0.3 HO2                                                                                                                     | Falloff: F=0.37; n=1.3<br>$k(0) = 5.00E-30 (T/300)^{-1.5}$<br>$k(\text{inf}) = 1.00E-12$                  | 7.52E-13         |
| 134    | ETH + OH = XO2H + RO2 + 1.56 FORM + 0.22 GLYD                                                                                                                                  | Falloff: F=0.48; n=1.15<br>$k(0) = 8.60E-29 (T/300)^{-3.1}$<br>$k(\text{inf}) = 9.00E-12 (T/300)^{-0.85}$ | 7.84E-12         |
| 135    | ETH + O3 = FORM + 0.51 CO + 0.16 HO2 + 0.16 OH + 0.37 FACD                                                                                                                     | $k = 9.10E-15 \exp(-2580/T)$                                                                              | 1.58E-18         |
| 136    | ETH + NO3 = 0.5 NO2 + 0.5 NTR1 + 0.5 XO2H + 0.5 XO2 + RO2 + 1.125 FORM                                                                                                         | $k = 3.30E-12 \exp(-2880/T)$                                                                              | 2.10E-16         |
| 137    | OLE + OH = 0.781 FORM + 0.488 ALD2 + 0.488 ALDX + 0.976 XO2H + 0.195 XO2 + 0.024 XO2N + 1.195 RO2 - 0.73 PAR                                                                   | Falloff: F=0.5; n=1.13<br>$k(0) = 8.00E-27 (T/300)^{-3.5}$<br>$k(\text{inf}) = 3.00E-11 (T/300)^{-1}$     | 2.86E-11         |
| 138    | OLE + O3 = 0.295 ALD2 + 0.555 FORM + 0.27 ALDX + 0.15 XO2H + 0.15 RO2 + 0.334 OH + 0.08 HO2 + 0.378 CO + 0.075 GLY + 0.075 MGLY + 0.09 FACD + 0.13 AACD + 0.04 H2O2 - 0.79 PAR | $k = 5.50E-15 \exp(-1880/T)$                                                                              | 1.00E-17         |
| 139    | OLE + NO3 = 0.5 NO2 + 0.5 NTR1 + 0.48 XO2 + 0.48 XO2H + 0.04 XO2N + RO2 + 0.5 FORM + 0.25 ALD2 + 0.375 ALDX - 1 PAR                                                            | $k = 4.60E-13 \exp(-1155/T)$                                                                              | 9.54E-15         |
| 140    | IOLE + OH = 1.3 ALD2 + 0.7 ALDX + XO2H + RO2                                                                                                                                   | $k = 1.05E-11 \exp(519/T)$                                                                                | 5.99E-11         |
| 141    | IOLE + O3 = 0.732 ALD2 + 0.442 ALDX + 0.128 FORM + 0.245 CO + 0.5 OH + 0.3 XO2H + 0.3 RO2 + 0.24 GLY + 0.06 MGLY + 0.29 PAR + 0.08 AACD + 0.08 H2O2                            | $k = 4.70E-15 \exp(-1013/T)$                                                                              | 1.57E-16         |
| 142    | IOLE + NO3 = 0.5 NO2 + 0.5 NTR1 + 0.48 XO2 + 0.48 XO2H + 0.04 XO2N + RO2 + 0.5 ALD2 + 0.625 ALDX + PAR                                                                         | $k = 3.70E-13$                                                                                            | 3.70E-13         |
| 143    | ISOP + OH = ISO2 + RO2                                                                                                                                                         | $k = 2.70E-11 \exp(390/T)$                                                                                | 9.99E-11         |
| 144    | ISO2 + NO = 0.1 INTR + 0.9 NO2 + 0.673 FORM + 0.9 ISPD + 0.818 HO2 + 0.082 XO2H + 0.082 RO2                                                                                    | $k = 2.39E-12 \exp(365/T)$                                                                                | 8.13E-12         |
| 145    | ISO2 + HO2 = 0.88 ISPX + 0.12 OH + 0.12 HO2 + 0.12 FORM + 0.12 ISPD                                                                                                            | $k = 7.43E-13 \exp(700/T)$                                                                                | 7.78E-12         |
| 146    | ISO2 + C2O3 = 0.598 FORM + 1 ISPD + 0.728 HO2 + 0.072 XO2H + 0.8 MEO2 + 0.2 AACD + 0.872 RO2                                                                                   | $k = k(\text{ref})/K$<br>$k(\text{ref}) = k(58)$<br>$K = 1.00E+0$                                         | 1.30E-11         |
| 147    | ISO2 + RO2 = 0.598 FORM + 1 ISPD + 0.728 HO2 + 0.072 XO2H + 1.072 RO2                                                                                                          | $k = k(\text{ref})/K$<br>$k(\text{ref}) = k(70)$<br>$K = 1.00E+0$                                         | 3.48E-13         |
| 148    | ISO2 = HO2 + HPLD                                                                                                                                                              | $k = 3.30E+9 \exp(-8300/T)$                                                                               | 2.64E-3          |
| 149    | ISOP + O3 = 0.6 FORM + 0.65 ISPD + 0.15 ALDX + 0.2 CXO3 + 0.35 PAR + 0.266 OH + 0.2 XO2 + 0.2 RO2 + 0.066 HO2 + 0.066 CO                                                       | $k = 1.03E-14 \exp(-1995/T)$                                                                              | 1.27E-17         |
| 150    | ISOP + NO3 = 0.35 NO2 + 0.65 NTR2 + 0.64 XO2H + 0.33 XO2 + 0.03 XO2N + RO2 + 0.35 FORM + 0.35 ISPD                                                                             | $k = 3.03E-12 \exp(-448/T)$                                                                               | 6.74E-13         |

| Number | Reactants and Products                                                                                                                                             | Rate Constant Expression                      | k <sub>298</sub> |
|--------|--------------------------------------------------------------------------------------------------------------------------------------------------------------------|-----------------------------------------------|------------------|
| 151    | ISPD + OH = 0.022 XO2N + 0.521 XO2 + 0.115 MGLY + 0.115 MEO2 + 0.269 GLYD + 0.269 C2O3 + 0.457 OPO3 + 0.117 PAR + 0.137 ACET + 0.137 CO + 0.137 HO2 + 0.658 RO2    | k = 5.58E-12 exp(511/T)                       | 3.10E-11         |
| 152    | ISPD + O3 = 0.04 ALD2 + 0.231 FORM + 0.531 MGLY + 0.17 GLY + 0.17 ACET + 0.543 CO + 0.461 OH + 0.15 FACD + 0.398 HO2 + 0.143 C2O3                                  | k = 3.88E-15 exp(-1770/T)                     | 1.02E-17         |
| 153    | ISPD + NO3 = 0.717 HNO3 + 0.142 NTR2 + 0.142 NO2 + 0.142 XO2 + 0.142 XO2H + 0.113 GLYD + 0.113 MGLY + 0.717 PAR + 0.717 CXO3 + 0.284 RO2                           | k = 4.10E-12 exp(-1860/T)                     | 7.98E-15         |
| 154    | ISPD = 0.76 HO2 + 0.34 XO2H + 0.16 XO2 + 0.34 MEO2 + 0.208 C2O3 + 0.26 FORM + 0.24 OLE + 0.24 PAR + 0.17 ACET + 0.128 GLYD + 0.84 RO2                              | Photolysis                                    | 1.60E-5          |
| 155    | ISPX + OH = 0.904 EPOX + 0.933 OH + 0.067 ISO2 + 0.067 RO2 + 0.029 IOLE + 0.029 ALDX                                                                               | k = 2.23E-11 exp(372/T)                       | 7.77E-11         |
| 156    | HPLD = OH + ISPD                                                                                                                                                   | Photolysis                                    | 4.41E-4          |
| 157    | HPLD + NO3 = HNO3 + ISPD                                                                                                                                           | k = 6.00E-12 exp(-1860/T)                     | 1.17E-14         |
| 158    | EPOX + OH = EPX2 + RO2                                                                                                                                             | k = 5.78E-11 exp(-400/T)                      | 1.51E-11         |
| 159    | EPX2 + HO2 = 0.275 GLYD + 0.275 GLY + 0.275 MGLY + 1.125 OH + 0.825 HO2 + 0.375 FORM + 0.074 FACD + 0.251 CO + 2.175 PAR                                           | k = 7.43E-13 exp(700/T)                       | 7.78E-12         |
| 160    | EPX2 + NO = 0.275 GLYD + 0.275 GLY + 0.275 MGLY + 0.125 OH + 0.825 HO2 + 0.375 FORM + NO2 + 0.251 CO + 2.175 PAR                                                   | k = 2.39E-12 exp(365/T)                       | 8.13E-12         |
| 161    | EPX2 + C2O3 = 0.22 GLYD + 0.22 GLY + 0.22 MGLY + 0.1 OH + 0.66 HO2 + 0.3 FORM + 0.2 CO + 1.74 PAR + 0.8 MEO2 + 0.2 AACD + 0.8 RO2                                  | k = k(ref)/K<br>k(ref) = k(58)<br>K = 1.00E+0 | 1.30E-11         |
| 162    | EPX2 + RO2 = 0.275 GLYD + 0.275 GLY + 0.275 MGLY + 0.125 OH + 0.825 HO2 + 0.375 FORM + 0.251 CO + 2.175 PAR + RO2                                                  | k = k(ref)/K<br>k(ref) = k(70)<br>K = 1.00E+0 | 3.48E-13         |
| 163    | INTR + OH = 0.63 XO2 + 0.37 XO2H + RO2 + 0.444 NO2 + 0.185 NO3 + 0.104 INTR + 0.592 FORM + 0.331 GLYD + 0.185 FACD + 2.7 PAR + 0.098 OLE + 0.078 ALDX + 0.266 NTR2 | k = 3.10E-11                                  | 3.10E-11         |
| 164    | TERP + OH = 0.75 XO2H + 0.5 XO2 + 0.25 XO2N + 1.5 RO2 + 0.28 FORM + 1.66 PAR + 0.47 ALDX                                                                           | k = 1.50E-11 exp(449/T)                       | 6.77E-11         |
| 165    | TERP + O3 = 0.57 OH + 0.07 XO2H + 0.69 XO2 + 0.18 XO2N + 0.94 RO2 + 0.24 FORM + 0.001 CO + 7 PAR + 0.21 ALDX + 0.39 CXO3                                           | k = 1.20E-15 exp(-821/T)                      | 7.63E-17         |
| 166    | TERP + NO3 = 0.47 NO2 + 0.28 XO2H + 0.75 XO2 + 0.25 XO2N + 1.28 RO2 + 0.47 ALDX + 0.53 NTR2                                                                        | k = 3.70E-12 exp(175/T)                       | 6.66E-12         |
| 167    | BENZ + OH = 0.53 CRES + 0.352 BZO2 + 0.352 RO2 + 0.118 OPEN + 0.118 OH + 0.53 HO2                                                                                  | k = 2.30E-12 exp(-190/T)                      | 1.22E-12         |

| Number | Reactants and Products                                                                                     | Rate Constant Expression                      | k <sub>298</sub> |
|--------|------------------------------------------------------------------------------------------------------------|-----------------------------------------------|------------------|
| 168    | BZO2 + NO = 0.918 NO2 + 0.082 NTR2 + 0.918 GLY + 0.918 OPEN + 0.918 HO2                                    | k = 2.70E-12 exp(360/T)                       | 9.04E-12         |
| 169    | BZO2 + C2O3 = GLY + OPEN + HO2 + MEO2 + RO2                                                                | k = k(ref)/K<br>k(ref) = k(58)<br>K = 1.00E+0 | 1.30E-11         |
| 170    | BZO2 + HO2 =                                                                                               | k = 1.90E-13 exp(1300/T)                      | 1.49E-11         |
| 171    | BZO2 + RO2 = GLY + OPEN + HO2 + RO2                                                                        | k = k(ref)/K<br>k(ref) = k(70)<br>K = 1.00E+0 | 3.48E-13         |
| 172    | TOL + OH = 0.18 CRES + 0.65 TO2 + 0.72 RO2 + 0.1 OPEN + 0.1 OH + 0.07 XO2H + 0.18 HO2                      | k = 1.80E-12 exp(340/T)                       | 5.63E-12         |
| 173    | TO2 + NO = 0.86 NO2 + 0.14 NTR2 + 0.417 GLY + 0.443 MGLY + 0.66 OPEN + 0.2 XOPN + 0.86 HO2                 | k = 2.70E-12 exp(360/T)                       | 9.04E-12         |
| 174    | TO2 + C2O3 = 0.48 GLY + 0.52 MGLY + 0.77 OPEN + 0.23 XOPN + HO2 + MEO2 + RO2                               | k = k(ref)/K<br>k(ref) = k(58)<br>K = 1.00E+0 | 1.30E-11         |
| 175    | TO2 + HO2 =                                                                                                | k = 1.90E-13 exp(1300/T)                      | 1.49E-11         |
| 176    | TO2 + RO2 = 0.48 GLY + 0.52 MGLY + 0.77 OPEN + 0.23 XOPN + HO2 + RO2                                       | k = k(ref)/K<br>k(ref) = k(70)<br>K = 1.00E+0 | 3.48E-13         |
| 177    | XYL + OH = 0.155 CRES + 0.544 XLO2 + 0.602 RO2 + 0.244 XOPN + 0.244 OH + 0.058 XO2H + 0.155 HO2            | k = 1.85E-11                                  | 1.85E-11         |
| 178    | XLO2 + NO = 0.86 NO2 + 0.14 NTR2 + 0.221 GLY + 0.675 MGLY + 0.3 OPEN + 0.56 XOPN + 0.86 HO2                | k = 2.70E-12 exp(360/T)                       | 9.04E-12         |
| 179    | XLO2 + HO2 =                                                                                               | k = 1.90E-13 exp(1300/T)                      | 1.49E-11         |
| 180    | XLO2 + C2O3 = 0.26 GLY + 0.77 MGLY + 0.35 OPEN + 0.65 XOPN + HO2 + MEO2 + RO2                              | k = k(ref)/K<br>k(ref) = k(58)<br>K = 1.00E+0 | 1.30E-11         |
| 181    | XLO2 + RO2 = 0.26 GLY + 0.77 MGLY + 0.35 OPEN + 0.65 XOPN + HO2 + RO2                                      | k = k(ref)/K<br>k(ref) = k(70)<br>K = 1.00E+0 | 3.48E-13         |
| 182    | CRES + OH = 0.025 GLY + 0.025 OPEN + HO2 + 0.2 CRO + 0.732 CAT1 + 0.02 XO2N + 0.02 RO2                     | k = 1.70E-12 exp(950/T)                       | 4.12E-11         |
| 183    | CRES + NO3 = 0.3 CRO + HNO3 + 0.48 XO2 + 0.12 XO2H + 0.24 GLY + 0.24 MGLY + 0.48 OPO3 + 0.1 XO2N + 0.7 RO2 | k = 1.40E-11                                  | 1.40E-11         |
| 184    | CRO + NO2 = CRON                                                                                           | k = 2.10E-12                                  | 2.10E-12         |
| 185    | CRO + HO2 = CRES                                                                                           | k = 5.50E-12                                  | 5.50E-12         |
| 186    | CRON + OH = NTR2 + 0.5 CRO                                                                                 | k = 1.53E-12                                  | 1.53E-12         |
| 187    | CRON + NO3 = NTR2 + 0.5 CRO + HNO3                                                                         | k = 3.80E-12                                  | 3.80E-12         |
| 188    | CRON = HONO + HO2 + FORM + OPEN                                                                            | Photolysis                                    | 9.45E-5          |
| 189    | XOPN = 0.4 GLY + XO2H + 0.7 HO2 + 0.7 CO + 0.3 C2O3                                                        | Photolysis                                    | 5.04E-4          |
| 190    | XOPN + OH = MGLY + 0.4 GLY + 2 XO2H + 2 RO2                                                                | k = 9.00E-11                                  | 9.00E-11         |
| 191    | XOPN + O3 = 1.2 MGLY + 0.5 OH + 0.6 C2O3 + 0.1 ALD2 + 0.5 CO + 0.3 XO2H + 0.3 RO2                          | k = 1.08E-16 exp(-500/T)                      | 2.02E-17         |
| 192    | XOPN + NO3 = 0.5 NO2 + 0.5 NTR2 + 0.45 XO2H + 0.45 XO2 + 0.1 XO2N + RO2 + 0.25 OPEN + 0.25 MGLY            | k = 3.00E-12                                  | 3.00E-12         |

| Number | Reactants and Products                                                                            | Rate Constant Expression                                                                       | k <sub>298</sub> |
|--------|---------------------------------------------------------------------------------------------------|------------------------------------------------------------------------------------------------|------------------|
| 193    | OPEN = OPO3 + HO2 + CO                                                                            | Photolysis                                                                                     | 5.04E-4          |
| 194    | OPEN + OH = 0.6 OPO3 + 0.4 XO2H + 0.4 RO2 + 0.4 GLY                                               | k = 4.40E-11                                                                                   | 4.40E-11         |
| 195    | OPEN + O3 = 1.4 GLY + 0.24 MGLY + 0.5 OH + 0.12 C2O3 + 0.08 FORM + 0.02 ALD2 + 1.98 CO + 0.56 HO2 | k = 5.40E-17 exp(-500/T)                                                                       | 1.01E-17         |
| 196    | OPEN + NO3 = OPO3 + HNO3                                                                          | k = 3.80E-12                                                                                   | 3.80E-12         |
| 197    | CAT1 + OH = 0.14 FORM + 0.2 HO2 + 0.5 CRO                                                         | k = 5.00E-11                                                                                   | 5.00E-11         |
| 198    | CAT1 + NO3 = CRO + HNO3                                                                           | k = 1.70E-10                                                                                   | 1.70E-10         |
| 199    | OPO3 + NO = NO2 + 0.5 GLY + 0.5 CO + 0.8 HO2 + 0.2 CXO3                                           | k = 1.00E-11                                                                                   | 1.00E-11         |
| 200    | OPO3 + NO2 = OPAN                                                                                 | k = k(ref)/K<br>k(ref) = k(54)<br>K = 1.00E+0                                                  | 9.40E-12         |
| 201    | OPAN = OPO3 + NO2                                                                                 | k = k(ref)/K<br>k(ref) = k(55)<br>K = 1.00E+0                                                  | 2.98E-4          |
| 202    | OPO3 + HO2 = 0.41 PACD + 0.15 AACD + 0.15 O3 + 0.44 ALDX + 0.44 XO2H + 0.44 RO2 + 0.44 OH         | k = k(ref)/K<br>k(ref) = k(57)<br>K = 1.00E+0                                                  | 1.39E-11         |
| 203    | OPO3 + C2O3 = MEO2 + XO2 + ALDX + 2 RO2                                                           | k = k(ref)/K<br>k(ref) = k(59)<br>K = 1.00E+0                                                  | 1.55E-11         |
| 204    | OPO3 + RO2 = 0.8 XO2H + 0.8 ALDX + 1.8 RO2 + 0.2 AACD                                             | k = k(ref)/K<br>k(ref) = k(58)<br>K = 1.00E+0                                                  | 1.30E-11         |
| 205    | OPAN + OH = 0.5 NO2 + 0.5 GLY + CO + 0.5 NTR2                                                     | k = 3.60E-11                                                                                   | 3.60E-11         |
| 206    | PANX + OH = ALD2 + NO2                                                                            | k = 3.00E-12                                                                                   | 3.00E-12         |
| 207    | NTR2 = HNO3                                                                                       | k = 2.30E-5                                                                                    | 2.30E-5          |
| 208    | ECH4 + OH = MEO2 + RO2                                                                            | k = 1.85E-12 exp(-1690/T)                                                                      | 6.37E-15         |
| 209    | I2 = 2 I                                                                                          | Photolysis                                                                                     | 1.44E-1          |
| 210    | HOI = I + OH                                                                                      | Photolysis                                                                                     | 6.36E-2          |
| 211    | I + O3 = IO                                                                                       | k = 2.10E-11 exp(-830/T)                                                                       | 1.30E-12         |
| 212    | IO = I + O                                                                                        | Photolysis                                                                                     | 1.18E-1          |
| 213    | IO + IO = 0.4 I + 0.4 OIO + 0.6 I2O2                                                              | k = 5.40E-11 exp(180/T)                                                                        | 9.88E-11         |
| 214    | IO + HO2 = HOI                                                                                    | k = 1.40E-11 exp(540/T)                                                                        | 8.57E-11         |
| 215    | IO + NO = I + NO2                                                                                 | k = 7.15E-12 exp(300/T)                                                                        | 1.96E-11         |
| 216    | IO + NO2 = INO3                                                                                   | Falloff: F=0.4; n=1<br>k(0) = 7.70E-31 (T/300) <sup>-5</sup><br>k(inf) = 1.60E-11              | 3.55E-12         |
| 217    | OIO = I                                                                                           | Photolysis                                                                                     | 1.41E-1          |
| 218    | OIO + OH = HIO3                                                                                   | Falloff: F=0.3; n=1<br>k(0) = 1.50E-27 (T/300) <sup>-3.93</sup><br>k(inf) = 5.50E-10 exp(46/T) | 4.72E-10         |
| 219    | OIO + IO = IXOY                                                                                   | k = 1.00E-10                                                                                   | 1.00E-10         |
| 220    | OIO + NO = IO + NO2                                                                               | k = 1.10E-12 exp(542/T)                                                                        | 6.78E-12         |
| 221    | I2O2 = I + OIO                                                                                    | k = 1.00E+1                                                                                    | 1.00E+1          |
| 222    | I2O2 + O3 = IXOY                                                                                  | k = 1.00E-12                                                                                   | 1.00E-12         |
| 223    | INO3 = I + NO3                                                                                    | Photolysis                                                                                     | 1.25E-2          |
| 224    | INO3 + H2O = HOI + HNO3                                                                           | k = 2.50E-22                                                                                   | 2.50E-22         |
| 225    | XPRP = XO2N + RO2                                                                                 | Falloff: F=0.41; n=1<br>k(0) = 2.37E-21<br>k(inf) = 4.30E-1 (T/298) <sup>-8</sup>              | 3.09E-2          |

| Number | Reactants and Products                                                      | Rate Constant Expression                                               | k <sub>298</sub> |
|--------|-----------------------------------------------------------------------------|------------------------------------------------------------------------|------------------|
| 226    | XPRP = 0.732 ACET + 0.268 ALDX + 0.268<br>PAR + XO2H + RO2                  | k = 1.00E+0                                                            | 1.00E+0          |
| 227    | XPAR = XO2N + RO2                                                           | Falloff: F=0.41; n=1<br>k(0) = 4.81E-20<br>k(inf) = 4.30E-1 (T/298)^-8 | 1.49E-1          |
| 228    | XPAR = 0.126 ALDX + 0.874 ROR + 0.126<br>XO2H + 0.874 XO2 + RO2 - 0.126 PAR | k = 1.00E+0                                                            | 1.00E+0          |
| 229    | INTR = HNO3                                                                 | k = 1.40E-4                                                            | 1.40E-4          |
| 230    | SO2 = SULF                                                                  | 0                                                                      | 0                |
| 231    | DMS + OH = SO2 + FORM + MEO2                                                | k = 1.12E-11 exp(-250/T)                                               | 4.84E-12         |
| 232    | DMS + OH + O2 = SULF + MEO2                                                 | k = 1.28E-37 exp(4480/T)                                               | 4.33E-31         |
| 233    | DMS + NO3 = SO2 + FORM + MEO2 + HNO3                                        | k = 1.9E-13 exp(520/T)                                                 | 1.09E-12         |

## CB6r5 Gas-Phase Chemistry

**Table S6. Reactions and rate constant expressions for the CB6r5 mechanism. See Table S2 for species names.  $k_{298}$  is the rate constant at 298 K and 1 atmosphere using units in  $\text{cm}^3 \text{molecule}^{-1} \text{s}^{-1}$ . For photolysis reactions  $k_{298}$  shows the photolysis rate at a solar zenith angle of  $60^\circ$  and height of 600 m MSL/AGL.**

| Number | Reactants and Products                                                  | Rate Constant Expression                                                                                                     | $k_{298}$ |
|--------|-------------------------------------------------------------------------|------------------------------------------------------------------------------------------------------------------------------|-----------|
| 1      | $\text{NO}_2 = \text{NO} + \text{O}$                                    | Photolysis                                                                                                                   | 6.30E-3   |
| 2      | $\text{O} + \text{O}_2 + \text{M} = \text{O}_3 + \text{M}$              | $k = 6.00\text{E-}34 (T/300)^{-2.6}$                                                                                         | 6.11E-34  |
| 3      | $\text{O}_3 + \text{NO} = \text{NO}_2$                                  | $k = 2.07\text{E-}12 \exp(-1400/T)$                                                                                          | 1.89E-14  |
| 4      | $\text{O} + \text{NO} = \text{NO}_2$                                    | Falloff: $F=0.85$ ; $n=0.84$<br>$k(0) = 1.00\text{E-}31 (T/300)^{-1.6}$<br>$k(\text{inf}) = 5.00\text{E-}11 (T/300)^{-0.3}$  | 2.26E-12  |
| 5      | $\text{O} + \text{NO}_2 = \text{NO}$                                    | $k = 5.10\text{E-}12 \exp(198/T)$                                                                                            | 9.91E-12  |
| 6      | $\text{O} + \text{NO}_2 = \text{NO}_3$                                  | Falloff: $F=0.6$ ; $n=1.03$<br>$k(0) = 1.30\text{E-}31 (T/300)^{-1.5}$<br>$k(\text{inf}) = 2.30\text{E-}11 (T/300)^{0.24}$   | 2.09E-12  |
| 7      | $\text{O} + \text{O}_3 =$                                               | $k = 8.00\text{E-}12 \exp(-2060/T)$                                                                                          | 7.96E-15  |
| 8      | $\text{O}_3 = \text{O}$                                                 | Photolysis                                                                                                                   | 3.33E-4   |
| 9      | $\text{O}_3 = \text{O}_1\text{D}$                                       | Photolysis                                                                                                                   | 8.78E-6   |
| 10     | $\text{O}_1\text{D} + \text{M} = \text{O} + \text{M}$                   | $k = 2.23\text{E-}11 \exp(115/T)$                                                                                            | 3.28E-11  |
| 11     | $\text{O}_1\text{D} + \text{H}_2\text{O} = 2 \text{OH}$                 | $k = 2.14\text{E-}10$                                                                                                        | 2.14E-10  |
| 12     | $\text{O}_3 + \text{OH} = \text{HO}_2$                                  | $k = 1.70\text{E-}12 \exp(-940/T)$                                                                                           | 7.25E-14  |
| 13     | $\text{O}_3 + \text{HO}_2 = \text{OH}$                                  | $k = 2.03\text{E-}16 (T/300)^{4.57} \exp(693/T)$                                                                             | 2.01E-15  |
| 14     | $\text{OH} + \text{O} = \text{HO}_2$                                    | $k = 2.40\text{E-}11 \exp(110/T)$                                                                                            | 3.47E-11  |
| 15     | $\text{HO}_2 + \text{O} = \text{OH}$                                    | $k = 3.00\text{E-}11 \exp(200/T)$                                                                                            | 5.87E-11  |
| 16     | $\text{OH} + \text{OH} = \text{O}$                                      | $k = 6.20\text{E-}14 (T/298)^{2.6} \exp(945/T)$                                                                              | 1.48E-12  |
| 17     | $\text{OH} + \text{OH} = \text{H}_2\text{O}_2$                          | Falloff: $F=0.42$ ; $n=1.23$<br>$k(0) = 9.00\text{E-}31 (T/300)^{-3.2}$<br>$k(\text{inf}) = 3.90\text{E-}11 (T/300)^{-0.47}$ | 6.21E-12  |
| 18     | $\text{OH} + \text{HO}_2 =$                                             | $k = 4.80\text{E-}11 \exp(250/T)$                                                                                            | 1.11E-10  |
| 19     | $\text{HO}_2 + \text{HO}_2 = \text{H}_2\text{O}_2$                      | $k = k_1 + k_2 [\text{M}]$<br>$k_1 = 2.20\text{E-}13 \exp(600/T)$<br>$k_2 = 1.90\text{E-}33 \exp(980/T)$                     | 2.90E-12  |
| 20     | $\text{HO}_2 + \text{HO}_2 + \text{H}_2\text{O} = \text{H}_2\text{O}_2$ | $k = k_1 + k_2 [\text{M}]$<br>$k_1 = 3.08\text{E-}34 \exp(2800/T)$<br>$k_2 = 2.66\text{E-}54 \exp(3180/T)$                   | 6.53E-30  |
| 21     | $\text{H}_2\text{O}_2 = 2 \text{OH}$                                    | Photolysis                                                                                                                   | 3.78E-6   |
| 22     | $\text{H}_2\text{O}_2 + \text{OH} = \text{HO}_2$                        | $k = 1.80\text{E-}12$                                                                                                        | 1.80E-12  |
| 23     | $\text{H}_2\text{O}_2 + \text{O} = \text{OH} + \text{HO}_2$             | $k = 1.40\text{E-}12 \exp(-2000/T)$                                                                                          | 1.70E-15  |
| 24     | $\text{NO} + \text{NO} + \text{O}_2 = 2 \text{NO}_2$                    | $k = 4.25\text{E-}39 \exp(664/T)$                                                                                            | 3.95E-38  |
| 25     | $\text{HO}_2 + \text{NO} = \text{OH} + \text{NO}_2$                     | $k = 3.45\text{E-}12 \exp(270/T)$                                                                                            | 8.54E-12  |
| 26     | $\text{NO}_2 + \text{O}_3 = \text{NO}_3$                                | $k = 1.40\text{E-}13 \exp(-2470/T)$                                                                                          | 3.52E-17  |
| 27     | $\text{NO}_3 = \text{NO}_2 + \text{O}$                                  | Photolysis                                                                                                                   | 1.56E-1   |
| 28     | $\text{NO}_3 = \text{NO}$                                               | Photolysis                                                                                                                   | 1.98E-2   |
| 29     | $\text{NO}_3 + \text{NO} = 2 \text{NO}_2$                               | $k = 1.80\text{E-}11 \exp(110/T)$                                                                                            | 2.60E-11  |
| 30     | $\text{NO}_3 + \text{NO}_2 = \text{NO} + \text{NO}_2$                   | $k = 4.50\text{E-}14 \exp(-1260/T)$                                                                                          | 6.56E-16  |
| 31     | $\text{NO}_3 + \text{O} = \text{NO}_2$                                  | $k = 1.70\text{E-}11$                                                                                                        | 1.70E-11  |

| Number | Reactants and Products                                                                                                                              | Rate Constant Expression                                                                                                                                                                                       | k <sub>298</sub> |
|--------|-----------------------------------------------------------------------------------------------------------------------------------------------------|----------------------------------------------------------------------------------------------------------------------------------------------------------------------------------------------------------------|------------------|
| 32     | NO <sub>3</sub> + OH = HO <sub>2</sub> + NO <sub>2</sub>                                                                                            | k = 2.00E-11                                                                                                                                                                                                   | 2.00E-11         |
| 33     | NO <sub>3</sub> + HO <sub>2</sub> = OH + NO <sub>2</sub>                                                                                            | k = 4.00E-12                                                                                                                                                                                                   | 4.00E-12         |
| 34     | NO <sub>3</sub> + O <sub>3</sub> = NO <sub>2</sub>                                                                                                  | k = 1.00E-17                                                                                                                                                                                                   | 1.00E-17         |
| 35     | NO <sub>3</sub> + NO <sub>3</sub> = 2 NO <sub>2</sub>                                                                                               | k = 8.50E-13 exp(-2450/T)                                                                                                                                                                                      | 2.28E-16         |
| 36     | NO <sub>3</sub> + NO <sub>2</sub> = N <sub>2</sub> O <sub>5</sub>                                                                                   | Falloff: F=0.35; n=1.33<br>k(0) = 3.60E-30 (T/300) <sup>-4.1</sup><br>k(inf) = 1.90E-12 (T/300) <sup>0.2</sup>                                                                                                 | 1.24E-12         |
| 37     | N <sub>2</sub> O <sub>5</sub> = NO <sub>3</sub> + NO <sub>2</sub>                                                                                   | Falloff: F=0.35; n=1.33<br>k(0) = 1.30E-3 (T/300) <sup>-3.5</sup> exp(-11000/T)<br>k(inf) = 9.70E+14 (T/300) <sup>0.1</sup> exp(-11080/T)                                                                      | 4.46E-2          |
| 38     | N <sub>2</sub> O <sub>5</sub> = NO <sub>2</sub> + NO <sub>3</sub>                                                                                   | Photolysis                                                                                                                                                                                                     | 2.52E-5          |
| 39     | N <sub>2</sub> O <sub>5</sub> + H <sub>2</sub> O = 2 HNO <sub>3</sub>                                                                               | k = 1.00E-22                                                                                                                                                                                                   | 1.00E-22         |
| 40     | NO + OH = HONO                                                                                                                                      | Falloff: F=0.81; n=0.87<br>k(0) = 7.40E-31 (T/300) <sup>-2.4</sup><br>k(inf) = 3.30E-11 (T/300) <sup>-0.3</sup>                                                                                                | 9.77E-12         |
| 41     | NO + NO <sub>2</sub> + H <sub>2</sub> O = 2 HONO                                                                                                    | k = 5.00E-40                                                                                                                                                                                                   | 5.00E-40         |
| 42     | HONO + HONO = NO + NO <sub>2</sub>                                                                                                                  | k = 1.00E-20                                                                                                                                                                                                   | 1.00E-20         |
| 43     | HONO = NO + OH                                                                                                                                      | Photolysis                                                                                                                                                                                                     | 1.04E-3          |
| 44     | HONO + OH = NO <sub>2</sub>                                                                                                                         | k = 2.50E-12 exp(260/T)                                                                                                                                                                                        | 5.98E-12         |
| 45     | NO <sub>2</sub> + OH = HNO <sub>3</sub>                                                                                                             | Falloff: F=0.41; n=1.24<br>k(0) = 3.20E-30 (T/300) <sup>-4.5</sup><br>k(inf) = 3.00E-11                                                                                                                        | 9.89E-12         |
| 46     | HNO <sub>3</sub> + OH = NO <sub>3</sub>                                                                                                             | k = k <sub>1</sub> + k <sub>3</sub> [M] / (1 + k <sub>3</sub> [M] / k <sub>2</sub> )<br>k <sub>1</sub> = 2.40E-14 exp(460/T)<br>k <sub>2</sub> = 2.70E-17 exp(2199/T)<br>k <sub>3</sub> = 6.50E-34 exp(1335/T) | 1.54E-13         |
| 47     | HNO <sub>3</sub> = OH + NO <sub>2</sub>                                                                                                             | Photolysis                                                                                                                                                                                                     | 2.54E-7          |
| 48     | HO <sub>2</sub> + NO <sub>2</sub> = PNA                                                                                                             | Falloff: F=0.4; n=1.26<br>k(0) = 1.40E-31 (T/300) <sup>-3.1</sup><br>k(inf) = 4.00E-12                                                                                                                         | 7.50E-13         |
| 49     | PNA = HO <sub>2</sub> + NO <sub>2</sub>                                                                                                             | Falloff: F=0.4; n=1.26<br>k(0) = 4.10E-5 exp(-10650/T)<br>k(inf) = 6.00E+15 exp(-11170/T)                                                                                                                      | 6.20E-2          |
| 50     | PNA = 0.59 HO <sub>2</sub> + 0.59 NO <sub>2</sub> + 0.41 OH + 0.41 NO <sub>3</sub>                                                                  | Photolysis                                                                                                                                                                                                     | 2.36E-6          |
| 51     | PNA + OH = NO <sub>2</sub>                                                                                                                          | k = 3.20E-13 exp(690/T)                                                                                                                                                                                        | 3.24E-12         |
| 52     | SO <sub>2</sub> + OH = SULF + HO <sub>2</sub>                                                                                                       | Falloff: F=0.53; n=1.1<br>k(0) = 2.80E-31 (T/300) <sup>-2.6</sup><br>k(inf) = 2.00E-12                                                                                                                         | 9.35E-13         |
| 53     | C <sub>2</sub> O <sub>3</sub> + NO = NO <sub>2</sub> + MEO <sub>2</sub> + RO <sub>2</sub>                                                           | k = 7.50E-12 exp(290/T)                                                                                                                                                                                        | 1.98E-11         |
| 54     | C <sub>2</sub> O <sub>3</sub> + NO <sub>2</sub> = PAN                                                                                               | Falloff: F=0.3; n=1.41<br>k(0) = 3.28E-28 (T/300) <sup>-6.87</sup><br>k(inf) = 1.12E-11 (T/300) <sup>-1.11</sup>                                                                                               | 8.92E-12         |
| 55     | PAN = NO <sub>2</sub> + C <sub>2</sub> O <sub>3</sub>                                                                                               | Falloff: F=0.3; n=1.41<br>k(0) = 1.10E-5 exp(-10100/T)<br>k(inf) = 1.90E+17 exp(-14100/T)                                                                                                                      | 4.31E-4          |
| 56     | PAN = 0.6 NO <sub>2</sub> + 0.6 C <sub>2</sub> O <sub>3</sub> + 0.4 NO <sub>3</sub> + 0.4 MEO <sub>2</sub> + 0.4 RO <sub>2</sub>                    | Photolysis                                                                                                                                                                                                     | 3.47E-7          |
| 57     | C <sub>2</sub> O <sub>3</sub> + HO <sub>2</sub> = 0.37 PACD + 0.13 AACD + 0.13 O <sub>3</sub> + 0.5 OH + 0.5 MEO <sub>2</sub> + 0.5 RO <sub>2</sub> | k = 3.14E-12 exp(580/T)                                                                                                                                                                                        | 2.20E-11         |

| Number | Reactants and Products                                                     | Rate Constant Expression                                          | k <sub>298</sub> |
|--------|----------------------------------------------------------------------------|-------------------------------------------------------------------|------------------|
| 58     | C2O3 + RO2 = MEO2                                                          | $k = 4.40E-13 \exp(1070/T)$                                       | 1.60E-11         |
| 59     | C2O3 + C2O3 = 2 MEO2 + 2 RO2                                               | $k = 2.90E-12 \exp(500/T)$                                        | 1.55E-11         |
| 60     | C2O3 + CXO3 = MEO2 + ALD2 + XO2H + 2 RO2                                   | $k = k(\text{ref})/K$<br>$k(\text{ref}) = k(59)$<br>$K = 1.00E+0$ | 1.55E-11         |
| 61     | CXO3 + NO = NO2 + ALD2 + XO2H + RO2                                        | $k = 6.70E-12 \exp(340/T)$                                        | 2.10E-11         |
| 62     | CXO3 + NO2 = PANX                                                          | $k = k(\text{ref})/K$<br>$k(\text{ref}) = k(54)$<br>$K = 1.21E+0$ | 7.37E-12         |
| 63     | PANX = NO2 + CXO3                                                          | $k = k(\text{ref})/K$<br>$k(\text{ref}) = k(55)$<br>$K = 1.21E+0$ | 3.56E-4          |
| 64     | PANX = 0.6 NO2 + 0.6 CXO3 + 0.4 NO3 + 0.4 ALD2 + 0.4 XO2H + 0.4 RO2        | Photolysis                                                        | 3.47E-7          |
| 65     | CXO3 + HO2 = 0.37 PACD + 0.13 AACD + 0.13 O3 + 0.5 OH + 0.5 MEO2 + 0.5 RO2 | $k = k(\text{ref})/K$<br>$k(\text{ref}) = k(57)$<br>$K = 1.00E+0$ | 2.20E-11         |
| 66     | CXO3 + RO2 = MEO2                                                          | $k = k(\text{ref})/K$<br>$k(\text{ref}) = k(58)$<br>$K = 1.00E+0$ | 1.60E-11         |
| 67     | CXO3 + CXO3 = 2 MEO2 + 2 RO2                                               | $k = k(\text{ref})/K$<br>$k(\text{ref}) = k(59)$<br>$K = 1.00E+0$ | 1.55E-11         |
| 68     | RO2 + NO = NO                                                              | $k = 2.40E-12 \exp(360/T)$                                        | 8.03E-12         |
| 69     | RO2 + HO2 = HO2                                                            | $k = 4.80E-13 \exp(800/T)$                                        | 7.03E-12         |
| 70     | RO2 + RO2 =                                                                | $k = 6.50E-14 \exp(500/T)$                                        | 3.48E-13         |
| 71     | MEO2 + NO = FORM + HO2 + NO2                                               | $k = 2.30E-12 \exp(360/T)$                                        | 7.70E-12         |
| 72     | MEO2 + HO2 = 0.9 MEPX + 0.1 FORM                                           | $k = 3.80E-13 \exp(780/T)$                                        | 5.21E-12         |
| 73     | MEO2 + C2O3 = FORM + 0.9 HO2 + 0.9 MEO2 + 0.1 AACD + 0.9 RO2               | $k = 2.00E-12 \exp(500/T)$                                        | 1.07E-11         |
| 74     | MEO2 + RO2 = 0.685 FORM + 0.315 MEOH + 0.37 HO2 + RO2                      | $k = k(\text{ref})/K$<br>$k(\text{ref}) = k(70)$<br>$K = 1.00E+0$ | 3.48E-13         |
| 75     | XO2H + NO = NO2 + HO2                                                      | $k = 2.70E-12 \exp(360/T)$                                        | 9.04E-12         |
| 76     | XO2H + HO2 = ROOH                                                          | $k = 6.80E-13 \exp(800/T)$                                        | 9.96E-12         |
| 77     | XO2H + C2O3 = 0.8 HO2 + 0.8 MEO2 + 0.2 AACD + 0.8 RO2                      | $k = k(\text{ref})/K$<br>$k(\text{ref}) = k(58)$<br>$K = 1.00E+0$ | 1.60E-11         |
| 78     | XO2H + RO2 = 0.6 HO2 + RO2                                                 | $k = k(\text{ref})/K$<br>$k(\text{ref}) = k(70)$<br>$K = 1.00E+0$ | 3.48E-13         |
| 79     | XO2 + NO = NO2                                                             | $k = k(\text{ref})/K$<br>$k(\text{ref}) = k(75)$<br>$K = 1.00E+0$ | 9.04E-12         |
| 80     | XO2 + HO2 = ROOH                                                           | $k = k(\text{ref})/K$<br>$k(\text{ref}) = k(76)$<br>$K = 1.00E+0$ | 9.96E-12         |
| 81     | XO2 + C2O3 = 0.8 MEO2 + 0.2 AACD + 0.8 RO2                                 | $k = k(\text{ref})/K$<br>$k(\text{ref}) = k(58)$<br>$K = 1.00E+0$ | 1.60E-11         |



| Number | Reactants and Products                                                                       | Rate Constant Expression                       | k <sub>298</sub> |
|--------|----------------------------------------------------------------------------------------------|------------------------------------------------|------------------|
| 82     | XO2 + RO2 = RO2                                                                              | k = k(ref)/K<br>k(ref) = k(70)<br>K = 1.00E+0  | 3.48E-13         |
| 83     | XO2N + NO = 0.5 NTR1 + 0.5 NTR2                                                              | k = k(ref)/K<br>k(ref) = k(75)<br>K = 1.00E+0  | 9.04E-12         |
| 84     | XO2N + HO2 = ROOH                                                                            | k = k(ref)/K<br>k(ref) = k(76)<br>K = 1.00E+0  | 9.96E-12         |
| 85     | XO2N + C2O3 = 0.8 HO2 + 0.8 MEO2 + 0.2 AACD + 0.8 RO2                                        | k = k(ref)/K<br>k(ref) = k(58)<br>K = 1.00E+0  | 1.60E-11         |
| 86     | XO2N + RO2 = RO2                                                                             | k = k(ref)/K<br>k(ref) = k(70)<br>K = 1.00E+0  | 3.48E-13         |
| 87     | MEPX + OH = 0.6 MEO2 + 0.6 RO2 + 0.4 FORM + 0.4 OH                                           | k = 5.30E-12 exp(190/T)                        | 1.00E-11         |
| 88     | MEPX = MEO2 + RO2 + OH                                                                       | Photolysis                                     | 2.68E-6          |
| 89     | ROOH + OH = 0.54 XO2H + 0.06 XO2N + 0.6 RO2 + 0.4 OH                                         | k = 5.30E-12 exp(190/T)                        | 1.00E-11         |
| 90     | ROOH = HO2 + OH                                                                              | Photolysis                                     | 2.68E-6          |
| 91     | NTR1 + OH = NTR2                                                                             | k = 2.00E-12                                   | 2.00E-12         |
| 92     | NTR1 = NO2                                                                                   | Photolysis                                     | 1.06E-6          |
| 93     | FACD + OH = HO2                                                                              | k = 4.50E-13                                   | 4.50E-13         |
| 94     | AACD + OH = MEO2 + RO2                                                                       | k = 4.00E-14 exp(850/T)                        | 6.93E-13         |
| 95     | PACD + OH = C2O3                                                                             | k = 5.30E-12 exp(190/T)                        | 1.00E-11         |
| 96     | FORM + OH = HO2 + CO                                                                         | k = 5.40E-12 exp(135/T)                        | 8.49E-12         |
| 97     | FORM = 2 HO2 + CO                                                                            | Photolysis                                     | 1.69E-5          |
| 98     | FORM = CO + H2                                                                               | Photolysis                                     | 2.69E-5          |
| 99     | FORM + NO3 = HNO3 + HO2 + CO                                                                 | k = 5.50E-16                                   | 5.50E-16         |
| 100    | FORM + HO2 = HCO3                                                                            | k = 9.70E-15 exp(625/T)                        | 7.90E-14         |
| 101    | HCO3 = FORM + HO2                                                                            | k = 2.40E+12 exp(-7000/T)                      | 1.51E+2          |
| 102    | HCO3 + NO = FACD + NO2 + HO2                                                                 | k = 5.60E-12                                   | 5.60E-12         |
| 103    | HCO3 + HO2 = 0.5 MEPX + 0.5 FACD + 0.2 OH + 0.2 HO2                                          | k = 5.60E-15 exp(2300/T)                       | 1.26E-11         |
| 104    | ALD2 + OH = C2O3                                                                             | k = 4.70E-12 exp(345/T)                        | 1.50E-11         |
| 105    | ALD2 + NO3 = C2O3 + HNO3                                                                     | k = 1.40E-12 exp(-1860/T)                      | 2.73E-15         |
| 106    | ALD2 = MEO2 + RO2 + CO + HO2                                                                 | Photolysis                                     | 1.96E-6          |
| 107    | ALDX + OH = CXO3                                                                             | k = 4.90E-12 exp(405/T)                        | 1.91E-11         |
| 108    | ALDX + NO3 = CXO3 + HNO3                                                                     | k = 6.30E-15                                   | 6.30E-15         |
| 109    | ALDX = ALD2 + XO2H + RO2 + CO + HO2                                                          | Photolysis                                     | 2.62E-5          |
| 110    | GLYD + OH = 0.2 GLY + 0.2 HO2 + 0.8 C2O3                                                     | k = 8.00E-12                                   | 8.00E-12         |
| 111    | GLYD = 0.74 FORM + 0.89 CO + 1.4 HO2 + 0.15 MEOH + 0.19 OH + 0.11 GLY + 0.11 XO2H + 0.11 RO2 | Photolysis                                     | 2.76E-6          |
| 112    | GLYD + NO3 = HNO3 + C2O3                                                                     | k = k(ref)/K<br>k(ref) = k(105)<br>K = 1.00E+0 | 2.73E-15         |

| Number | Reactants and Products                                                                                                                                                                                                                                               | Rate Constant Expression                                                                                         | k <sub>298</sub> |
|--------|----------------------------------------------------------------------------------------------------------------------------------------------------------------------------------------------------------------------------------------------------------------------|------------------------------------------------------------------------------------------------------------------|------------------|
| 113    | GLY + OH = 1.8 CO + 0.2 XO <sub>2</sub> + 0.2 RO <sub>2</sub> + HO <sub>2</sub>                                                                                                                                                                                      | k = 3.10E-12 exp(340/T)                                                                                          | 9.70E-12         |
| 114    | GLY = 2 HO <sub>2</sub> + 2 CO                                                                                                                                                                                                                                       | Photolysis                                                                                                       | 5.01E-4          |
| 115    | GLY + NO <sub>3</sub> = HNO <sub>3</sub> + 1.5 CO + 0.5 XO <sub>2</sub> + 0.5 RO <sub>2</sub> + HO <sub>2</sub>                                                                                                                                                      | k = 4.00E-16                                                                                                     | 4.00E-16         |
| 116    | MGLY = C <sub>2</sub> O <sub>3</sub> + HO <sub>2</sub> + CO                                                                                                                                                                                                          | Photolysis                                                                                                       | 1.46E-4          |
| 117    | MGLY + NO <sub>3</sub> = HNO <sub>3</sub> + C <sub>2</sub> O <sub>3</sub> + XO <sub>2</sub> + RO <sub>2</sub>                                                                                                                                                        | k = 5.00E-16                                                                                                     | 5.00E-16         |
| 118    | MGLY + OH = C <sub>2</sub> O <sub>3</sub> + CO                                                                                                                                                                                                                       | k = 1.90E-12 exp(575/T)                                                                                          | 1.31E-11         |
| 119    | H <sub>2</sub> + OH = HO <sub>2</sub>                                                                                                                                                                                                                                | k = 7.70E-12 exp(-2100/T)                                                                                        | 6.70E-15         |
| 120    | CO + OH = HO <sub>2</sub>                                                                                                                                                                                                                                            | k = k <sub>1</sub> + k <sub>2</sub> [M]<br>k <sub>1</sub> = 1.44E-13<br>k <sub>2</sub> = 3.43E-33                | 2.28E-13         |
| 121    | CH <sub>4</sub> + OH = MEO <sub>2</sub> + RO <sub>2</sub>                                                                                                                                                                                                            | k = 1.85E-12 exp(-1690/T)                                                                                        | 6.37E-15         |
| 122    | ETHA + OH = 0.991 ALD <sub>2</sub> + 0.991 XO <sub>2</sub> H + 0.009 XO <sub>2</sub> N + RO <sub>2</sub>                                                                                                                                                             | k = 6.90E-12 exp(-1000/T)                                                                                        | 2.41E-13         |
| 123    | MEOH + OH = FORM + HO <sub>2</sub>                                                                                                                                                                                                                                   | k = 2.85E-12 exp(-345/T)                                                                                         | 8.95E-13         |
| 124    | ETOH + OH = 0.95 ALD <sub>2</sub> + 0.9 HO <sub>2</sub> + 0.1 XO <sub>2</sub> H + 0.1 RO <sub>2</sub> + 0.078 FORM + 0.011 GLYD                                                                                                                                      | k = 3.00E-12 exp(20/T)                                                                                           | 3.21E-12         |
| 125    | KET = 0.5 ALD <sub>2</sub> + 0.5 C <sub>2</sub> O <sub>3</sub> + 0.5 XO <sub>2</sub> H + 0.5 CXO <sub>3</sub> + 0.5 MEO <sub>2</sub> + RO <sub>2</sub> - 2.5 PAR                                                                                                     | Photolysis                                                                                                       | 2.27E-7          |
| 126    | ACET = 0.38 CO + 1.38 MEO <sub>2</sub> + 1.38 RO <sub>2</sub> + 0.62 C <sub>2</sub> O <sub>3</sub>                                                                                                                                                                   | Photolysis                                                                                                       | 2.08E-7          |
| 127    | ACET + OH = FORM + C <sub>2</sub> O <sub>3</sub> + XO <sub>2</sub> + RO <sub>2</sub>                                                                                                                                                                                 | k = 1.41E-12 exp(-620.6/T)                                                                                       | 1.76E-13         |
| 128    | PRPA + OH = XPRP                                                                                                                                                                                                                                                     | k = 7.60E-12 exp(-585/T)                                                                                         | 1.07E-12         |
| 129    | PAR + OH = XPAR                                                                                                                                                                                                                                                      | k = 8.10E-13                                                                                                     | 8.10E-13         |
| 130    | ROR = 0.2 KET + 0.42 ACET + 0.74 ALD <sub>2</sub> + 0.37 ALDX + 0.04 XO <sub>2</sub> N + 0.94 XO <sub>2</sub> H + 0.98 RO <sub>2</sub> + 0.02 ROR - 2.7 PAR                                                                                                          | k = 5.70E+12 exp(-5780/T)                                                                                        | 2.15E+4          |
| 131    | ROR + O <sub>2</sub> = KET + HO <sub>2</sub>                                                                                                                                                                                                                         | k = 1.50E-14 exp(-200/T)                                                                                         | 7.67E-15         |
| 132    | ROR + NO <sub>2</sub> = NTR1                                                                                                                                                                                                                                         | k = 8.60E-12 exp(400/T)                                                                                          | 3.29E-11         |
| 133    | ETHY + OH = 0.7 GLY + 0.7 OH + 0.3 FACD + 0.3 CO + 0.3 HO <sub>2</sub>                                                                                                                                                                                               | Falloff: F=0.37; n=1.3<br>k(0) = 5.00E-30 (T/300) <sup>-1.5</sup><br>k(inf) = 1.00E-12                           | 7.52E-13         |
| 134    | ETH + OH = XO <sub>2</sub> H + RO <sub>2</sub> + 1.56 FORM + 0.22 GLYD                                                                                                                                                                                               | Falloff: F=0.48; n=1.15<br>k(0) = 8.60E-29 (T/300) <sup>-3.1</sup><br>k(inf) = 9.00E-12 (T/300) <sup>-0.85</sup> | 7.84E-12         |
| 135    | ETH + O <sub>3</sub> = FORM + 0.35 CO + 0.27 HO <sub>2</sub> + 0.17 OH + 0.42 FACD                                                                                                                                                                                   | k = 6.82E-15 exp(-2500/T)                                                                                        | 1.55E-18         |
| 136    | ETH + NO <sub>3</sub> = 0.5 NO <sub>2</sub> + 0.5 NTR1 + 0.5 XO <sub>2</sub> H + 0.5 XO <sub>2</sub> + RO <sub>2</sub> + 1.125 FORM                                                                                                                                  | k = 3.30E-12 exp(-2880/T)                                                                                        | 2.10E-16         |
| 137    | OLE + OH = 0.781 FORM + 0.488 ALD <sub>2</sub> + 0.488 ALDX + 0.976 XO <sub>2</sub> H + 0.195 XO <sub>2</sub> + 0.024 XO <sub>2</sub> N + 1.195 RO <sub>2</sub> - 0.73 PAR                                                                                           | Falloff: F=0.5; n=1.13<br>k(0) = 8.00E-27 (T/300) <sup>-3.5</sup><br>k(inf) = 3.00E-11 (T/300) <sup>-1</sup>     | 2.86E-11         |
| 138    | OLE + O <sub>3</sub> = 0.295 ALD <sub>2</sub> + 0.555 FORM + 0.27 ALDX + 0.15 XO <sub>2</sub> H + 0.15 RO <sub>2</sub> + 0.334 OH + 0.08 HO <sub>2</sub> + 0.378 CO + 0.075 GLY + 0.075 MGLY + 0.09 FACD + 0.13 AACD + 0.04 H <sub>2</sub> O <sub>2</sub> - 0.79 PAR | k = 5.50E-15 exp(-1880/T)                                                                                        | 1.00E-17         |

| Number | Reactants and Products                                                                                                                                          | Rate Constant Expression                      | k <sub>298</sub> |
|--------|-----------------------------------------------------------------------------------------------------------------------------------------------------------------|-----------------------------------------------|------------------|
| 139    | OLE + NO3 = 0.5 NO2 + 0.5 NTR1 + 0.48 XO2 + 0.48 XO2H + 0.04 XO2N + RO2 + 0.5 FORM + 0.25 ALD2 + 0.375 ALDX - 1 PAR                                             | k = 4.60E-13 exp(-1155/T)                     | 9.54E-15         |
| 140    | IOLE + OH = 1.3 ALD2 + 0.7 ALDX + XO2H + RO2                                                                                                                    | k = 1.05E-11 exp(519/T)                       | 5.99E-11         |
| 141    | IOLE + O3 = 0.732 ALD2 + 0.442 ALDX + 0.128 FORM + 0.245 CO + 0.5 OH + 0.3 XO2H + 0.3 RO2 + 0.24 GLY + 0.06 MGLY + 0.29 PAR + 0.08 AACD + 0.08 H2O2             | k = 4.70E-15 exp(-1013/T)                     | 1.57E-16         |
| 142    | IOLE + NO3 = 0.5 NO2 + 0.5 NTR1 + 0.48 XO2 + 0.48 XO2H + 0.04 XO2N + RO2 + 0.5 ALD2 + 0.625 ALDX + PAR                                                          | k = 3.70E-13                                  | 3.70E-13         |
| 143    | ISOP + OH = ISO2 + RO2                                                                                                                                          | k = 2.70E-11 exp(390/T)                       | 9.99E-11         |
| 144    | ISO2 + NO = 0.1 INTR + 0.9 NO2 + 0.673 FORM + 0.9 ISPD + 0.818 HO2 + 0.082 XO2H + 0.082 RO2                                                                     | k = 2.39E-12 exp(365/T)                       | 8.13E-12         |
| 145    | ISO2 + HO2 = 0.88 ISPX + 0.12 OH + 0.12 HO2 + 0.12 FORM + 0.12 ISPD                                                                                             | k = 7.43E-13 exp(700/T)                       | 7.78E-12         |
| 146    | ISO2 + C2O3 = 0.598 FORM + 1 ISPD + 0.728 HO2 + 0.072 XO2H + 0.8 MEO2 + 0.2 AACD + 0.872 RO2                                                                    | k = k(ref)/K<br>k(ref) = k(58)<br>K = 1.00E+0 | 1.60E-11         |
| 147    | ISO2 + RO2 = 0.598 FORM + 1 ISPD + 0.728 HO2 + 0.072 XO2H + 1.072 RO2                                                                                           | k = k(ref)/K<br>k(ref) = k(70)<br>K = 1.00E+0 | 3.48E-13         |
| 148    | ISO2 = HO2 + HPLD                                                                                                                                               | k = 3.30E+9 exp(-8300/T)                      | 2.64E-3          |
| 149    | ISOP + O3 = 0.6 FORM + 0.65 ISPD + 0.15 ALDX + 0.2 CXO3 + 0.35 PAR + 0.266 OH + 0.2 XO2 + 0.2 RO2 + 0.066 HO2 + 0.066 CO                                        | k = 1.03E-14 exp(-1995/T)                     | 1.27E-17         |
| 150    | ISOP + NO3 = 0.35 NO2 + 0.65 NTR2 + 0.64 XO2H + 0.33 XO2 + 0.03 XO2N + RO2 + 0.35 FORM + 0.35 ISPD                                                              | k = 3.03E-12 exp(-448/T)                      | 6.74E-13         |
| 151    | ISPD + OH = 0.022 XO2N + 0.521 XO2 + 0.115 MGLY + 0.115 MEO2 + 0.269 GLYD + 0.269 C2O3 + 0.457 OPO3 + 0.117 PAR + 0.137 ACET + 0.137 CO + 0.137 HO2 + 0.658 RO2 | k = 5.58E-12 exp(511/T)                       | 3.10E-11         |
| 152    | ISPD + O3 = 0.04 ALD2 + 0.231 FORM + 0.531 MGLY + 0.17 GLY + 0.17 ACET + 0.543 CO + 0.461 OH + 0.15 FACD + 0.398 HO2 + 0.143 C2O3                               | k = 3.88E-15 exp(-1770/T)                     | 1.02E-17         |
| 153    | ISPD + NO3 = 0.717 HNO3 + 0.142 NTR2 + 0.142 NO2 + 0.142 XO2 + 0.142 XO2H + 0.113 GLYD + 0.113 MGLY + 0.717 PAR + 0.717 CXO3 + 0.284 RO2                        | k = 4.10E-12 exp(-1860/T)                     | 7.98E-15         |
| 154    | ISPD = 0.76 HO2 + 0.34 XO2H + 0.16 XO2 + 0.34 MEO2 + 0.208 C2O3 + 0.26 FORM + 0.24 OLE + 0.24 PAR + 0.17 ACET + 0.128 GLYD + 0.84 RO2                           | Photolysis                                    | 1.60E-5          |
| 155    | ISPX + OH = 0.904 EPOX + 0.933 OH + 0.067 ISO2 + 0.067 RO2 + 0.029 IOLE + 0.029 ALDX                                                                            | k = 2.23E-11 exp(372/T)                       | 7.77E-11         |
| 156    | HPLD = OH + ISPD                                                                                                                                                | Photolysis                                    | 4.41E-4          |
| 157    | HPLD + NO3 = HNO3 + ISPD                                                                                                                                        | k = 6.00E-12 exp(-1860/T)                     | 1.17E-14         |

| Number | Reactants and Products                                                                                                                                             | Rate Constant Expression                      | k <sub>298</sub> |
|--------|--------------------------------------------------------------------------------------------------------------------------------------------------------------------|-----------------------------------------------|------------------|
| 158    | EPOX + OH = EPX2 + RO2                                                                                                                                             | k = 5.78E-11 exp(-400/T)                      | 1.51E-11         |
| 159    | EPX2 + HO2 = 0.275 GLYD + 0.275 GLY + 0.275 MGLY + 1.125 OH + 0.825 HO2 + 0.375 FORM + 0.074 FACD + 0.251 CO + 2.175 PAR                                           | k = 7.43E-13 exp(700/T)                       | 7.78E-12         |
| 160    | EPX2 + NO = 0.275 GLYD + 0.275 GLY + 0.275 MGLY + 0.125 OH + 0.825 HO2 + 0.375 FORM + NO2 + 0.251 CO + 2.175 PAR                                                   | k = 2.39E-12 exp(365/T)                       | 8.13E-12         |
| 161    | EPX2 + C2O3 = 0.22 GLYD + 0.22 GLY + 0.22 MGLY + 0.1 OH + 0.66 HO2 + 0.3 FORM + 0.2 CO + 1.74 PAR + 0.8 MEO2 + 0.2 AACD + 0.8 RO2                                  | k = k(ref)/K<br>k(ref) = k(58)<br>K = 1.00E+0 | 1.60E-11         |
| 162    | EPX2 + RO2 = 0.275 GLYD + 0.275 GLY + 0.275 MGLY + 0.125 OH + 0.825 HO2 + 0.375 FORM + 0.251 CO + 2.175 PAR + RO2                                                  | k = k(ref)/K<br>k(ref) = k(70)<br>K = 1.00E+0 | 3.48E-13         |
| 163    | INTR + OH = 0.63 XO2 + 0.37 XO2H + RO2 + 0.444 NO2 + 0.185 NO3 + 0.104 INTR + 0.592 FORM + 0.331 GLYD + 0.185 FACD + 2.7 PAR + 0.098 OLE + 0.078 ALDX + 0.266 NTR2 | k = 3.10E-11                                  | 3.10E-11         |
| 164    | TERP + OH = 0.75 XO2H + 0.5 XO2 + 0.25 XO2N + 1.5 RO2 + 0.28 FORM + 1.66 PAR + 0.47 ALDX                                                                           | k = 1.50E-11 exp(449/T)                       | 6.77E-11         |
| 165    | TERP + O3 = 0.57 OH + 0.07 XO2H + 0.69 XO2 + 0.18 XO2N + 0.94 RO2 + 0.24 FORM + 0.001 CO + 7 PAR + 0.21 ALDX + 0.39 CXO3                                           | k = 1.20E-15 exp(-821/T)                      | 7.63E-17         |
| 166    | TERP + NO3 = 0.47 NO2 + 0.28 XO2H + 0.75 XO2 + 0.25 XO2N + 1.28 RO2 + 0.47 ALDX + 0.53 NTR2                                                                        | k = 3.70E-12 exp(175/T)                       | 6.66E-12         |
| 167    | BENZ + OH = 0.53 CRES + 0.352 BZO2 + 0.352 RO2 + 0.118 OPEN + 0.118 OH + 0.53 HO2                                                                                  | k = 2.30E-12 exp(-190/T)                      | 1.22E-12         |
| 168    | BZO2 + NO = 0.918 NO2 + 0.082 NTR2 + 0.918 GLY + 0.918 OPEN + 0.918 HO2                                                                                            | k = 2.70E-12 exp(360/T)                       | 9.04E-12         |
| 169    | BZO2 + C2O3 = GLY + OPEN + HO2 + MEO2 + RO2                                                                                                                        | k = k(ref)/K<br>k(ref) = k(58)<br>K = 1.00E+0 | 1.60E-11         |
| 170    | BZO2 + HO2 =                                                                                                                                                       | k = 1.90E-13 exp(1300/T)                      | 1.49E-11         |
| 171    | BZO2 + RO2 = GLY + OPEN + HO2 + RO2                                                                                                                                | k = k(ref)/K<br>k(ref) = k(70)<br>K = 1.00E+0 | 3.48E-13         |
| 172    | TOL + OH = 0.18 CRES + 0.65 TO2 + 0.72 RO2 + 0.1 OPEN + 0.1 OH + 0.07 XO2H + 0.18 HO2                                                                              | k = 1.80E-12 exp(340/T)                       | 5.63E-12         |
| 173    | TO2 + NO = 0.86 NO2 + 0.14 NTR2 + 0.417 GLY + 0.443 MGLY + 0.66 OPEN + 0.2 XOPN + 0.86 HO2                                                                         | k = 2.70E-12 exp(360/T)                       | 9.04E-12         |
| 174    | TO2 + C2O3 = 0.48 GLY + 0.52 MGLY + 0.77 OPEN + 0.23 XOPN + HO2 + MEO2 + RO2                                                                                       | k = k(ref)/K<br>k(ref) = k(58)<br>K = 1.00E+0 | 1.60E-11         |
| 175    | TO2 + HO2 =                                                                                                                                                        | k = 1.90E-13 exp(1300/T)                      | 1.49E-11         |

| Number | Reactants and Products                                                                                     | Rate Constant Expression                      | k <sub>298</sub> |
|--------|------------------------------------------------------------------------------------------------------------|-----------------------------------------------|------------------|
| 176    | TO2 + RO2 = 0.48 GLY + 0.52 MGLY + 0.77 OPEN + 0.23 XOPN + HO2 + RO2                                       | k = k(ref)/K<br>k(ref) = k(70)<br>K = 1.00E+0 | 3.48E-13         |
| 177    | XYL + OH = 0.155 CRES + 0.544 XLO2 + 0.602 RO2 + 0.244 XOPN + 0.244 OH + 0.058 XO2H + 0.155 HO2            | k = 1.85E-11                                  | 1.85E-11         |
| 178    | XLO2 + NO = 0.86 NO2 + 0.14 NTR2 + 0.221 GLY + 0.675 MGLY + 0.3 OPEN + 0.56 XOPN + 0.86 HO2                | k = 2.70E-12 exp(360/T)                       | 9.04E-12         |
| 179    | XLO2 + HO2 =                                                                                               | k = 1.90E-13 exp(1300/T)                      | 1.49E-11         |
| 180    | XLO2 + C2O3 = 0.26 GLY + 0.77 MGLY + 0.35 OPEN + 0.65 XOPN + HO2 + MEO2 + RO2                              | k = k(ref)/K<br>k(ref) = k(58)<br>K = 1.00E+0 | 1.60E-11         |
| 181    | XLO2 + RO2 = 0.26 GLY + 0.77 MGLY + 0.35 OPEN + 0.65 XOPN + HO2 + RO2                                      | k = k(ref)/K<br>k(ref) = k(70)<br>K = 1.00E+0 | 3.48E-13         |
| 182    | CRES + OH = 0.025 GLY + 0.025 OPEN + HO2 + 0.2 CRO + 0.732 CAT1 + 0.02 XO2N + 0.02 RO2                     | k = 1.70E-12 exp(950/T)                       | 4.12E-11         |
| 183    | CRES + NO3 = 0.3 CRO + HNO3 + 0.48 XO2 + 0.12 XO2H + 0.24 GLY + 0.24 MGLY + 0.48 OPO3 + 0.1 XO2N + 0.7 RO2 | k = 1.40E-11                                  | 1.40E-11         |
| 184    | CRO + NO2 = CRON                                                                                           | k = 2.10E-12                                  | 2.10E-12         |
| 185    | CRO + HO2 = CRES                                                                                           | k = 5.50E-12                                  | 5.50E-12         |
| 186    | CRON + OH = NTR2 + 0.5 CRO                                                                                 | k = 1.53E-12                                  | 1.53E-12         |
| 187    | CRON + NO3 = NTR2 + 0.5 CRO + HNO3                                                                         | k = 3.80E-12                                  | 3.80E-12         |
| 188    | CRON = HONO + HO2 + FORM + OPEN                                                                            | Photolysis                                    | 9.45E-5          |
| 189    | XOPN = 0.4 GLY + XO2H + 0.7 HO2 + 0.7 CO + 0.3 C2O3                                                        | Photolysis                                    | 5.04E-4          |
| 190    | XOPN + OH = MGLY + 0.4 GLY + 2 XO2H + 2 RO2                                                                | k = 9.00E-11                                  | 9.00E-11         |
| 191    | XOPN + O3 = 1.2 MGLY + 0.5 OH + 0.6 C2O3 + 0.1 ALD2 + 0.5 CO + 0.3 XO2H + 0.3 RO2                          | k = 1.08E-16 exp(-500/T)                      | 2.02E-17         |
| 192    | XOPN + NO3 = 0.5 NO2 + 0.5 NTR2 + 0.45 XO2H + 0.45 XO2 + 0.1 XO2N + RO2 + 0.25 OPEN + 0.25 MGLY            | k = 3.00E-12                                  | 3.00E-12         |
| 193    | OPEN = OPO3 + HO2 + CO                                                                                     | Photolysis                                    | 5.04E-4          |
| 194    | OPEN + OH = 0.6 OPO3 + 0.4 XO2H + 0.4 RO2 + 0.4 GLY                                                        | k = 4.40E-11                                  | 4.40E-11         |
| 195    | OPEN + O3 = 1.4 GLY + 0.24 MGLY + 0.5 OH + 0.12 C2O3 + 0.08 FORM + 0.02 ALD2 + 1.98 CO + 0.56 HO2          | k = 5.40E-17 exp(-500/T)                      | 1.01E-17         |
| 196    | OPEN + NO3 = OPO3 + HNO3                                                                                   | k = 3.80E-12                                  | 3.80E-12         |
| 197    | CAT1 + OH = 0.14 FORM + 0.2 HO2 + 0.5 CRO                                                                  | k = 5.00E-11                                  | 5.00E-11         |
| 198    | CAT1 + NO3 = CRO + HNO3                                                                                    | k = 1.70E-10                                  | 1.70E-10         |
| 199    | OPO3 + NO = NO2 + 0.5 GLY + 0.5 CO + 0.8 HO2 + 0.2 CXO3                                                    | k = k(ref)/K<br>k(ref) = k(61)<br>K = 1.00E+0 | 2.10E-11         |

| Number | Reactants and Products                                                        | Rate Constant Expression                                                                          | k <sub>298</sub> |
|--------|-------------------------------------------------------------------------------|---------------------------------------------------------------------------------------------------|------------------|
| 200    | OPO3 + NO2 = OPAN                                                             | k = k(ref)/K<br>k(ref) = k(62)<br>K = 1.00E+0                                                     | 7.37E-12         |
| 201    | OPAN = OPO3 + NO2                                                             | k = k(ref)/K<br>k(ref) = k(63)<br>K = 1.00E+0                                                     | 3.56E-4          |
| 202    | OPO3 + HO2 = 0.37 PACD + 0.13 AACD +<br>0.13 O3 + 0.5 OH + 0.5 MEO2 + 0.5 RO2 | k = k(ref)/K<br>k(ref) = k(65)<br>K = 1.00E+0                                                     | 2.20E-11         |
| 203    | OPO3 + C2O3 = MEO2 + XO2 + ALDX + 2<br>RO2                                    | k = k(ref)/K<br>k(ref) = k(59)<br>K = 1.00E+0                                                     | 1.55E-11         |
| 204    | OPO3 + RO2 = 0.8 XO2H + 0.8 ALDX + 1.8<br>RO2 + 0.2 AACD                      | k = k(ref)/K<br>k(ref) = k(58)<br>K = 1.00E+0                                                     | 1.60E-11         |
| 205    | OPAN + OH = 0.5 NO2 + 0.5 GLY + CO + 0.5<br>NTR2                              | k = 3.60E-11                                                                                      | 3.60E-11         |
| 206    | PANX + OH = ALD2 + NO2                                                        | k = 3.00E-12                                                                                      | 3.00E-12         |
| 207    | NTR2 = HNO3                                                                   | k = 2.30E-5                                                                                       | 2.30E-5          |
| 208    | ECH4 + OH = MEO2 + RO2                                                        | k = 1.85E-12 exp(-1690/T)                                                                         | 6.37E-15         |
| 209    | I2 = 2 I                                                                      | Photolysis                                                                                        | 1.44E-1          |
| 210    | HOI = I + OH                                                                  | Photolysis                                                                                        | 6.36E-2          |
| 211    | I + O3 = IO                                                                   | k = 2.10E-11 exp(-830/T)                                                                          | 1.30E-12         |
| 212    | IO = I + O                                                                    | Photolysis                                                                                        | 1.18E-1          |
| 213    | IO + IO = 0.4 I + 0.4 OIO + 0.6 I2O2                                          | k = 5.40E-11 exp(180/T)                                                                           | 9.88E-11         |
| 214    | IO + HO2 = HOI                                                                | k = 1.40E-11 exp(540/T)                                                                           | 8.57E-11         |
| 215    | IO + NO = I + NO2                                                             | k = 7.15E-12 exp(300/T)                                                                           | 1.96E-11         |
| 216    | IO + NO2 = INO3                                                               | Falloff: F=0.4; n=1.26<br>k(0) = 7.70E-31 (T/300) <sup>-5</sup><br>k(inf) = 1.60E-11              | 3.54E-12         |
| 217    | OIO = I                                                                       | Photolysis                                                                                        | 1.41E-1          |
| 218    | OIO + OH = HIO3                                                               | Falloff: F=0.3; n=1.41<br>k(0) = 1.50E-27 (T/300) <sup>-3.93</sup><br>k(inf) = 5.50E-10 exp(46/T) | 3.96E-10         |
| 219    | OIO + IO = IXOY                                                               | k = 1.00E-10                                                                                      | 1.00E-10         |
| 220    | OIO + NO = IO + NO2                                                           | k = 1.10E-12 exp(542/T)                                                                           | 6.78E-12         |
| 221    | I2O2 = I + OIO                                                                | k = 1.00E+1                                                                                       | 1.00E+1          |
| 222    | I2O2 + O3 = IXOY                                                              | k = 1.00E-12                                                                                      | 1.00E-12         |
| 223    | INO3 = I + NO3                                                                | Photolysis                                                                                        | 1.25E-2          |
| 224    | INO3 + H2O = HOI + HNO3                                                       | k = 2.50E-22                                                                                      | 2.50E-22         |
| 225    | XPRP = XO2N + RO2                                                             | Falloff: F=0.41; n=1<br>k(0) = 2.37E-21<br>k(inf) = 4.30E-1 (T/298) <sup>-8</sup>                 | 3.09E-2          |
| 226    | XPRP = 0.732 ACET + 0.268 ALDX + 0.268<br>PAR + XO2H + RO2                    | k = 1.00E+0                                                                                       | 1.00E+0          |
| 227    | XPAR = XO2N + RO2                                                             | Falloff: F=0.41; n=1<br>k(0) = 4.81E-20<br>k(inf) = 4.30E-1 (T/298) <sup>-8</sup>                 | 1.49E-1          |
| 228    | XPAR = 0.126 ALDX + 0.874 ROR + 0.126<br>XO2H + 0.874 XO2 + RO2 - 0.126 PAR   | k = 1.00E+0                                                                                       | 1.00E+0          |
| 229    | INTR = HNO3                                                                   | k = 1.40E-4                                                                                       | 1.40E-4          |

| Number | Reactants and Products                                                               | Rate Constant Expression | k <sub>298</sub> |
|--------|--------------------------------------------------------------------------------------|--------------------------|------------------|
| 230    | SO <sub>2</sub> = SULF                                                               | k = 0.00E+0              | 0.00E+0          |
| 231    | DMS + OH = SO <sub>2</sub> + FORM + MEO <sub>2</sub>                                 | k = 1.12E-11 exp(-250/T) | 4.84E-12         |
| 232    | DMS + OH + O <sub>2</sub> = SULF + MEO <sub>2</sub>                                  | k = 1.28E-37 exp(4480/T) | 4.33E-31         |
| 233    | DMS + NO <sub>3</sub> = SO <sub>2</sub> + FORM + MEO <sub>2</sub> + HNO <sub>3</sub> | k = 1.90E-13 exp(520/T)  | 1.09E-12         |
| 234    | NO <sub>2</sub> + OH + H <sub>2</sub> O = HNO <sub>3</sub> + H <sub>2</sub> O        | k = 1.10E-30             | 1.10E-30         |

## SAPRC07TC Gas-Phase Chemistry

**Table S7. Reactions and rate constants for the SAPRC07TC mechanism. See Table S8 for species names.  $k_{300}$  is the rate constant at 300 K and 1 atmosphere using units in  $\text{cm}^3 \text{molecule}^{-1} \text{s}^{-1}$ . For photolysis reactions  $k_{298}$  shows the photolysis rate at a solar zenith angle of  $60^\circ$  and height of 600 m MSL/AGL.**

| Number | Reactants and Products                                                             | Rate Constant Expression                                                                                                                                                       | $k_{300}$ |
|--------|------------------------------------------------------------------------------------|--------------------------------------------------------------------------------------------------------------------------------------------------------------------------------|-----------|
| 1      | $\text{NO}_2 = \text{NO} + \text{O}_3\text{P}$                                     | Photolysis                                                                                                                                                                     | 6.37E-3   |
| 2      | $\text{O}_3\text{P} + \text{O}_2 + \text{M} = \text{O}_3$                          | $k = 5.68\text{E-}34 (T/300)^{-2.6}$                                                                                                                                           | 5.68E-34  |
| 3      | $\text{O}_3\text{P} + \text{O}_3 =$                                                | $k = 8.00\text{E-}12 \exp(-2060/T)$                                                                                                                                            | 8.34E-15  |
| 4      | $\text{O}_3\text{P} + \text{NO} = \text{NO}_2$                                     | Falloff: $F=0.6; n=1$<br>$k(0) = 9.00\text{E-}32 (T/300)^{-1.5}$<br>$k(\text{inf}) = 3.00\text{E-}11$                                                                          | 1.64E-12  |
| 5      | $\text{O}_3\text{P} + \text{NO}_2 = \text{NO}$                                     | $k = 5.50\text{E-}12 \exp(188/T)$                                                                                                                                              | 1.03E-11  |
| 6      | $\text{O}_3\text{P} + \text{NO}_2 = \text{NO}_3$                                   | Falloff: $F=0.6; n=1$<br>$k(0) = 2.50\text{E-}31 (T/300)^{-1.8}$<br>$k(\text{inf}) = 2.20\text{E-}11 (T/300)^{-0.7}$                                                           | 3.24E-12  |
| 7      | $\text{O}_3 + \text{NO} = \text{NO}_2$                                             | $k = 3.00\text{E-}12 \exp(-1500/T)$                                                                                                                                            | 2.02E-14  |
| 8      | $\text{O}_3 + \text{NO}_2 = \text{NO}_3$                                           | $k = 1.40\text{E-}13 \exp(-2470/T)$                                                                                                                                            | 3.72E-17  |
| 9      | $\text{NO} + \text{NO}_3 = 2. \text{NO}_2$                                         | $k = 1.80\text{E-}11 \exp(110/T)$                                                                                                                                              | 2.60E-11  |
| 10     | $\text{NO} + \text{NO} + \text{O}_2 = 2. \text{NO}_2$                              | $k = 3.30\text{E-}39 \exp(530/T)$                                                                                                                                              | 1.93E-38  |
| 11     | $\text{NO}_2 + \text{NO}_3 = \text{N}_2\text{O}_5$                                 | Falloff: $F=0.35; n=1.33$<br>$k(0) = 3.60\text{E-}30 (T/300)^{-4.1}$<br>$k(\text{inf}) = 1.90\text{E-}12 (T/300)^{0.2}$                                                        | 1.24E-12  |
| 12     | $\text{N}_2\text{O}_5 = \text{NO}_2 + \text{NO}_3$                                 | Falloff: $F=0.35; n=1.33$<br>$k(0) = 1.30\text{E-}3 (T/300)^{-3.5} \exp(-11000/T)$<br>$k(\text{inf}) = 9.70\text{E+}14 (T/300)^{0.1} \exp(-11080/T)$                           | 5.69E-2   |
| 13     | $\text{N}_2\text{O}_5 + \text{H}_2\text{O} = 2. \text{HNO}_3$                      | $k = 1.00\text{E-}22$                                                                                                                                                          | 1.00E-22  |
| 14     | $\text{N}_2\text{O}_5 + \text{H}_2\text{O} + \text{H}_2\text{O} = 2. \text{HNO}_3$ | $k = 0.00\text{E+}0$                                                                                                                                                           | 0.00E+0   |
| 15     | $\text{NO}_2 + \text{NO}_3 = \text{NO} + \text{NO}_2$                              | $k = 4.50\text{E-}14 \exp(-1260/T)$                                                                                                                                            | 6.75E-16  |
| 16     | $\text{NO}_3 = \text{NO}$                                                          | Photolysis                                                                                                                                                                     | 1.98E-2   |
| 17     | $\text{NO}_3 = \text{NO}_2 + \text{O}_3\text{P}$                                   | Photolysis                                                                                                                                                                     | 1.56E-1   |
| 18     | $\text{O}_3 = \text{O}_1\text{D}$                                                  | Photolysis                                                                                                                                                                     | 9.47E-6   |
| 19     | $\text{O}_3 = \text{O}_3\text{P}$                                                  | Photolysis                                                                                                                                                                     | 3.40E-4   |
| 20     | $\text{O}_1\text{D} + \text{H}_2\text{O} = 2. \text{OH}$                           | $k = 1.63\text{E-}10 \exp(60/T)$                                                                                                                                               | 1.99E-10  |
| 21     | $\text{O}_1\text{D} + \text{M} = \text{O}_3\text{P}$                               | $k = 2.38\text{E-}11 \exp(96/T)$                                                                                                                                               | 3.28E-11  |
| 22     | $\text{OH} + \text{NO} = \text{HONO}$                                              | Falloff: $F=0.6; n=1$<br>$k(0) = 7.00\text{E-}31 (T/300)^{-2.6}$<br>$k(\text{inf}) = 3.60\text{E-}11 (T/300)^{-0.1}$                                                           | 7.31E-12  |
| 23     | $\text{HONO} = \text{OH} + \text{NO}$                                              | Photolysis                                                                                                                                                                     | 9.88E-4   |
| 24     | $\text{OH} + \text{HONO} = \text{NO}_2$                                            | $k = 2.50\text{E-}12 \exp(260/T)$                                                                                                                                              | 5.95E-12  |
| 25     | $\text{OH} + \text{NO}_2 = \text{HNO}_3$                                           | Falloff: $F=0.6; n=1$<br>$k(0) = 1.80\text{E-}30 (T/300)^{-3}$<br>$k(\text{inf}) = 2.80\text{E-}11$                                                                            | 1.05E-11  |
| 26     | $\text{OH} + \text{NO}_3 = \text{HO}_2 + \text{NO}_2$                              | $k = 2.00\text{E-}11$                                                                                                                                                          | 2.00E-11  |
| 27     | $\text{OH} + \text{HNO}_3 = \text{NO}_3$                                           | $k = k_1 + k_3 [\text{M}] / (1 + k_3 [\text{M}] / k_2)$<br>$k_1 = 2.40\text{E-}14 \exp(460/T)$<br>$k_2 = 2.70\text{E-}17 \exp(2199/T)$<br>$k_3 = 6.50\text{E-}34 \exp(1335/T)$ | 1.51E-13  |
| 28     | $\text{HNO}_3 = \text{OH} + \text{NO}_2$                                           | Photolysis                                                                                                                                                                     | 2.55E-7   |
| 29     | $\text{OH} + \text{CO} = \text{HO}_2 + \text{CO}_2$                                | $k = k_1 + k_2 [\text{M}]$<br>$k_1 = 1.44\text{E-}13$<br>$k_2 = 3.43\text{E-}33$                                                                                               | 2.28E-13  |
| 30     | $\text{OH} + \text{O}_3 = \text{HO}_2$                                             | $k = 1.70\text{E-}12 \exp(-940/T)$                                                                                                                                             | 7.41E-14  |
| 31     | $\text{HO}_2 + \text{NO} = \text{OH} + \text{NO}_2$                                | $k = 3.60\text{E-}12 \exp(270/T)$                                                                                                                                              | 8.85E-12  |



| Number | Reactants and Products                                  | Rate Constant Expression                                                                                                               | k <sub>300</sub> |
|--------|---------------------------------------------------------|----------------------------------------------------------------------------------------------------------------------------------------|------------------|
| 32     | HO2 + NO2 = PNA                                         | Falloff: F=0.6; n=1<br>k(0) = 2.00E-31 (T/300) <sup>-3.4</sup><br>k(inf) = 2.90E-12 (T/300) <sup>-1.1</sup>                            | 1.12E-12         |
| 33     | PNA = HO2 + NO2                                         | Falloff: F=0.6; n=1<br>k(0) = 3.72E-5 (T/300) <sup>-2.4</sup> exp(-10650/T)<br>k(inf) = 5.42E+15 (T/300) <sup>-2.3</sup> exp(-11170/T) | 1.07E-1          |
| 34     | PNA = 0.61 HO2 + 0.61 NO2 + 0.39 OH + 0.39 NO3          | Photolysis                                                                                                                             | 3.17E-6          |
| 35     | PNA + OH = NO2                                          | k = 1.30E-12 exp(380/T)                                                                                                                | 4.61E-12         |
| 36     | HO2 + O3 = OH                                           | k = 2.03E-16 (T/300) <sup>4.57</sup> exp(693/T)                                                                                        | 2.05E-15         |
| 37     | HO2 + HO2 = H2O2                                        | k = k1 + k2 [M]<br>k1 = 2.20E-13 exp(600/T)<br>k2 = 1.90E-33 exp(980/T)                                                                | 2.84E-12         |
| 38     | HO2 + HO2 + H2O = H2O2                                  | k = k1 + k2 [M]<br>k1 = 3.08E-34 exp(2800/T)<br>k2 = 2.66E-54 exp(3180/T)                                                              | 6.09E-30         |
| 39     | NO3 + HO2 = 0.8 OH + 0.8 NO2 + 0.2 HNO3                 | k = 4.00E-12                                                                                                                           | 4.00E-12         |
| 40     | NO3 + NO3 = 2. NO2                                      | k = 8.50E-13 exp(-2450/T)                                                                                                              | 2.41E-16         |
| 41     | H2O2 = 2. OH                                            | Photolysis                                                                                                                             | 3.78E-6          |
| 42     | H2O2 + OH = HO2                                         | k = 1.80E-12                                                                                                                           | 1.80E-12         |
| 43     | OH + HO2 =                                              | k = 4.80E-11 exp(250/T)                                                                                                                | 1.10E-10         |
| 44     | OH + SO2 = HO2 + SULF                                   | Falloff: F=0.6; n=1<br>k(0) = 3.30E-31 (T/300) <sup>-4.3</sup><br>k(inf) = 1.60E-12                                                    | 9.49E-13         |
| 45     | OH + H2 = HO2                                           | k = 7.70E-12 exp(-2100/T)                                                                                                              | 7.02E-15         |
| 46     | MEO2 + NO = NO2 + HCHO + HO2                            | k = 2.30E-12 exp(360/T)                                                                                                                | 7.64E-12         |
| 47     | MEO2 + HO2 = COOH                                       | k = 3.46E-13 (T/300) <sup>0.36</sup> exp(780/T)                                                                                        | 4.66E-12         |
| 48     | MEO2 + HO2 = HCHO                                       | k = 3.34E-14 (T/300) <sup>-3.53</sup> exp(780/T)                                                                                       | 4.50E-13         |
| 49     | MEO2 + NO3 = HCHO + HO2 + NO2                           | k = 1.30E-12                                                                                                                           | 1.30E-12         |
| 50     | MEO2 + MEO2 = MEOH + HCHO                               | k = 6.39E-14 (T/300) <sup>-1.8</sup> exp(365/T)                                                                                        | 2.16E-13         |
| 51     | MEO2 + MEO2 = 2. HCHO + 2. HO2                          | k = 7.40E-13 exp(-520/T)                                                                                                               | 1.31E-13         |
| 52     | RO2C + NO = NO2                                         | k = 2.60E-12 exp(380/T)                                                                                                                | 9.23E-12         |
| 53     | RO2C + HO2 =                                            | k = 3.80E-13 exp(900/T)                                                                                                                | 7.63E-12         |
| 54     | RO2C + NO3 = NO2                                        | k = 2.30E-12                                                                                                                           | 2.30E-12         |
| 55     | RO2C + MEO2 = 0.5 HO2 + 0.75 HCHO + 0.25 MEOH           | k = 2.00E-13                                                                                                                           | 2.00E-13         |
| 56     | RO2C + RO2C =                                           | k = 3.50E-14                                                                                                                           | 3.50E-14         |
| 57     | RO2X + NO = XN                                          | k = k(52)                                                                                                                              | 9.23E-12         |
| 58     | RO2X + HO2 =                                            | k = k(53)                                                                                                                              | 7.63E-12         |
| 59     | RO2X + NO3 = NO2                                        | k = k(54)                                                                                                                              | 2.30E-12         |
| 60     | RO2X + MEO2 = 0.5 HO2 + 0.75 HCHO + 0.25 MEOH           | k = k(55)                                                                                                                              | 2.00E-13         |
| 61     | RO2X + RO2C =                                           | k = k(56)                                                                                                                              | 3.50E-14         |
| 62     | RO2X + RO2X =                                           | k = k(56)                                                                                                                              | 3.50E-14         |
| 63     | MCO3 + NO2 = PAN                                        | Falloff: F=0.3; n=1.41<br>k(0) = 2.70E-28 (T/300) <sup>-7.1</sup><br>k(inf) = 1.21E-11 (T/300) <sup>-0.9</sup>                         | 9.38E-12         |
| 64     | PAN = MCO3 + NO2                                        | Falloff: F=0.3; n=1.41<br>k(0) = 4.90E-3 exp(-12100/T)<br>k(inf) = 4.00E+16 exp(-13600/T)                                              | 6.27E-4          |
| 65     | PAN = 0.6 MCO3 + 0.6 NO2 + 0.4 MEO2 + 0.4 CO2 + 0.4 NO3 | Photolysis                                                                                                                             | 3.50E-7          |
| 66     | MCO3 + NO = MEO2 + CO2 + NO2                            | k = 7.50E-12 exp(290/T)                                                                                                                | 1.97E-11         |
| 67     | MCO3 + HO2 = 0.7 CO3H + 0.3 AACD + 0.3 O3               | k = 5.20E-13 exp(980/T)                                                                                                                | 1.36E-11         |

| Number | Reactants and Products                                                                    | Rate Constant Expression   | k <sub>300</sub> |
|--------|-------------------------------------------------------------------------------------------|----------------------------|------------------|
| 68     | MCO3 + NO3 = MEO2 + CO2 + NO2                                                             | k = k(54)                  | 2.30E-12         |
| 69     | MCO3 + MEO2 = 0.1 AACD + HCHO + 0.9 HO2 + 0.9 MEO2 + 0.9 CO2                              | k = 2.00E-12 exp(500/T)    | 1.06E-11         |
| 70     | MCO3 + RO2C = MEO2 + CO2                                                                  | k = 4.40E-13 exp(1070/T)   | 1.56E-11         |
| 71     | MCO3 + RO2X = MEO2 + CO2                                                                  | k = k(70)                  | 1.56E-11         |
| 72     | MCO3 + MCO3 = 2. MEO2 + 2. CO2                                                            | k = 2.90E-12 exp(500/T)    | 1.54E-11         |
| 73     | RCO3 + NO2 = PAN2                                                                         | k = 1.21E-11 (T/300)^-1.07 | 1.21E-11         |
| 74     | PAN2 = RCO3 + NO2                                                                         | k = 8.30E+16 exp(-13940/T) | 5.48E-4          |
| 75     | PAN2 = 0.6 RCO3 + 0.6 NO2 + 0.4 RO2C + 0.4 XHO2 + 0.4 YRPX + 0.4 XCCH + 0.4 CO2 + 0.4 NO3 | Photolysis                 | 3.50E-7          |
| 76     | RCO3 + NO = NO2 + RO2C + XHO2 + YRPX + XCCH + CO2                                         | k = 6.70E-12 exp(340/T)    | 2.08E-11         |
| 77     | RCO3 + HO2 = 0.75 RO3H + 0.25 PACD + 0.25 O3                                              | k = k(67)                  | 1.36E-11         |
| 78     | RCO3 + NO3 = NO2 + RO2C + XHO2 + YRPX + XCCH + CO2                                        | k = k(54)                  | 2.30E-12         |
| 79     | RCO3 + MEO2 = HCHO + HO2 + RO2C + XHO2 + XCCH + YRPX + CO2                                | k = k(69)                  | 1.06E-11         |
| 80     | RCO3 + RO2C = RO2C + XHO2 + XCCH + YRPX + CO2                                             | k = k(70)                  | 1.56E-11         |
| 81     | RCO3 + RO2X = RO2C + XHO2 + XCCH + YRPX + CO2                                             | k = k(70)                  | 1.56E-11         |
| 82     | RCO3 + MCO3 = 2. CO2 + MEO2 + RO2C + XHO2 + YRPX + XCCH                                   | k = k(72)                  | 1.54E-11         |
| 83     | RCO3 + RCO3 = 2. RO2C + 2. XHO2 + 2. XCCH + 2. YRPX + 2. CO2                              | k = k(72)                  | 1.54E-11         |
| 84     | BZC3 + NO2 = PBZN                                                                         | k = 1.37E-11               | 1.37E-11         |
| 85     | PBZN = BZC3 + NO2                                                                         | k = 7.90E+16 exp(-14000/T) | 4.27E-4          |
| 86     | PBZN = 0.6 BZC3 + 0.6 NO2 + 0.4 CO2 + 0.4 BZO + 0.4 RO2C + 0.4 NO3                        | Photolysis                 | 3.50E-7          |
| 87     | BZC3 + NO = NO2 + CO2 + BZO + RO2C                                                        | k = k(76)                  | 2.08E-11         |
| 88     | BZC3 + HO2 = 0.75 RO3H + 0.25 PACD + 0.25 O3 + 4. XC                                      | k = k(67)                  | 1.36E-11         |
| 89     | BZC3 + NO3 = NO2 + CO2 + BZO + RO2C                                                       | k = k(54)                  | 2.30E-12         |
| 90     | BZC3 + MEO2 = HCHO + HO2 + RO2C + BZO + CO2                                               | k = k(69)                  | 1.06E-11         |
| 91     | BZC3 + RO2C = RO2C + BZO + CO2                                                            | k = k(70)                  | 1.56E-11         |
| 92     | BZC3 + RO2X = RO2C + BZO + CO2                                                            | k = k(70)                  | 1.56E-11         |
| 93     | BZC3 + MCO3 = 2. CO2 + MEO2 + BZO + RO2C                                                  | k = k(72)                  | 1.54E-11         |
| 94     | BZC3 + RCO3 = 2. CO2 + 2. RO2C + XHO2 + YRPX + XCCH + BZO                                 | k = k(72)                  | 1.54E-11         |
| 95     | BZC3 + BZC3 = 2. BZO + 2. RO2C + 2. CO2                                                   | k = k(72)                  | 1.54E-11         |
| 96     | MAC3 + NO2 = MPAN                                                                         | k = k(73)                  | 1.21E-11         |
| 97     | MPAN = MAC3 + NO2                                                                         | k = 1.60E+16 exp(-13486/T) | 4.80E-4          |
| 98     | MPAN = 0.6 MAC3 + 0.6 NO2 + 0.4 CO2 + 0.4 HCHO + 0.4 MCO3 + 0.4 NO3                       | Photolysis                 | 3.50E-7          |
| 99     | MAC3 + NO = NO2 + CO2 + HCHO + MCO3                                                       | k = k(76)                  | 2.08E-11         |
| 100    | MAC3 + HO2 = 0.75 RO3H + 0.25 PACD + 0.25 O3 + XC                                         | k = k(67)                  | 1.36E-11         |
| 101    | MAC3 + NO3 = NO2 + CO2 + HCHO + MCO3                                                      | k = k(54)                  | 2.30E-12         |
| 102    | MAC3 + MEO2 = 2. HCHO + HO2 + CO2 + MCO3                                                  | k = k(69)                  | 1.06E-11         |
| 103    | MAC3 + RO2C = CO2 + HCHO + MCO3                                                           | k = k(70)                  | 1.56E-11         |

| Number | Reactants and Products                                         | Rate Constant Expression  | k <sub>300</sub> |
|--------|----------------------------------------------------------------|---------------------------|------------------|
| 104    | MAC3 + RO2X = CO2 + HCHO + MCO3                                | k = k(70)                 | 1.56E-11         |
| 105    | MAC3 + MCO3 = 2. CO2 + MEO2 + HCHO + MCO3                      | k = k(72)                 | 1.54E-11         |
| 106    | MAC3 + RCO3 = HCHO + MCO3 + RO2C + XHO2 + YRPX + XCCH + 2. CO2 | k = k(72)                 | 1.54E-11         |
| 107    | MAC3 + BZC3 = HCHO + MCO3 + BZO + RO2C + 2. CO2                | k = k(72)                 | 1.54E-11         |
| 108    | MAC3 + MAC3 = 2. HCHO + 2. MCO3 + 2. CO2                       | k = k(72)                 | 1.54E-11         |
| 109    | TBUO + NO2 = RNO3 - 2. XC                                      | k = 2.40E-11              | 2.40E-11         |
| 110    | TBUO = ACET + MEO2                                             | k = 7.50E+14 exp(-8152/T) | 1.19E+3          |
| 111    | BZO + NO2 = NPHE                                               | k = 2.30E-11 exp(150/T)   | 3.79E-11         |
| 112    | BZO + HO2 = CRES - 1. XC                                       | k = k(53)                 | 7.63E-12         |
| 113    | BZO = CRES + RO2C + XHO2 - 1. XC                               | k = 1.00E-3               | 1.00E-3          |
| 114    | XHO2 + NO = NO + HO2                                           | k = k(52)                 | 9.23E-12         |
| 115    | XHO2 + HO2 = HO2                                               | k = k(53)                 | 7.63E-12         |
| 116    | XHO2 + NO3 = NO3 + HO2                                         | k = k(54)                 | 2.30E-12         |
| 117    | XHO2 + MEO2 = MEO2 + 0.5 HO2                                   | k = k(55)                 | 2.00E-13         |
| 118    | XHO2 + RO2C = RO2C + 0.5 HO2                                   | k = k(56)                 | 3.50E-14         |
| 119    | XHO2 + RO2X = RO2X + 0.5 HO2                                   | k = k(56)                 | 3.50E-14         |
| 120    | XHO2 + MCO3 = MCO3 + HO2                                       | k = k(70)                 | 1.56E-11         |
| 121    | XHO2 + RCO3 = RCO3 + HO2                                       | k = k(70)                 | 1.56E-11         |
| 122    | XHO2 + BZC3 = BZC3 + HO2                                       | k = k(70)                 | 1.56E-11         |
| 123    | XHO2 + MAC3 = MAC3 + HO2                                       | k = k(70)                 | 1.56E-11         |
| 124    | XOH + NO = NO + OH                                             | k = k(52)                 | 9.23E-12         |
| 125    | XOH + HO2 = HO2                                                | k = k(53)                 | 7.63E-12         |
| 126    | XOH + NO3 = NO3 + OH                                           | k = k(54)                 | 2.30E-12         |
| 127    | XOH + MEO2 = MEO2 + 0.5 OH                                     | k = k(55)                 | 2.00E-13         |
| 128    | XOH + RO2C = RO2C + 0.5 OH                                     | k = k(56)                 | 3.50E-14         |
| 129    | XOH + RO2X = RO2X + 0.5 OH                                     | k = k(56)                 | 3.50E-14         |
| 130    | XOH + MCO3 = MCO3 + OH                                         | k = k(70)                 | 1.56E-11         |
| 131    | XOH + RCO3 = RCO3 + OH                                         | k = k(70)                 | 1.56E-11         |
| 132    | XOH + BZC3 = BZC3 + OH                                         | k = k(70)                 | 1.56E-11         |
| 133    | XOH + MAC3 = MAC3 + OH                                         | k = k(70)                 | 1.56E-11         |
| 134    | XNO2 + NO = NO + NO2                                           | k = k(52)                 | 9.23E-12         |
| 135    | XNO2 + HO2 = HO2 + XN                                          | k = k(53)                 | 7.63E-12         |
| 136    | XNO2 + NO3 = NO3 + NO2                                         | k = k(54)                 | 2.30E-12         |
| 137    | XNO2 + MEO2 = MEO2 + 0.5 NO2 + 0.5 XN                          | k = k(55)                 | 2.00E-13         |
| 138    | XNO2 + RO2C = RO2C + 0.5 NO2 + 0.5 XN                          | k = k(56)                 | 3.50E-14         |
| 139    | XNO2 + RO2X = RO2X + 0.5 NO2 + 0.5 XN                          | k = k(56)                 | 3.50E-14         |
| 140    | XNO2 + MCO3 = MCO3 + NO2                                       | k = k(70)                 | 1.56E-11         |
| 141    | XNO2 + RCO3 = RCO3 + NO2                                       | k = k(70)                 | 1.56E-11         |
| 142    | XNO2 + BZC3 = BZC3 + NO2                                       | k = k(70)                 | 1.56E-11         |
| 143    | XNO2 + MAC3 = MAC3 + NO2                                       | k = k(70)                 | 1.56E-11         |
| 144    | XMEO + NO = NO + MEO2                                          | k = k(52)                 | 9.23E-12         |
| 145    | XMEO + HO2 = HO2 + XC                                          | k = k(53)                 | 7.63E-12         |
| 146    | XMEO + NO3 = NO3 + MEO2                                        | k = k(54)                 | 2.30E-12         |
| 147    | XMEO + MEO2 = 1.5 MEO2 + 0.5 XC                                | k = k(55)                 | 2.00E-13         |
| 148    | XMEO + RO2C = RO2C + 0.5 MEO2 + 0.5 XC                         | k = k(56)                 | 3.50E-14         |
| 149    | XMEO + RO2X = RO2X + 0.5 MEO2 + 0.5 XC                         | k = k(56)                 | 3.50E-14         |
| 150    | XMEO + MCO3 = MCO3 + MEO2                                      | k = k(70)                 | 1.56E-11         |
| 151    | XMEO + RCO3 = RCO3 + MEO2                                      | k = k(70)                 | 1.56E-11         |
| 152    | XMEO + BZC3 = BZC3 + MEO2                                      | k = k(70)                 | 1.56E-11         |
| 153    | XMEO + MAC3 = MAC3 + MEO2                                      | k = k(70)                 | 1.56E-11         |

| Number | Reactants and Products                 | Rate Constant Expression | k <sub>300</sub> |
|--------|----------------------------------------|--------------------------|------------------|
| 154    | XMC3 + NO = NO + MCO3                  | k = k(52)                | 9.23E-12         |
| 155    | XMC3 + HO2 = HO2 + 2. XC               | k = k(53)                | 7.63E-12         |
| 156    | XMC3 + NO3 = NO3 + MCO3                | k = k(54)                | 2.30E-12         |
| 157    | XMC3 + MEO2 = MEO2 + 0.5 MCO3 + XC     | k = k(55)                | 2.00E-13         |
| 158    | XMC3 + RO2C = RO2C + 0.5 MCO3 + XC     | k = k(56)                | 3.50E-14         |
| 159    | XMC3 + RO2X = RO2X + 0.5 MCO3 + XC     | k = k(56)                | 3.50E-14         |
| 160    | XMC3 + MCO3 = 2. MCO3                  | k = k(70)                | 1.56E-11         |
| 161    | XMC3 + RCO3 = RCO3 + MCO3              | k = k(70)                | 1.56E-11         |
| 162    | XMC3 + BZC3 = BZC3 + MCO3              | k = k(70)                | 1.56E-11         |
| 163    | XMC3 + MAC3 = MAC3 + MCO3              | k = k(70)                | 1.56E-11         |
| 164    | XRC3 + NO = NO + RCO3                  | k = k(52)                | 9.23E-12         |
| 165    | XRC3 + HO2 = HO2 + 3. XC               | k = k(53)                | 7.63E-12         |
| 166    | XRC3 + NO3 = NO3 + RCO3                | k = k(54)                | 2.30E-12         |
| 167    | XRC3 + MEO2 = MEO2 + 0.5 RCO3 + 1.5 XC | k = k(55)                | 2.00E-13         |
| 168    | XRC3 + RO2C = RO2C + 0.5 RCO3 + 1.5 XC | k = k(56)                | 3.50E-14         |
| 169    | XRC3 + RO2X = RO2X + 0.5 RCO3 + 1.5 XC | k = k(56)                | 3.50E-14         |
| 170    | XRC3 + MCO3 = MCO3 + RCO3              | k = k(70)                | 1.56E-11         |
| 171    | XRC3 + RCO3 = 2. RCO3                  | k = k(70)                | 1.56E-11         |
| 172    | XRC3 + BZC3 = BZC3 + RCO3              | k = k(70)                | 1.56E-11         |
| 173    | XRC3 + MAC3 = MAC3 + RCO3              | k = k(70)                | 1.56E-11         |
| 174    | XMA3 + NO = NO + MAC3                  | k = k(52)                | 9.23E-12         |
| 175    | XMA3 + HO2 = HO2 + 4. XC               | k = k(53)                | 7.63E-12         |
| 176    | XMA3 + NO3 = NO3 + MAC3                | k = k(54)                | 2.30E-12         |
| 177    | XMA3 + MEO2 = MEO2 + 0.5 MAC3 + 2. XC  | k = k(55)                | 2.00E-13         |
| 178    | XMA3 + RO2C = RO2C + 0.5 MAC3 + 2. XC  | k = k(56)                | 3.50E-14         |
| 179    | XMA3 + RO2X = RO2X + 0.5 MAC3 + 2. XC  | k = k(56)                | 3.50E-14         |
| 180    | XMA3 + MCO3 = MCO3 + MAC3              | k = k(70)                | 1.56E-11         |
| 181    | XMA3 + RCO3 = RCO3 + MAC3              | k = k(70)                | 1.56E-11         |
| 182    | XMA3 + BZC3 = BZC3 + MAC3              | k = k(70)                | 1.56E-11         |
| 183    | XMA3 + MAC3 = 2. MAC3                  | k = k(70)                | 1.56E-11         |
| 184    | XTBU + NO = NO + TBUO                  | k = k(52)                | 9.23E-12         |
| 185    | XTBU + HO2 = HO2 + 4. XC               | k = k(53)                | 7.63E-12         |
| 186    | XTBU + NO3 = NO3 + TBUO                | k = k(54)                | 2.30E-12         |
| 187    | XTBU + MEO2 = MEO2 + 0.5 TBUO + 2. XC  | k = k(55)                | 2.00E-13         |
| 188    | XTBU + RO2C = RO2C + 0.5 TBUO + 2. XC  | k = k(56)                | 3.50E-14         |
| 189    | XTBU + RO2X = RO2X + 0.5 TBUO + 2. XC  | k = k(56)                | 3.50E-14         |
| 190    | XTBU + MCO3 = MCO3 + TBUO              | k = k(70)                | 1.56E-11         |
| 191    | XTBU + RCO3 = RCO3 + TBUO              | k = k(70)                | 1.56E-11         |
| 192    | XTBU + BZC3 = BZC3 + TBUO              | k = k(70)                | 1.56E-11         |
| 193    | XTBU + MAC3 = MAC3 + TBUO              | k = k(70)                | 1.56E-11         |
| 194    | XCO + NO = NO + CO                     | k = k(52)                | 9.23E-12         |
| 195    | XCO + HO2 = HO2 + XC                   | k = k(53)                | 7.63E-12         |
| 196    | XCO + NO3 = NO3 + CO                   | k = k(54)                | 2.30E-12         |
| 197    | XCO + MEO2 = MEO2 + 0.5 CO + 0.5 XC    | k = k(55)                | 2.00E-13         |
| 198    | XCO + RO2C = RO2C + 0.5 CO + 0.5 XC    | k = k(56)                | 3.50E-14         |
| 199    | XCO + RO2X = RO2X + 0.5 CO + 0.5 XC    | k = k(56)                | 3.50E-14         |
| 200    | XCO + MCO3 = MCO3 + CO                 | k = k(70)                | 1.56E-11         |
| 201    | XCO + RCO3 = RCO3 + CO                 | k = k(70)                | 1.56E-11         |
| 202    | XCO + BZC3 = BZC3 + CO                 | k = k(70)                | 1.56E-11         |
| 203    | XCO + MAC3 = MAC3 + CO                 | k = k(70)                | 1.56E-11         |
| 204    | HCHO = 2. HO2 + CO                     | Photolysis               | 1.78E-5          |
| 205    | HCHO = CO                              | Photolysis               | 2.38E-5          |
| 206    | HCHO + OH = HO2 + CO                   | k = 5.40E-12 exp(135/T)  | 8.47E-12         |

| Number | Reactants and Products                                                                                                                                                                                                                                                                                                                         | Rate Constant Expression                        | k <sub>300</sub> |
|--------|------------------------------------------------------------------------------------------------------------------------------------------------------------------------------------------------------------------------------------------------------------------------------------------------------------------------------------------------|-------------------------------------------------|------------------|
| 207    | HCHO + NO <sub>3</sub> = HNO <sub>3</sub> + HO <sub>2</sub> + CO                                                                                                                                                                                                                                                                               | k = 2.00E-12 exp(-2431/T)                       | 6.05E-16         |
| 208    | CCHO + OH = MCO <sub>3</sub>                                                                                                                                                                                                                                                                                                                   | k = 4.40E-12 exp(365/T)                         | 1.49E-11         |
| 209    | CCHO = CO + HO <sub>2</sub> + MEO <sub>2</sub>                                                                                                                                                                                                                                                                                                 | Photolysis                                      | 1.77E-6          |
| 210    | CCHO + NO <sub>3</sub> = HNO <sub>3</sub> + MCO <sub>3</sub>                                                                                                                                                                                                                                                                                   | k = 1.40E-12 exp(-1860/T)                       | 2.84E-15         |
| 211    | RCHO + OH = 0.965 RCO <sub>3</sub> + 0.035 RO <sub>2</sub> C + 0.035 XHO <sub>2</sub> + 0.035 XCO + 0.035 XCCH + 0.035 YRPX                                                                                                                                                                                                                    | k = 5.10E-12 exp(405/T)                         | 1.97E-11         |
| 212    | RCHO = RO <sub>2</sub> C + XHO <sub>2</sub> + YRPX + XCCH + CO + HO <sub>2</sub>                                                                                                                                                                                                                                                               | Photolysis                                      | 6.95E-6          |
| 213    | RCHO + NO <sub>3</sub> = HNO <sub>3</sub> + RCO <sub>3</sub>                                                                                                                                                                                                                                                                                   | k = 1.40E-12 exp(-1601/T)                       | 6.74E-15         |
| 214    | ACET + OH = RO <sub>2</sub> C + XMC <sub>3</sub> + XHCH + YRPX                                                                                                                                                                                                                                                                                 | k = 4.56E-14 (T/300) <sup>3.65</sup> exp(429/T) | 1.91E-13         |
| 215    | ACET = 0.62 MCO <sub>3</sub> + 1.38 MEO <sub>2</sub> + 0.38 CO                                                                                                                                                                                                                                                                                 | Photolysis                                      | 1.04E-7          |
| 216    | MEK + OH = 0.967 RO <sub>2</sub> C + 0.039 RO <sub>2</sub> X + 0.039 ZRN <sub>3</sub> + 0.376 XHO <sub>2</sub> + 0.51 XMC <sub>3</sub> + 0.074 XRC <sub>3</sub> + 0.088 XHCH + 0.504 XCCH + 0.376 XRCH + YRPX + 0.3 XC                                                                                                                         | k = 1.30E-12 (T/300) <sup>2</sup> exp(-25/T)    | 1.20E-12         |
| 217    | MEK = MCO <sub>3</sub> + RO <sub>2</sub> C + XHO <sub>2</sub> + XCCH + YRPX                                                                                                                                                                                                                                                                    | Photolysis                                      | 8.13E-7          |
| 218    | MEOH + OH = HCHO + HO <sub>2</sub>                                                                                                                                                                                                                                                                                                             | k = 2.85E-12 exp(-345/T)                        | 9.02E-13         |
| 219    | FACD + OH = HO <sub>2</sub> + CO <sub>2</sub>                                                                                                                                                                                                                                                                                                  | k = 4.50E-13                                    | 4.50E-13         |
| 220    | AACD + OH = 0.509 MEO <sub>2</sub> + 0.491 RO <sub>2</sub> C + 0.509 CO <sub>2</sub> + 0.491 XHO <sub>2</sub> + 0.491 XMGL + 0.491 YRPX - 0.491 XC                                                                                                                                                                                             | k = 4.20E-14 exp(855/T)                         | 7.26E-13         |
| 221    | PACD + OH = RO <sub>2</sub> C + XHO <sub>2</sub> + 0.143 CO <sub>2</sub> + 0.142 XCCH + 0.4 XRCH + 0.457 XBAC + YRPX - 0.455 XC                                                                                                                                                                                                                | k = 1.20E-12                                    | 1.20E-12         |
| 222    | COOH + OH = 0.3 HCHO + 0.3 OH + 0.7 MEO <sub>2</sub>                                                                                                                                                                                                                                                                                           | k = 3.80E-12 exp(200/T)                         | 7.40E-12         |
| 223    | COOH = HCHO + HO <sub>2</sub> + OH                                                                                                                                                                                                                                                                                                             | Photolysis                                      | 2.72E-6          |
| 224    | ROOH + OH = 0.744 OH + 0.251 RO <sub>2</sub> C + 0.004 RO <sub>2</sub> X + 0.004 ZRN <sub>3</sub> + 0.744 RCHO + 0.239 XHO <sub>2</sub> + 0.012 XOH + 0.012 XHCH + 0.012 XCCH + 0.205 XRCH + 0.034 XPD <sub>2</sub> + 0.256 YRPX - 0.115 XC                                                                                                    | k = 2.50E-11                                    | 2.50E-11         |
| 225    | ROOH = RCHO + HO <sub>2</sub> + OH                                                                                                                                                                                                                                                                                                             | Photolysis                                      | 2.72E-6          |
| 226    | R6PX + OH = 0.84 OH + 0.222 RO <sub>2</sub> C + 0.029 RO <sub>2</sub> X + 0.029 ZRN <sub>3</sub> + 0.84 PRD <sub>2</sub> + 0.09 XHO <sub>2</sub> + 0.041 XOH + 0.02 XCCH + 0.075 XRCH + 0.084 XPD <sub>2</sub> + 0.16 YRPX + 0.02 XC                                                                                                           | k = 5.60E-11                                    | 5.60E-11         |
| 227    | R6PX = OH + 0.142 HO <sub>2</sub> + 0.782 RO <sub>2</sub> C + 0.077 RO <sub>2</sub> X + 0.077 ZRN <sub>3</sub> + 0.085 RCHO + 0.142 PRD <sub>2</sub> + 0.782 XHO <sub>2</sub> + 0.026 XCCH + 0.058 XRCH + 0.698 XPD <sub>2</sub> + 0.858 Y6PX + 0.017 XC                                                                                       | Photolysis                                      | 2.72E-6          |
| 228    | RAPX + OH = 0.139 OH + 0.148 HO <sub>2</sub> + 0.589 RO <sub>2</sub> C + 0.124 RO <sub>2</sub> X + 0.124 ZRN <sub>3</sub> + 0.074 PRD <sub>2</sub> + 0.147 MGLY + 0.139 IPRD + 0.565 XHO <sub>2</sub> + 0.024 XOH + 0.448 XRCH + 0.026 XGLY + 0.03 XMEK + 0.252 XMGL + 0.073 XAF <sub>1</sub> + 0.073 XAF <sub>2</sub> + 0.713 Y6PX + 2.674 XC | k = 1.41E-10                                    | 1.41E-10         |
| 229    | RAPX = OH + HO <sub>2</sub> + 0.5 GLY + 0.5 MGLY + 0.5 AFG <sub>1</sub> + 0.5 AFG <sub>2</sub> + 0.5 XC                                                                                                                                                                                                                                        | Photolysis                                      | 2.72E-6          |
| 230    | GLY = 2. CO + 2. HO <sub>2</sub>                                                                                                                                                                                                                                                                                                               | Photolysis                                      | 7.88E-5          |
| 231    | GLY = HCHO + CO                                                                                                                                                                                                                                                                                                                                | Photolysis                                      | 2.23E-5          |
| 232    | GLY + OH = 0.63 HO <sub>2</sub> + 1.26 CO + 0.37 RCO <sub>3</sub> - 0.37 XC                                                                                                                                                                                                                                                                    | k = 1.10E-11                                    | 1.10E-11         |

| Number | Reactants and Products                                                                                                                                                                                                                                                                                                                                                                                                                                  | Rate Constant Expression  | k <sub>300</sub> |
|--------|---------------------------------------------------------------------------------------------------------------------------------------------------------------------------------------------------------------------------------------------------------------------------------------------------------------------------------------------------------------------------------------------------------------------------------------------------------|---------------------------|------------------|
| 233    | GLY + NO <sub>3</sub> = HNO <sub>3</sub> + 0.63 HO <sub>2</sub> + 1.26 CO + 0.37 RCO <sub>3</sub> - 0.37 XC                                                                                                                                                                                                                                                                                                                                             | k = 2.80E-12 exp(-2376/T) | 1.02E-15         |
| 234    | MGLY = HO <sub>2</sub> + CO + MCO <sub>3</sub>                                                                                                                                                                                                                                                                                                                                                                                                          | Photolysis                | 1.39E-4          |
| 235    | MGLY + OH = CO + MCO <sub>3</sub>                                                                                                                                                                                                                                                                                                                                                                                                                       | k = 1.50E-11              | 1.50E-11         |
| 236    | MGLY + NO <sub>3</sub> = HNO <sub>3</sub> + CO + MCO <sub>3</sub>                                                                                                                                                                                                                                                                                                                                                                                       | k = 1.40E-12 exp(-1895/T) | 2.53E-15         |
| 237    | BACL = 2. MCO <sub>3</sub>                                                                                                                                                                                                                                                                                                                                                                                                                              | Photolysis                | 2.45E-4          |
| 238    | CRES + OH = 0.2 BZO + 0.8 RO <sub>2</sub> C + 0.8 XHO <sub>2</sub> + 0.8 Y6PX + 0.25 XMGL + 5.05 XC                                                                                                                                                                                                                                                                                                                                                     | k = 1.70E-12 exp(950/T)   | 4.03E-11         |
| 239    | CRES + NO <sub>3</sub> = HNO <sub>3</sub> + BZO + XC                                                                                                                                                                                                                                                                                                                                                                                                    | k = 1.40E-11              | 1.40E-11         |
| 240    | NPHE + OH = BZO + XN                                                                                                                                                                                                                                                                                                                                                                                                                                    | k = 3.50E-12              | 3.50E-12         |
| 241    | NPHE = HONO + 6. XC                                                                                                                                                                                                                                                                                                                                                                                                                                     | Photolysis                | 9.55E-6          |
| 242    | NPHE = 6. XC + XN                                                                                                                                                                                                                                                                                                                                                                                                                                       | Photolysis                | 9.55E-5          |
| 243    | BALD + OH = BZC <sub>3</sub>                                                                                                                                                                                                                                                                                                                                                                                                                            | k = 1.20E-11              | 1.20E-11         |
| 244    | BALD = 7. XC                                                                                                                                                                                                                                                                                                                                                                                                                                            | Photolysis                | 2.48E-5          |
| 245    | BALD + NO <sub>3</sub> = HNO <sub>3</sub> + BZC <sub>3</sub>                                                                                                                                                                                                                                                                                                                                                                                            | k = 1.34E-12 exp(-1860/T) | 2.72E-15         |
| 246    | AFG1 + OH = 0.217 MAC <sub>3</sub> + 0.723 RO <sub>2</sub> C + 0.06 RO <sub>2</sub> X + 0.06 ZRN <sub>3</sub> + 0.521 XHO <sub>2</sub> + 0.201 XMC <sub>3</sub> + 0.334 XCO + 0.407 XRCH + 0.129 XMEK + 0.107 XGLY + 0.267 XMGL + 0.783 Y6PX + 0.284 XC                                                                                                                                                                                                 | k = 7.40E-11              | 7.40E-11         |
| 247    | AFG1 + O <sub>3</sub> = 0.826 OH + 0.522 HO <sub>2</sub> + 0.652 RO <sub>2</sub> C + 0.522 CO + 0.174 CO <sub>2</sub> + 0.432 GLY + 0.568 MGLY + 0.652 XRC <sub>3</sub> + 0.652 XHCH + 0.652 Y6PX - 0.872 XC                                                                                                                                                                                                                                            | k = 9.66E-18              | 9.66E-18         |
| 248    | AFG1 = 1.023 HO <sub>2</sub> + 0.173 MEO <sub>2</sub> + 0.305 MCO <sub>3</sub> + 0.5 MAC <sub>3</sub> + 0.695 CO + 0.195 GLY + 0.305 MGLY + 0.217 XC                                                                                                                                                                                                                                                                                                    | Photolysis                | 3.07E-3          |
| 249    | AFG2 + OH = 0.217 MAC <sub>3</sub> + 0.723 RO <sub>2</sub> C + 0.06 RO <sub>2</sub> X + 0.06 ZRN <sub>3</sub> + 0.521 XHO <sub>2</sub> + 0.201 XMC <sub>3</sub> + 0.334 XCO + 0.407 XRCH + 0.129 XMEK + 0.107 XGLY + 0.267 XMGL + 0.783 Y6PX + 0.284 XC                                                                                                                                                                                                 | k = 7.40E-11              | 7.40E-11         |
| 250    | AFG2 + O <sub>3</sub> = 0.826 OH + 0.522 HO <sub>2</sub> + 0.652 RO <sub>2</sub> C + 0.522 CO + 0.174 CO <sub>2</sub> + 0.432 GLY + 0.568 MGLY + 0.652 XRC <sub>3</sub> + 0.652 XHCH + 0.652 Y6PX - 0.872 XC                                                                                                                                                                                                                                            | k = 9.66E-18              | 9.66E-18         |
| 251    | AFG2 = PRD <sub>2</sub> - 1. XC                                                                                                                                                                                                                                                                                                                                                                                                                         | Photolysis                | 3.07E-3          |
| 252    | AFG3 + OH = 0.206 MAC <sub>3</sub> + 0.733 RO <sub>2</sub> C + 0.117 RO <sub>2</sub> X + 0.117 ZRN <sub>3</sub> + 0.561 XHO <sub>2</sub> + 0.117 XMC <sub>3</sub> + 0.114 XCO + 0.274 XGLY + 0.153 XMGL + 0.019 XBAC + 0.195 XAF <sub>1</sub> + 0.195 XAF <sub>2</sub> + 0.231 XI <sub>PR</sub> + 0.794 Y6PX + 0.938 XC                                                                                                                                 | k = 9.35E-11              | 9.35E-11         |
| 253    | AFG3 + O <sub>3</sub> = 0.471 OH + 0.554 HO <sub>2</sub> + 0.013 MCO <sub>3</sub> + 0.258 RO <sub>2</sub> C + 0.007 RO <sub>2</sub> X + 0.007 ZRN <sub>3</sub> + 0.58 CO + 0.19 CO <sub>2</sub> + 0.366 GLY + 0.184 MGLY + 0.35 AFG <sub>1</sub> + 0.35 AFG <sub>2</sub> + 0.139 AFG <sub>3</sub> + 0.003 MAC <sub>R</sub> + 0.004 MVK + 0.003 IPRD + 0.095 XHO <sub>2</sub> + 0.163 XRC <sub>3</sub> + 0.163 XHCH + 0.095 XMGL + 0.264 Y6PX - 0.575 XC | k = 1.43E-17              | 1.43E-17         |
| 254    | MAC <sub>R</sub> + OH = 0.5 MAC <sub>3</sub> + 0.5 RO <sub>2</sub> C + 0.5 XHO <sub>2</sub> + 0.416 XCO + 0.084 XHCH + 0.416 XMEK + 0.084 XMGL + 0.5 YRPX - 0.416 XC                                                                                                                                                                                                                                                                                    | k = 8.00E-12 exp(380/T)   | 2.84E-11         |

| Number | Reactants and Products                                                                                                                                                                                                                           | Rate Constant Expression  | k <sub>300</sub> |
|--------|--------------------------------------------------------------------------------------------------------------------------------------------------------------------------------------------------------------------------------------------------|---------------------------|------------------|
| 255    | MACR + O3 = 0.208 OH + 0.108 HO2 + 0.1 RO2C + 0.45 CO + 0.117 CO2 + 0.1 HCHO + 0.9 MGLY + 0.333 FACD + 0.1 XRC3 + 0.1 XHCH + 0.1 YRPX - 0.1 XC                                                                                                   | k = 1.40E-15 exp(-2100/T) | 1.28E-18         |
| 256    | MACR + NO3 = 0.5 MAC3 + 0.5 RO2C + 0.5 HNO3 + 0.5 XHO2 + 0.5 XCO + 0.5 YRPX + 1.5 XC + 0.5 XN                                                                                                                                                    | k = 1.50E-12 exp(-1815/T) | 3.54E-15         |
| 257    | MACR + O3P = RCHO + XC                                                                                                                                                                                                                           | k = 6.34E-12              | 6.34E-12         |
| 258    | MACR = 0.33 OH + 0.67 HO2 + 0.34 MCO3 + 0.33 MAC3 + 0.33 RO2C + 0.67 CO + 0.34 HCHO + 0.33 XMC3 + 0.33 XHCH + 0.33 YRPX                                                                                                                          | Photolysis                | 1.39E-6          |
| 259    | MVK + OH = 0.975 RO2C + 0.025 RO2X + 0.025 ZRN3 + 0.3 XHO2 + 0.675 XMC3 + 0.3 XHCH + 0.675 XGLD + 0.3 XMGL + YRPX - 0.05 XC                                                                                                                      | k = 2.60E-12 exp(610/T)   | 1.99E-11         |
| 260    | MVK + O3 = 0.164 OH + 0.064 HO2 + 0.05 RO2C + 0.05 XHO2 + 0.475 CO + 0.124 CO2 + 0.05 HCHO + 0.95 MGLY + 0.351 FACD + 0.05 XRC3 + 0.05 XHCH + 0.05 YRPX - 0.05 XC                                                                                | k = 8.50E-16 exp(-1520/T) | 5.36E-18         |
| 261    | MVK + O3P = 0.45 RCHO + 0.55 MEK + 0.45 XC                                                                                                                                                                                                       | k = 4.32E-12              | 4.32E-12         |
| 262    | MVK = 0.4 MEO2 + 0.6 CO + 0.6 PRD2 + 0.4 MAC3 - 2.2 XC                                                                                                                                                                                           | Photolysis                | 5.25E-7          |
| 263    | IPRD + OH = 0.289 MAC3 + 0.67 RO2C + 0.67 XHO2 + 0.041 RO2X + 0.041 ZRN3 + 0.336 XCO + 0.055 XHCH + 0.129 XGLD + 0.013 XRCH + 0.15 XMEK + 0.332 XPD2 + 0.15 XGLY + 0.174 XMGL - 0.504 XC + 0.711 Y6PX                                            | k = 6.19E-11              | 6.19E-11         |
| 264    | IPRD + O3 = 0.285 OH + 0.4 HO2 + 0.048 RO2C + 0.048 XRC3 + 0.498 CO + 0.14 CO2 + 0.124 HCHO + 0.21 MEK + 0.023 GLY + 0.742 MGLY + 0.1 FACD + 0.372 PACD + 0.047 XGLD + 0.001 XHCH + 0.048 Y6PX - 0.329 XC                                        | k = 4.18E-18              | 4.18E-18         |
| 265    | IPRD + NO3 = 0.15 MAC3 + 0.15 HNO3 + 0.799 RO2C + 0.799 XHO2 + 0.051 RO2X + 0.051 ZRN3 + 0.572 XCO + 0.227 XHCH + 0.218 XRCH + 0.008 XMGL + 0.572 XRN3 + 0.85 Y6PX + 0.278 XN - 0.815 XC                                                         | k = 1.00E-13              | 1.00E-13         |
| 266    | IPRD = 1.233 HO2 + 0.467 MCO3 + 0.3 RCO3 + 1.233 CO + 0.3 HCHO + 0.467 GLYD + 0.233 MEK - 0.233 XC                                                                                                                                               | Photolysis                | 1.39E-6          |
| 267    | PRD2 + OH = 0.472 HO2 + 0.379 XHO2 + 0.029 XMC3 + 0.049 XRC3 + 0.473 RO2C + 0.071 RO2X + 0.071 ZRN3 + 0.002 HCHO + 0.211 XHCH + 0.001 CCHO + 0.083 XCCH + 0.143 RCHO + 0.402 XRCH + 0.115 XMEK + 0.329 PRD2 + 0.007 XPD2 + 0.528 Y6PX + 0.877 XC | k = 1.55E-11              | 1.55E-11         |
| 268    | PRD2 = 0.913 XHO2 + 0.4 MCO3 + 0.6 RCO3 + 1.59 RO2C + 0.087 RO2X + 0.087 ZRN3 + 0.303 XHCH + 0.163 XCCH + 0.78 XRCH + Y6PX - 0.091 XC                                                                                                            | Photolysis                | 2.26E-8          |

| Number | Reactants and Products                                                                                                                                                                                                                                                                        | Rate Constant Expression  | k <sub>300</sub> |
|--------|-----------------------------------------------------------------------------------------------------------------------------------------------------------------------------------------------------------------------------------------------------------------------------------------------|---------------------------|------------------|
| 269    | RNO3 + OH = 0.189 HO2 + 0.305 XHO2 + 0.019 NO2 + 0.313 XNO2 + 0.976 RO2C + 0.175 RO2X + 0.175 ZRN3 + 0.011 XHCH + 0.429 XCCH + 0.001 RCHO + 0.036 XRCH + 0.004 XACE + 0.01 MEK + 0.17 XMEK + 0.008 PRD2 + 0.031 XPD2 + 0.189 RNO3 + 0.305 XRN3 + 0.157 YRPX + 0.636 Y6PX + 0.174 XN + 0.04 XC | k = 7.20E-12              | 7.20E-12         |
| 270    | RNO3 = 0.344 HO2 + 0.554 XHO2 + NO2 + 0.721 RO2C + 0.102 RO2X + 0.102 ZRN3 + 0.074 HCHO + 0.061 XHCH + 0.214 CCHO + 0.23 XCCH + 0.074 RCHO + 0.063 XRCH + 0.008 XACE + 0.124 MEK + 0.083 XMEK + 0.19 PRD2 + 0.261 XPD2 + 0.066 YRPX + 0.591 Y6PX + 0.396 XC                                   | Photolysis                | 1.20E-6          |
| 271    | GLYD + OH = MCO3                                                                                                                                                                                                                                                                              | k = k(208)                | 1.49E-11         |
| 272    | GLYD = CO + 2. HO2 + HCHO                                                                                                                                                                                                                                                                     | Photolysis                | 2.75E-6          |
| 273    | GLYD + NO3 = HNO3 + MCO3                                                                                                                                                                                                                                                                      | k = k(210)                | 2.84E-15         |
| 274    | ACRO + OH = 0.25 XHO2 + 0.75 MAC3 + 0.25 RO2C + 0.167 XCO + 0.083 XHCH + 0.167 XCCH + 0.083 XGLY + 0.25 YRPX - 0.75 XC                                                                                                                                                                        | k = 1.99E-11              | 1.99E-11         |
| 275    | ACRO + O3 = 0.83 HO2 + 0.33 OH + 1.005 CO + 0.31 CO2 + 0.5 HCHO + 0.185 FACD + 0.5 GLY                                                                                                                                                                                                        | k = 1.40E-15 exp(-2528/T) | 3.07E-19         |
| 276    | ACRO + NO3 = 0.031 XHO2 + 0.967 MAC3 + 0.031 RO2C + 0.002 RO2X + 0.002 ZRN3 + 0.967 HNO3 + 0.031 XCO + 0.031 XRN3 + 0.033 YRPX + 0.002 XN - 1.097 XC                                                                                                                                          | k = 1.18E-15              | 1.18E-15         |
| 277    | ACRO + O3P = RCHO                                                                                                                                                                                                                                                                             | k = 2.37E-12              | 2.37E-12         |
| 278    | ACRO = 1.066 HO2 + 0.178 OH + 0.234 MEO2 + 0.33 MAC3 + 1.188 CO + 0.102 CO2 + 0.34 HCHO + 0.05 AACD - 0.284 XC                                                                                                                                                                                | Photolysis                | 1.28E-6          |
| 279    | CO3H + OH = 0.98 MCO3 + 0.02 RO2C + 0.02 CO2 + 0.02 XOH + 0.02 XHCH + 0.02 YRPX                                                                                                                                                                                                               | k = 5.28E-12              | 5.28E-12         |
| 280    | CO3H = MEO2 + CO2 + OH                                                                                                                                                                                                                                                                        | Photolysis                | 3.60E-7          |
| 281    | RO3H + OH = 0.806 RCO3 + 0.194 RO2C + 0.194 YRPX + 0.11 CO2 + 0.11 XOH + 0.11 XCCH + 0.084 XHO2 + 0.084 XRCH                                                                                                                                                                                  | k = 6.42E-12              | 6.42E-12         |
| 282    | RO3H = XHO2 + XCCH + YRPX + CO2 + OH                                                                                                                                                                                                                                                          | Photolysis                | 3.60E-7          |
| 283    | XHCH + NO = NO + HCHO                                                                                                                                                                                                                                                                         | k = k(52)                 | 9.23E-12         |
| 284    | XHCH + HO2 = HO2 + XC                                                                                                                                                                                                                                                                         | k = k(53)                 | 7.63E-12         |
| 285    | XHCH + NO3 = NO3 + HCHO                                                                                                                                                                                                                                                                       | k = k(54)                 | 2.30E-12         |
| 286    | XHCH + MEO2 = MEO2 + 0.5 HCHO + 0.5 XC                                                                                                                                                                                                                                                        | k = k(55)                 | 2.00E-13         |
| 287    | XHCH + RO2C = RO2C + 0.5 HCHO + 0.5 XC                                                                                                                                                                                                                                                        | k = k(56)                 | 3.50E-14         |
| 288    | XHCH + RO2X = RO2X + 0.5 HCHO + 0.5 XC                                                                                                                                                                                                                                                        | k = k(56)                 | 3.50E-14         |
| 289    | XHCH + MCO3 = MCO3 + HCHO                                                                                                                                                                                                                                                                     | k = k(70)                 | 1.56E-11         |
| 290    | XHCH + RCO3 = RCO3 + HCHO                                                                                                                                                                                                                                                                     | k = k(70)                 | 1.56E-11         |
| 291    | XHCH + BZC3 = BZC3 + HCHO                                                                                                                                                                                                                                                                     | k = k(70)                 | 1.56E-11         |
| 292    | XHCH + MAC3 = MAC3 + HCHO                                                                                                                                                                                                                                                                     | k = k(70)                 | 1.56E-11         |
| 293    | XCCH + NO = NO + CCHO                                                                                                                                                                                                                                                                         | k = k(52)                 | 9.23E-12         |
| 294    | XCCH + HO2 = HO2 + 2. XC                                                                                                                                                                                                                                                                      | k = k(53)                 | 7.63E-12         |
| 295    | XCCH + NO3 = NO3 + CCHO                                                                                                                                                                                                                                                                       | k = k(54)                 | 2.30E-12         |
| 296    | XCCH + MEO2 = MEO2 + 0.5 CCHO + XC                                                                                                                                                                                                                                                            | k = k(55)                 | 2.00E-13         |
| 297    | XCCH + RO2C = RO2C + 0.5 CCHO + XC                                                                                                                                                                                                                                                            | k = k(56)                 | 3.50E-14         |
| 298    | XCCH + RO2X = RO2X + 0.5 CCHO + XC                                                                                                                                                                                                                                                            | k = k(56)                 | 3.50E-14         |
| 299    | XCCH + MCO3 = MCO3 + CCHO                                                                                                                                                                                                                                                                     | k = k(70)                 | 1.56E-11         |



| Number | Reactants and Products                 | Rate Constant Expression | k <sub>300</sub> |
|--------|----------------------------------------|--------------------------|------------------|
| 300    | XCCH + RCO3 = RCO3 + CCHO              | k = k(70)                | 1.56E-11         |
| 301    | XCCH + BZC3 = BZC3 + CCHO              | k = k(70)                | 1.56E-11         |
| 302    | XCCH + MAC3 = MAC3 + CCHO              | k = k(70)                | 1.56E-11         |
| 303    | XRCH + NO = NO + RCHO                  | k = k(52)                | 9.23E-12         |
| 304    | XRCH + HO2 = HO2 + 3. XC               | k = k(53)                | 7.63E-12         |
| 305    | XRCH + NO3 = NO3 + RCHO                | k = k(54)                | 2.30E-12         |
| 306    | XRCH + MEO2 = MEO2 + 0.5 RCHO + 1.5 XC | k = k(55)                | 2.00E-13         |
| 307    | XRCH + RO2C = RO2C + 0.5 RCHO + 1.5 XC | k = k(56)                | 3.50E-14         |
| 308    | XRCH + RO2X = RO2X + 0.5 RCHO + 1.5 XC | k = k(56)                | 3.50E-14         |
| 309    | XRCH + MCO3 = MCO3 + RCHO              | k = k(70)                | 1.56E-11         |
| 310    | XRCH + RCO3 = RCO3 + RCHO              | k = k(70)                | 1.56E-11         |
| 311    | XRCH + BZC3 = BZC3 + RCHO              | k = k(70)                | 1.56E-11         |
| 312    | XRCH + MAC3 = MAC3 + RCHO              | k = k(70)                | 1.56E-11         |
| 313    | XACE + NO = NO + ACET                  | k = k(52)                | 9.23E-12         |
| 314    | XACE + HO2 = HO2 + 3. XC               | k = k(53)                | 7.63E-12         |
| 315    | XACE + NO3 = NO3 + ACET                | k = k(54)                | 2.30E-12         |
| 316    | XACE + MEO2 = MEO2 + 0.5 ACET + 1.5 XC | k = k(55)                | 2.00E-13         |
| 317    | XACE + RO2C = RO2C + 0.5 ACET + 1.5 XC | k = k(56)                | 3.50E-14         |
| 318    | XACE + RO2X = RO2X + 0.5 ACET + 1.5 XC | k = k(56)                | 3.50E-14         |
| 319    | XACE + MCO3 = MCO3 + ACET              | k = k(70)                | 1.56E-11         |
| 320    | XACE + RCO3 = RCO3 + ACET              | k = k(70)                | 1.56E-11         |
| 321    | XACE + BZC3 = BZC3 + ACET              | k = k(70)                | 1.56E-11         |
| 322    | XACE + MAC3 = MAC3 + ACET              | k = k(70)                | 1.56E-11         |
| 323    | XMEK + NO = NO + MEK                   | k = k(52)                | 9.23E-12         |
| 324    | XMEK + HO2 = HO2 + 4. XC               | k = k(53)                | 7.63E-12         |
| 325    | XMEK + NO3 = NO3 + MEK                 | k = k(54)                | 2.30E-12         |
| 326    | XMEK + MEO2 = MEO2 + 0.5 MEK + 2. XC   | k = k(55)                | 2.00E-13         |
| 327    | XMEK + RO2C = RO2C + 0.5 MEK + 2. XC   | k = k(56)                | 3.50E-14         |
| 328    | XMEK + RO2X = RO2X + 0.5 MEK + 2. XC   | k = k(56)                | 3.50E-14         |
| 329    | XMEK + MCO3 = MCO3 + MEK               | k = k(70)                | 1.56E-11         |
| 330    | XMEK + RCO3 = RCO3 + MEK               | k = k(70)                | 1.56E-11         |
| 331    | XMEK + BZC3 = BZC3 + MEK               | k = k(70)                | 1.56E-11         |
| 332    | XMEK + MAC3 = MAC3 + MEK               | k = k(70)                | 1.56E-11         |
| 333    | XPD2 + NO = NO + PRD2                  | k = k(52)                | 9.23E-12         |
| 334    | XPD2 + HO2 = HO2 + 6. XC               | k = k(53)                | 7.63E-12         |
| 335    | XPD2 + NO3 = NO3 + PRD2                | k = k(54)                | 2.30E-12         |
| 336    | XPD2 + MEO2 = MEO2 + 0.5 PRD2 + 3. XC  | k = k(55)                | 2.00E-13         |
| 337    | XPD2 + RO2C = RO2C + 0.5 PRD2 + 3. XC  | k = k(56)                | 3.50E-14         |
| 338    | XPD2 + RO2X = RO2X + 0.5 PRD2 + 3. XC  | k = k(56)                | 3.50E-14         |
| 339    | XPD2 + MCO3 = MCO3 + PRD2              | k = k(70)                | 1.56E-11         |
| 340    | XPD2 + RCO3 = RCO3 + PRD2              | k = k(70)                | 1.56E-11         |
| 341    | XPD2 + BZC3 = BZC3 + PRD2              | k = k(70)                | 1.56E-11         |
| 342    | XPD2 + MAC3 = MAC3 + PRD2              | k = k(70)                | 1.56E-11         |
| 343    | XGLY + NO = NO + GLY                   | k = k(52)                | 9.23E-12         |
| 344    | XGLY + HO2 = HO2 + 2. XC               | k = k(53)                | 7.63E-12         |
| 345    | XGLY + NO3 = NO3 + GLY                 | k = k(54)                | 2.30E-12         |
| 346    | XGLY + MEO2 = MEO2 + 0.5 GLY + XC      | k = k(55)                | 2.00E-13         |
| 347    | XGLY + RO2C = RO2C + 0.5 GLY + XC      | k = k(56)                | 3.50E-14         |
| 348    | XGLY + RO2X = RO2X + 0.5 GLY + XC      | k = k(56)                | 3.50E-14         |
| 349    | XGLY + MCO3 = MCO3 + GLY               | k = k(70)                | 1.56E-11         |
| 350    | XGLY + RCO3 = RCO3 + GLY               | k = k(70)                | 1.56E-11         |
| 351    | XGLY + BZC3 = BZC3 + GLY               | k = k(70)                | 1.56E-11         |
| 352    | XGLY + MAC3 = MAC3 + GLY               | k = k(70)                | 1.56E-11         |

| Number | Reactants and Products                 | Rate Constant Expression | k <sub>300</sub> |
|--------|----------------------------------------|--------------------------|------------------|
| 353    | XMGL + NO = NO + MGLY                  | k = k(52)                | 9.23E-12         |
| 354    | XMGL + HO2 = HO2 + 3. XC               | k = k(53)                | 7.63E-12         |
| 355    | XMGL + NO3 = NO3 + MGLY                | k = k(54)                | 2.30E-12         |
| 356    | XMGL + MEO2 = MEO2 + 0.5 MGLY + 1.5 XC | k = k(55)                | 2.00E-13         |
| 357    | XMGL + RO2C = RO2C + 0.5 MGLY + 1.5 XC | k = k(56)                | 3.50E-14         |
| 358    | XMGL + RO2X = RO2X + 0.5 MGLY + 1.5 XC | k = k(56)                | 3.50E-14         |
| 359    | XMGL + MCO3 = MCO3 + MGLY              | k = k(70)                | 1.56E-11         |
| 360    | XMGL + RCO3 = RCO3 + MGLY              | k = k(70)                | 1.56E-11         |
| 361    | XMGL + BZC3 = BZC3 + MGLY              | k = k(70)                | 1.56E-11         |
| 362    | XMGL + MAC3 = MAC3 + MGLY              | k = k(70)                | 1.56E-11         |
| 363    | XBAC + NO = NO + BA CL                 | k = k(52)                | 9.23E-12         |
| 364    | XBAC + HO2 = HO2 + 4. XC               | k = k(53)                | 7.63E-12         |
| 365    | XBAC + NO3 = NO3 + BA CL               | k = k(54)                | 2.30E-12         |
| 366    | XBAC + MEO2 = MEO2 + 0.5 BA CL + 2. XC | k = k(55)                | 2.00E-13         |
| 367    | XBAC + RO2C = RO2C + 0.5 BA CL + 2. XC | k = k(56)                | 3.50E-14         |
| 368    | XBAC + RO2X = RO2X + 0.5 BA CL + 2. XC | k = k(56)                | 3.50E-14         |
| 369    | XBAC + MCO3 = MCO3 + BA CL             | k = k(70)                | 1.56E-11         |
| 370    | XBAC + RCO3 = RCO3 + BA CL             | k = k(70)                | 1.56E-11         |
| 371    | XBAC + BZC3 = BZC3 + BA CL             | k = k(70)                | 1.56E-11         |
| 372    | XBAC + MAC3 = MAC3 + BA CL             | k = k(70)                | 1.56E-11         |
| 373    | XBAL + NO = NO + BALD                  | k = k(52)                | 9.23E-12         |
| 374    | XBAL + HO2 = HO2 + 7. XC               | k = k(53)                | 7.63E-12         |
| 375    | XBAL + NO3 = NO3 + BALD                | k = k(54)                | 2.30E-12         |
| 376    | XBAL + MEO2 = MEO2 + 0.5 BALD + 3.5 XC | k = k(55)                | 2.00E-13         |
| 377    | XBAL + RO2C = RO2C + 0.5 BALD + 3.5 XC | k = k(56)                | 3.50E-14         |
| 378    | XBAL + RO2X = RO2X + 0.5 BALD + 3.5 XC | k = k(56)                | 3.50E-14         |
| 379    | XBAL + MCO3 = MCO3 + BALD              | k = k(70)                | 1.56E-11         |
| 380    | XBAL + RCO3 = RCO3 + BALD              | k = k(70)                | 1.56E-11         |
| 381    | XBAL + BZC3 = BZC3 + BALD              | k = k(70)                | 1.56E-11         |
| 382    | XBAL + MAC3 = MAC3 + BALD              | k = k(70)                | 1.56E-11         |
| 383    | XAF1 + NO = NO + AFG1                  | k = k(52)                | 9.23E-12         |
| 384    | XAF1 + HO2 = HO2 + 5. XC               | k = k(53)                | 7.63E-12         |
| 385    | XAF1 + NO3 = NO3 + AFG1                | k = k(54)                | 2.30E-12         |
| 386    | XAF1 + MEO2 = MEO2 + 0.5 AFG1 + 2.5 XC | k = k(55)                | 2.00E-13         |
| 387    | XAF1 + RO2C = RO2C + 0.5 AFG1 + 2.5 XC | k = k(56)                | 3.50E-14         |
| 388    | XAF1 + RO2X = RO2X + 0.5 AFG1 + 2.5 XC | k = k(56)                | 3.50E-14         |
| 389    | XAF1 + MCO3 = MCO3 + AFG1              | k = k(70)                | 1.56E-11         |
| 390    | XAF1 + RCO3 = RCO3 + AFG1              | k = k(70)                | 1.56E-11         |
| 391    | XAF1 + BZC3 = BZC3 + AFG1              | k = k(70)                | 1.56E-11         |
| 392    | XAF1 + MAC3 = MAC3 + AFG1              | k = k(70)                | 1.56E-11         |
| 393    | XAF2 + NO = NO + AFG2                  | k = k(52)                | 9.23E-12         |
| 394    | XAF2 + HO2 = HO2 + 5. XC               | k = k(53)                | 7.63E-12         |
| 395    | XAF2 + NO3 = NO3 + AFG2                | k = k(54)                | 2.30E-12         |
| 396    | XAF2 + MEO2 = MEO2 + 0.5 AFG2 + 2.5 XC | k = k(55)                | 2.00E-13         |
| 397    | XAF2 + RO2C = RO2C + 0.5 AFG2 + 2.5 XC | k = k(56)                | 3.50E-14         |
| 398    | XAF2 + RO2X = RO2X + 0.5 AFG2 + 2.5 XC | k = k(56)                | 3.50E-14         |
| 399    | XAF2 + MCO3 = MCO3 + AFG2              | k = k(70)                | 1.56E-11         |
| 400    | XAF2 + RCO3 = RCO3 + AFG2              | k = k(70)                | 1.56E-11         |
| 401    | XAF2 + BZC3 = BZC3 + AFG2              | k = k(70)                | 1.56E-11         |
| 402    | XAF2 + MAC3 = MAC3 + AFG2              | k = k(70)                | 1.56E-11         |
| 403    | XAF3 + NO = NO + AFG3                  | k = k(52)                | 9.23E-12         |
| 404    | XAF3 + HO2 = HO2 + 7. XC               | k = k(53)                | 7.63E-12         |
| 405    | XAF3 + NO3 = NO3 + AFG3                | k = k(54)                | 2.30E-12         |

| Number | Reactants and Products                         | Rate Constant Expression | k <sub>300</sub> |
|--------|------------------------------------------------|--------------------------|------------------|
| 406    | XAF3 + MEO2 = MEO2 + 0.5 AFG3 + 3.5 XC         | k = k(55)                | 2.00E-13         |
| 407    | XAF3 + RO2C = RO2C + 0.5 AFG3 + 3.5 XC         | k = k(56)                | 3.50E-14         |
| 408    | XAF3 + RO2X = RO2X + 0.5 AFG3 + 3.5 XC         | k = k(56)                | 3.50E-14         |
| 409    | XAF3 + MCO3 = MCO3 + AFG3                      | k = k(70)                | 1.56E-11         |
| 410    | XAF3 + RCO3 = RCO3 + AFG3                      | k = k(70)                | 1.56E-11         |
| 411    | XAF3 + BZC3 = BZC3 + AFG3                      | k = k(70)                | 1.56E-11         |
| 412    | XAF3 + MAC3 = MAC3 + AFG3                      | k = k(70)                | 1.56E-11         |
| 413    | XMAC + NO = NO + MACR                          | k = k(52)                | 9.23E-12         |
| 414    | XMAC + HO2 = HO2 + 4. XC                       | k = k(53)                | 7.63E-12         |
| 415    | XMAC + NO3 = NO3 + MACR                        | k = k(54)                | 2.30E-12         |
| 416    | XMAC + MEO2 = MEO2 + 0.5 MACR + 2. XC          | k = k(55)                | 2.00E-13         |
| 417    | XMAC + RO2C = RO2C + 0.5 MACR + 2. XC          | k = k(56)                | 3.50E-14         |
| 418    | XMAC + RO2X = RO2X + 0.5 MACR + 2. XC          | k = k(56)                | 3.50E-14         |
| 419    | XMAC + MCO3 = MCO3 + MACR                      | k = k(70)                | 1.56E-11         |
| 420    | XMAC + RCO3 = RCO3 + MACR                      | k = k(70)                | 1.56E-11         |
| 421    | XMAC + BZC3 = BZC3 + MACR                      | k = k(70)                | 1.56E-11         |
| 422    | XMAC + MAC3 = MAC3 + MACR                      | k = k(70)                | 1.56E-11         |
| 423    | XMVK + NO = NO + MVK                           | k = k(52)                | 9.23E-12         |
| 424    | XMVK + HO2 = HO2 + 4. XC                       | k = k(53)                | 7.63E-12         |
| 425    | XMVK + NO3 = NO3 + MVK                         | k = k(54)                | 2.30E-12         |
| 426    | XMVK + MEO2 = MEO2 + 0.5 MVK + 2. XC           | k = k(55)                | 2.00E-13         |
| 427    | XMVK + RO2C = RO2C + 0.5 MVK + 2. XC           | k = k(56)                | 3.50E-14         |
| 428    | XMVK + RO2X = RO2X + 0.5 MVK + 2. XC           | k = k(56)                | 3.50E-14         |
| 429    | XMVK + MCO3 = MCO3 + MVK                       | k = k(70)                | 1.56E-11         |
| 430    | XMVK + RCO3 = RCO3 + MVK                       | k = k(70)                | 1.56E-11         |
| 431    | XMVK + BZC3 = BZC3 + MVK                       | k = k(70)                | 1.56E-11         |
| 432    | XMVK + MAC3 = MAC3 + MVK                       | k = k(70)                | 1.56E-11         |
| 433    | XIPR + NO = NO + IPRD                          | k = k(52)                | 9.23E-12         |
| 434    | XIPR + HO2 = HO2 + 5. XC                       | k = k(53)                | 7.63E-12         |
| 435    | XIPR + NO3 = NO3 + IPRD                        | k = k(54)                | 2.30E-12         |
| 436    | XIPR + MEO2 = MEO2 + 0.5 IPRD + 2.5 XC         | k = k(55)                | 2.00E-13         |
| 437    | XIPR + RO2C = RO2C + 0.5 IPRD + 2.5 XC         | k = k(56)                | 3.50E-14         |
| 438    | XIPR + RO2X = RO2X + 0.5 IPRD + 2.5 XC         | k = k(56)                | 3.50E-14         |
| 439    | XIPR + MCO3 = MCO3 + IPRD                      | k = k(70)                | 1.56E-11         |
| 440    | XIPR + RCO3 = RCO3 + IPRD                      | k = k(70)                | 1.56E-11         |
| 441    | XIPR + BZC3 = BZC3 + IPRD                      | k = k(70)                | 1.56E-11         |
| 442    | XIPR + MAC3 = MAC3 + IPRD                      | k = k(70)                | 1.56E-11         |
| 443    | XRN3 + NO = NO + RNO3                          | k = k(52)                | 9.23E-12         |
| 444    | XRN3 + HO2 = HO2 + 6. XC + XN                  | k = k(53)                | 7.63E-12         |
| 445    | XRN3 + NO3 = NO3 + RNO3                        | k = k(54)                | 2.30E-12         |
| 446    | XRN3 + MEO2 = MEO2 + 0.5 RNO3 + 0.5 XN + 3. XC | k = k(55)                | 2.00E-13         |
| 447    | XRN3 + RO2C = RO2C + 0.5 RNO3 + 0.5 XN + 3. XC | k = k(56)                | 3.50E-14         |
| 448    | XRN3 + RO2X = RO2X + 0.5 RNO3 + 0.5 XN + 3. XC | k = k(56)                | 3.50E-14         |
| 449    | XRN3 + MCO3 = MCO3 + RNO3                      | k = k(70)                | 1.56E-11         |
| 450    | XRN3 + RCO3 = RCO3 + RNO3                      | k = k(70)                | 1.56E-11         |
| 451    | XRN3 + BZC3 = BZC3 + RNO3                      | k = k(70)                | 1.56E-11         |
| 452    | XRN3 + MAC3 = MAC3 + RNO3                      | k = k(70)                | 1.56E-11         |
| 453    | YRPX + NO = NO                                 | k = k(52)                | 9.23E-12         |
| 454    | YRPX + HO2 = HO2 + ROOH - 3. XC                | k = k(53)                | 7.63E-12         |
| 455    | YRPX + NO3 = NO3                               | k = k(54)                | 2.30E-12         |

| Number | Reactants and Products                          | Rate Constant Expression | k <sub>300</sub> |
|--------|-------------------------------------------------|--------------------------|------------------|
| 456    | YRPX + MEO2 = MEO2 + 0.5 MEK - 2. XC            | k = k(55)                | 2.00E-13         |
| 457    | YRPX + RO2C = RO2C + 0.5 MEK - 2. XC            | k = k(56)                | 3.50E-14         |
| 458    | YRPX + RO2X = RO2X + 0.5 MEK - 2. XC            | k = k(56)                | 3.50E-14         |
| 459    | YRPX + MCO3 = MCO3                              | k = k(70)                | 1.56E-11         |
| 460    | YRPX + RCO3 = RCO3                              | k = k(70)                | 1.56E-11         |
| 461    | YRPX + BZC3 = BZC3                              | k = k(70)                | 1.56E-11         |
| 462    | YRPX + MAC3 = MAC3                              | k = k(70)                | 1.56E-11         |
| 463    | Y6PX + NO = NO                                  | k = k(52)                | 9.23E-12         |
| 464    | Y6PX + HO2 = HO2 + R6PX - 6. XC                 | k = k(53)                | 7.63E-12         |
| 465    | Y6PX + NO3 = NO3                                | k = k(54)                | 2.30E-12         |
| 466    | Y6PX + MEO2 = MEO2 + 0.5 PRD2 - 3. XC           | k = k(55)                | 2.00E-13         |
| 467    | Y6PX + RO2C = RO2C + 0.5 PRD2 - 3. XC           | k = k(56)                | 3.50E-14         |
| 468    | Y6PX + RO2X = RO2X + 0.5 PRD2 - 3. XC           | k = k(56)                | 3.50E-14         |
| 469    | Y6PX + MCO3 = MCO3                              | k = k(70)                | 1.56E-11         |
| 470    | Y6PX + RCO3 = RCO3                              | k = k(70)                | 1.56E-11         |
| 471    | Y6PX + BZC3 = BZC3                              | k = k(70)                | 1.56E-11         |
| 472    | Y6PX + MAC3 = MAC3                              | k = k(70)                | 1.56E-11         |
| 473    | YAPX + NO = NO                                  | k = k(52)                | 9.23E-12         |
| 474    | YAPX + HO2 = HO2 + RAPX - 8. XC                 | k = k(53)                | 7.63E-12         |
| 475    | YAPX + NO3 = NO3                                | k = k(54)                | 2.30E-12         |
| 476    | YAPX + MEO2 = MEO2 + 0.5 PRD2 - 3. XC           | k = k(55)                | 2.00E-13         |
| 477    | YAPX + RO2C = RO2C + 0.5 PRD2 - 3. XC           | k = k(56)                | 3.50E-14         |
| 478    | YAPX + RO2X = RO2X + 0.5 PRD2 - 3. XC           | k = k(56)                | 3.50E-14         |
| 479    | YAPX + MCO3 = MCO3                              | k = k(70)                | 1.56E-11         |
| 480    | YAPX + RCO3 = RCO3                              | k = k(70)                | 1.56E-11         |
| 481    | YAPX + BZC3 = BZC3                              | k = k(70)                | 1.56E-11         |
| 482    | YAPX + MAC3 = MAC3                              | k = k(70)                | 1.56E-11         |
| 483    | ZRN3 + NO = NO + RNO3 - 1. XN                   | k = k(52)                | 9.23E-12         |
| 484    | ZRN3 + HO2 = HO2 + 6. XC                        | k = k(53)                | 7.63E-12         |
| 485    | ZRN3 + NO3 = NO3 + PRD2 + HO2                   | k = k(54)                | 2.30E-12         |
| 486    | ZRN3 + MEO2 = MEO2 + 0.5 PRD2 + 0.5 HO2 + 3. XC | k = k(55)                | 2.00E-13         |
| 487    | ZRN3 + RO2C = RO2C + 0.5 PRD2 + 0.5 HO2 + 3. XC | k = k(56)                | 3.50E-14         |
| 488    | ZRN3 + RO2X = RO2X + 0.5 PRD2 + 0.5 HO2 + 3. XC | k = k(56)                | 3.50E-14         |
| 489    | ZRN3 + MCO3 = MCO3 + PRD2 + HO2                 | k = k(70)                | 1.56E-11         |
| 490    | ZRN3 + RCO3 = RCO3 + PRD2 + HO2                 | k = k(70)                | 1.56E-11         |
| 491    | ZRN3 + BZC3 = BZC3 + PRD2 + HO2                 | k = k(70)                | 1.56E-11         |
| 492    | ZRN3 + MAC3 = MAC3 + PRD2 + HO2                 | k = k(70)                | 1.56E-11         |
| 493    | XGLD + NO = NO + GLYD                           | k = k(52)                | 9.23E-12         |
| 494    | XGLD + HO2 = HO2 + 2. XC                        | k = k(53)                | 7.63E-12         |
| 495    | XGLD + NO3 = NO3 + GLYD                         | k = k(54)                | 2.30E-12         |
| 496    | XGLD + MEO2 = MEO2 + 0.5 GLYD + XC              | k = k(55)                | 2.00E-13         |
| 497    | XGLD + RO2C = RO2C + 0.5 GLYD + XC              | k = k(56)                | 3.50E-14         |
| 498    | XGLD + RO2X = RO2X + 0.5 GLYD + XC              | k = k(56)                | 3.50E-14         |
| 499    | XGLD + MCO3 = MCO3 + GLYD                       | k = k(70)                | 1.56E-11         |
| 500    | XGLD + RCO3 = RCO3 + GLYD                       | k = k(70)                | 1.56E-11         |
| 501    | XGLD + BZC3 = BZC3 + GLYD                       | k = k(70)                | 1.56E-11         |
| 502    | XGLD + MAC3 = MAC3 + GLYD                       | k = k(70)                | 1.56E-11         |
| 503    | XACR + NO = NO + ACRO                           | k = k(52)                | 9.23E-12         |
| 504    | XACR + HO2 = HO2 + 3. XC                        | k = k(53)                | 7.63E-12         |
| 505    | XACR + NO3 = NO3 + ACRO                         | k = k(54)                | 2.30E-12         |

| Number | Reactants and Products                                                                                                                                                       | Rate Constant Expression                                                               | k <sub>300</sub> |
|--------|------------------------------------------------------------------------------------------------------------------------------------------------------------------------------|----------------------------------------------------------------------------------------|------------------|
| 506    | XACR + MEO2 = MEO2 + 0.5 ACRO + 1.5 XC                                                                                                                                       | k = k(55)                                                                              | 2.00E-13         |
| 507    | XACR + RO2C = RO2C + 0.5 ACRO + 1.5 XC                                                                                                                                       | k = k(56)                                                                              | 3.50E-14         |
| 508    | XACR + RO2X = RO2X + 0.5 ACRO + 1.5 XC                                                                                                                                       | k = k(56)                                                                              | 3.50E-14         |
| 509    | XACR + MCO3 = MCO3 + ACRO                                                                                                                                                    | k = k(70)                                                                              | 1.56E-11         |
| 510    | XACR + RCO3 = RCO3 + ACRO                                                                                                                                                    | k = k(70)                                                                              | 1.56E-11         |
| 511    | XACR + BZC3 = BZC3 + ACRO                                                                                                                                                    | k = k(70)                                                                              | 1.56E-11         |
| 512    | XACR + MAC3 = MAC3 + ACRO                                                                                                                                                    | k = k(70)                                                                              | 1.56E-11         |
| 513    | CH4 + OH = MEO2                                                                                                                                                              | k = 1.85E-12 exp(-1690/T)                                                              | 6.62E-15         |
| 514    | ETHE + OH = XHO2 + RO2C + 1.61 XHCH + 0.195 XGLD + YRPX                                                                                                                      | Falloff: F=0.6; n=1<br>k(0) = 1.00E-28 (T/300)^-4.5<br>k(inf) = 8.80E-12 (T/300)^-0.85 | 8.15E-12         |
| 515    | ETHE + O3 = 0.16 HO2 + 0.16 OH + 0.51 CO + 0.12 CO2 + HCHO + 0.37 FACD                                                                                                       | k = 9.14E-15 exp(-2580/T)                                                              | 1.68E-18         |
| 516    | ETHE + NO3 = XHO2 + RO2C + XRCH + YRPX + XN - 1. XC                                                                                                                          | k = 3.30E-12 (T/300)^2 exp(-2880/T)                                                    | 2.24E-16         |
| 517    | ETHE + O3P = 0.8 HO2 + 0.29 XHO2 + 0.51 MEO2 + 0.29 RO2C + 0.51 CO + 0.278 XCO + 0.278 XHCH + 0.1 CCHO + 0.012 XGLY + 0.29 YRPX + 0.2 XC                                     | k = 1.07E-11 exp(-800/T)                                                               | 7.43E-13         |
| 518    | PRPE + OH = 0.984 XHO2 + 0.984 RO2C + 0.016 RO2X + 0.016 ZRN3 + 0.984 XHCH + 0.984 XCCH + YRPX - 0.048 XC                                                                    | k = 4.85E-12 exp(504/T)                                                                | 2.60E-11         |
| 519    | PRPE + O3 = 0.165 HO2 + 0.35 OH + 0.355 MEO2 + 0.525 CO + 0.215 CO2 + 0.5 HCHO + 0.5 CCHO + 0.185 FACD + 0.075 AACD + 0.07 XC                                                | k = 5.51E-15 exp(-1878/T)                                                              | 1.05E-17         |
| 520    | PRPE + NO3 = 0.949 XHO2 + 0.949 RO2C + 0.051 RO2X + 0.051 ZRN3 + YRPX + XN + 2.694 XC                                                                                        | k = 4.59E-13 exp(-1156/T)                                                              | 9.73E-15         |
| 521    | PRPE + O3P = 0.45 RCHO + 0.55 MEK - 0.55 XC                                                                                                                                  | k = 1.02E-11 exp(-280/T)                                                               | 4.01E-12         |
| 522    | BD13 + OH = 0.951 XHO2 + 1.189 RO2C + 0.049 RO2X + 0.049 ZRN3 + 0.708 XHCH + 0.48 XACR + 0.471 XIPR + YRPX - 0.797 XC                                                        | k = 1.48E-11 exp(448/T)                                                                | 6.59E-11         |
| 523    | BD13 + O3 = 0.08 HO2 + 0.08 OH + 0.255 CO + 0.185 CO2 + 0.5 HCHO + 0.185 FACD + 0.5 ACRO + 0.375 MVK + 0.125 PRD2 - 0.875 XC                                                 | k = 1.34E-14 exp(-2283/T)                                                              | 6.64E-18         |
| 524    | BD13 + NO3 = 0.815 XHO2 + 0.12 XNO2 + 1.055 RO2C + 0.065 RO2X + 0.065 ZRN3 + 0.115 XHCH + 0.46 XMVK + 0.12 XIPR + 0.355 XRN3 + YRPX + 0.525 XN - 1.075 XC                    | k = 1.00E-13                                                                           | 1.00E-13         |
| 525    | BD13 + O3P = 0.25 HO2 + 0.117 XHO2 + 0.118 XMA3 + 0.235 RO2C + 0.015 RO2X + 0.015 ZRN3 + 0.115 XCO + 0.115 XACR + 0.001 XAF1 + 0.001 XAF2 + 0.75 PRD2 + 0.25 YRPX - 1.532 XC | k = 2.26E-11 exp(-40/T)                                                                | 1.98E-11         |
| 526    | ISOP + OH = 0.907 XHO2 + 0.986 RO2C + 0.093 RO2X + 0.093 ZRN3 + 0.624 XHCH + 0.23 XMAC + 0.32 XMVK + 0.357 XIPR + Y6PX - 0.167 XC                                            | k = 2.54E-11 exp(410/T)                                                                | 9.96E-11         |

| Number | Reactants and Products                                                                                                                                                                                                                                             | Rate Constant Expression                                                          | k <sub>300</sub> |
|--------|--------------------------------------------------------------------------------------------------------------------------------------------------------------------------------------------------------------------------------------------------------------------|-----------------------------------------------------------------------------------|------------------|
| 527    | ISOP + O3 = 0.066 HO2 + 0.266 OH + 0.192 XMA3 + 0.192 RO2C + 0.008 RO2X + 0.008 ZRN3 + 0.275 CO + 0.122 CO2 + 0.4 HCHO + 0.192 XHCH + 0.204 FACD + 0.39 MACR + 0.16 MVK + 0.15 IPRD + 0.1 PRD2 + 0.2 Y6PX - 0.559 XC                                               | k = 7.86E-15 exp(-1912/T)                                                         | 1.34E-17         |
| 528    | ISOP + NO3 = 0.749 XHO2 + 0.187 XNO2 + 0.936 RO2C + 0.064 RO2X + 0.064 ZRN3 + 0.936 XIPIR + Y6PX + 0.813 XN - 0.064 XC                                                                                                                                             | k = 3.03E-12 exp(-448/T)                                                          | 6.81E-13         |
| 529    | ISOP + O3P = 0.25 MEO2 + 0.24 XMA3 + 0.24 RO2C + 0.01 RO2X + 0.01 ZRN3 + 0.24 XHCH + 0.75 PRD2 + 0.25 Y6PX - 1.01 XC                                                                                                                                               | k = 3.50E-11                                                                      | 3.50E-11         |
| 530    | APIN + OH = 0.799 XHO2 + 0.004 XRC3 + 1.042 RO2C + 0.197 RO2X + 0.197 ZRN3 + 0.002 XCO + 0.022 XHCH + 0.776 XRCH + 0.034 XACE + 0.02 XMGL + 0.023 XBAC + Y6PX + 6.2 XC                                                                                             | k = 1.21E-11 exp(436/T)                                                           | 5.18E-11         |
| 531    | APIN + O3 = 0.009 HO2 + 0.102 XHO2 + 0.728 OH + 0.001 XMC3 + 0.297 XRC3 + 1.511 RO2C + 0.337 RO2X + 0.337 ZRN3 + 0.029 CO + 0.051 XCO + 0.017 CO2 + 0.344 XHCH + 0.24 XRCH + 0.345 XACE + 0.008 MEK + 0.002 XGLY + 0.081 XBAC + 0.255 PRD2 + 0.737 Y6PX + 2.999 XC | k = 5.00E-16 exp(-530/T)                                                          | 8.55E-17         |
| 532    | APIN + NO3 = 0.056 XHO2 + 0.643 XNO2 + 0.007 XRC3 + 1.05 RO2C + 0.293 RO2X + 0.293 ZRN3 + 0.005 XCO + 0.007 XHCH + 0.684 XRCH + 0.069 XACE + 0.002 XMGL + 0.056 XRN3 + Y6PX + 0.301 XN + 5.608 XC                                                                  | k = 1.19E-12 exp(490/T)                                                           | 6.09E-12         |
| 533    | APIN + O3P = PRD2 + 4. XC                                                                                                                                                                                                                                          | k = 3.20E-11                                                                      | 3.20E-11         |
| 534    | ACYE + OH = 0.3 HO2 + 0.7 OH + 0.3 CO + 0.3 FACD + 0.7 GLY                                                                                                                                                                                                         | Falloff: F=0.6; n=1<br>k(0) = 5.50E-30 (T/300) <sup>-2</sup><br>k(inf) = 8.30E-13 | 7.56E-13         |
| 535    | ACYE + O3 = 1.5 HO2 + 0.5 OH + 1.5 CO + 0.5 CO2                                                                                                                                                                                                                    | k = 1.00E-14 exp(-4100/T)                                                         | 1.16E-20         |
| 536    | BENZ + OH = 0.57 HO2 + 0.29 XHO2 + 0.116 OH + 0.29 RO2C + 0.024 RO2X + 0.024 ZRN3 + 0.29 XGLY + 0.57 CRES + 0.029 XAF1 + 0.261 XAF2 + 0.116 AFG3 + 0.314 YAPX - 0.976 XC                                                                                           | k = 2.33E-12 exp(-193/T)                                                          | 1.22E-12         |
| 537    | TOLU + OH = 0.181 HO2 + 0.454 XHO2 + 0.312 OH + 0.454 RO2C + 0.054 RO2X + 0.054 ZRN3 + 0.238 XGLY + 0.151 XMGL + 0.181 CRES + 0.065 XBAL + 0.195 XAF1 + 0.195 XAF2 + 0.312 AFG3 + 0.073 Y6PX + 0.435 YAPX - 0.109 XC                                               | k = 1.81E-12 exp(338/T)                                                           | 5.58E-12         |
| 538    | MXYL + OH = 0.159 HO2 + 0.52 XHO2 + 0.239 OH + 0.52 RO2C + 0.082 RO2X + 0.082 ZRN3 + 0.1 XGLY + 0.38 XMGL + 0.159 CRES + 0.041 XBAL + 0.336 XAF1 + 0.144 XAF2 + 0.239 AFG3 + 0.047 Y6PX + 0.555 YAPX + 0.695 XC                                                    | k = 2.31E-11                                                                      | 2.31E-11         |
| 539    | OXYL + OH = 0.161 HO2 + 0.554 XHO2 + 0.198 OH + 0.554 RO2C + 0.087 RO2X + 0.087 ZRN3 + 0.084 XGLY + 0.238 XMGL + 0.185 XBAC + 0.161 CRES + 0.047 XBAL + 0.253 XAF1 + 0.253 XAF2 + 0.198 AFG3 + 0.055 Y6PX + 0.586 YAPX + 0.484 XC                                  | k = 1.36E-11                                                                      | 1.36E-11         |

| Number | Reactants and Products                                                                                                                                                                                                                                         | Rate Constant Expression                      | k <sub>300</sub> |
|--------|----------------------------------------------------------------------------------------------------------------------------------------------------------------------------------------------------------------------------------------------------------------|-----------------------------------------------|------------------|
| 540    | PXYL + OH = 0.159 HO2 + 0.487 XHO2 + 0.278 OH + 0.487 RO2C + 0.076 RO2X + 0.076 ZRN3 + 0.286 XGLY + 0.112 XMGL + 0.159 CRES + 0.088 XBAL + 0.045 XAF1 + 0.067 XAF2 + 0.278 AFG3 + 0.286 XAF3 + 0.102 Y6PX + 0.461 YAPX + 0.399 XC                              | k = 1.43E-11                                  | 1.43E-11         |
| 541    | B124 + OH = 0.022 HO2 + 0.627 XHO2 + 0.23 OH + 0.627 RO2C + 0.121 RO2X + 0.121 ZRN3 + 0.074 XGLY + 0.405 XMGL + 0.112 XBAC + 0.022 CRES + 0.036 XBAL + 0.088 XAF1 + 0.352 XAF2 + 0.23 AFG3 + 0.151 XAF3 + 0.043 Y6PX + 0.705 YAPX + 1.19 XC                    | k = 3.25E-11                                  | 3.25E-11         |
| 542    | ETOH + OH = 0.95 HO2 + 0.05 XHO2 + 0.05 RO2C + 0.081 XHCH + 0.95 CCHO + 0.01 XGLD + 0.05 YRPX - 0.001 XC                                                                                                                                                       | k = 5.49E-13 (T/300) <sup>2</sup> exp(530/T)  | 3.21E-12         |
| 543    | ALK1 + OH = XHO2 + RO2C + XCCH + YRPX                                                                                                                                                                                                                          | k = 1.34E-12 (T/300) <sup>2</sup> exp(-499/T) | 2.54E-13         |
| 544    | ALK2 + OH = 0.965 XHO2 + 0.965 RO2C + 0.035 RO2X + 0.035 ZRN3 + 0.261 XRCH + 0.704 XACE + YRPX - 0.105 XC                                                                                                                                                      | k = 1.49E-12 (T/300) <sup>2</sup> exp(-87/T)  | 1.11E-12         |
| 545    | ALK3 + OH = 0.695 XHO2 + 0.236 XTBU + 1.253 RO2C + 0.07 RO2X + 0.07 ZRN3 + 0.026 XHCH + 0.445 XCCH + 0.122 XRCH + 0.024 XACE + 0.332 XMEK + 0.983 YRPX + 0.017 Y6PX - 0.046 XC                                                                                 | k = 1.51E-12 exp(126/T)                       | 2.30E-12         |
| 546    | ALK4 + OH = 0.83 XHO2 + 0.01 XMEO + 0.011 XMC3 + 1.763 RO2C + 0.149 RO2X + 0.149 ZRN3 + 0.002 XCO + 0.029 XHCH + 0.438 XCCH + 0.236 XRCH + 0.426 XACE + 0.106 XMEK + 0.146 XPD2 + Y6PX - 0.119 XC                                                              | k = 3.75E-12 exp(44/T)                        | 4.34E-12         |
| 547    | ALK5 + OH = 0.647 XHO2 + 1.605 RO2C + 0.353 RO2X + 0.353 ZRN3 + 0.04 XHCH + 0.106 XCCH + 0.209 XRCH + 0.071 XACE + 0.086 XMEK + 0.407 XPD2 + Y6PX + 2.004 XC                                                                                                   | k = 2.70E-12 exp(374/T)                       | 9.39E-12         |
| 548    | OLE1 + OH = 0.871 XHO2 + 0.001 XMEO + 1.202 RO2C + 0.128 RO2X + 0.128 ZRN3 + 0.582 XHCH + 0.01 XCCH + 0.007 XGLD + 0.666 XRCH + 0.007 XACE + 0.036 XACR + 0.001 XMAC + 0.012 XMVK + 0.009 XIPR + 0.168 XPD2 + 0.169 YRPX + 0.831 Y6PX + 0.383 XC               | k = 6.72E-12 exp(501/T)                       | 3.57E-11         |
| 549    | OLE1 + O3 = 0.095 HO2 + 0.057 XHO2 + 0.128 OH + 0.09 RO2C + 0.005 RO2X + 0.005 ZRN3 + 0.303 CO + 0.088 CO2 + 0.5 HCHO + 0.011 XCCH + 0.5 RCHO + 0.044 XRCH + 0.003 XACE + 0.009 MEK + 0.185 FACD + 0.159 PACD + 0.268 PRD2 + 0.011 YRPX + 0.052 Y6PX + 0.11 XC | k = 3.19E-15 exp(-1701/T)                     | 1.10E-17         |
| 550    | OLE1 + NO3 = 0.772 XHO2 + 1.463 RO2C + 0.228 RO2X + 0.228 ZRN3 + 0.013 XCCH + 0.003 XRCH + 0.034 XACE + 0.774 XRN3 + 0.169 YRPX + 0.831 Y6PX + 0.226 XN - 1.149 XC                                                                                             | k = 5.37E-13 exp(-1047/T)                     | 1.64E-14         |
| 551    | OLE1 + O3P = 0.45 RCHO + 0.39 MEK + 0.16 PRD2 + 1.13 XC                                                                                                                                                                                                        | k = 1.61E-11 exp(-326/T)                      | 5.43E-12         |

| Number | Reactants and Products                                                                                                                                                                                                                                                                                                                                         | Rate Constant Expression  | k <sub>300</sub> |
|--------|----------------------------------------------------------------------------------------------------------------------------------------------------------------------------------------------------------------------------------------------------------------------------------------------------------------------------------------------------------------|---------------------------|------------------|
| 552    | OLE2 + OH = 0.912 XHO2 + 0.953 RO2C + 0.088 RO2X + 0.088 ZRN3 + 0.179 XHCH + 0.835 XCCH + 0.51 XRCH + 0.144 XACE + 0.08 XMEK + 0.002 XMVK + 0.012 XIPR + 0.023 XPD2 + 0.319 YRPX + 0.681 Y6PX + 0.135 XC                                                                                                                                                       | k = 1.26E-11 exp(488/T)   | 6.41E-11         |
| 553    | OLE2 + O3 = 0.094 HO2 + 0.041 XHO2 + 0.443 OH + 0.307 MEO2 + 0.156 XMC3 + 0.008 XRC3 + 0.212 RO2C + 0.003 RO2X + 0.003 ZRN3 + 0.299 CO + 0.161 CO2 + 0.131 HCHO + 0.114 XHCH + 0.453 CCHO + 0.071 XCCH + 0.333 RCHO + 0.019 XRCH + 0.051 ACET + 0.033 MEK + 0.001 XMEK + 0.024 FACD + 0.065 AACD + 0.235 PACD + 0.037 PRD2 + 0.073 YRPX + 0.136 Y6PX + 0.16 XC | k = 8.59E-15 exp(-1255/T) | 1.31E-16         |
| 554    | OLE2 + NO3 = 0.4 XHO2 + 0.426 XNO2 + 0.035 XMEO + 1.193 RO2C + 0.14 RO2X + 0.14 ZRN3 + 0.072 XHCH + 0.579 XCCH + 0.163 XRCH + 0.116 XACE + 0.002 XMEK + 0.32 XRN3 + 0.319 YRPX + 0.681 Y6PX + 0.254 XN + 0.13 XC                                                                                                                                               | k = 2.31E-13 exp(382/T)   | 8.25E-13         |
| 555    | OLE2 + O3P = 0.079 RCHO + 0.751 MEK + 0.17 PRD2 + 0.739 XC                                                                                                                                                                                                                                                                                                     | k = 1.43E-11 exp(111/T)   | 2.07E-11         |
| 556    | ARO1 + OH = 0.123 HO2 + 0.566 XHO2 + 0.202 OH + 0.566 RO2C + 0.11 RO2X + 0.11 ZRN3 + 0.158 XGLY + 0.1 XMGL + 0.123 CRES + 0.072 XAF1 + 0.185 XAF2 + 0.202 AFG3 + 0.309 XPD2 + 0.369 Y6PX + 0.31 XC                                                                                                                                                             | k = 7.84E-12              | 7.84E-12         |
| 557    | ARO2 + OH = 0.077 HO2 + 0.617 XHO2 + 0.178 OH + 0.617 RO2C + 0.128 RO2X + 0.128 ZRN3 + 0.088 XGLY + 0.312 XMGL + 0.134 XBAC + 0.077 CRES + 0.026 XBAL + 0.221 XAF1 + 0.247 XAF2 + 0.178 AFG3 + 0.068 XAF3 + 0.057 XPD2 + 0.101 Y6PX + 1.459 XC                                                                                                                 | k = 3.09E-11              | 3.09E-11         |
| 558    | TERP + OH = 0.734 XHO2 + 0.064 XRC3 + 1.211 RO2C + 0.201 RO2X + 0.201 ZRN3 + 0.001 XCO + 0.411 XHCH + 0.385 XRCH + 0.037 XACE + 0.007 XMEK + 0.003 XMGL + 0.009 XBAC + 0.003 XMVK + 0.002 XIPR + 0.409 XPD2 + Y6PX + 4.375 XC                                                                                                                                  | k = 2.27E-11 exp(435/T)   | 9.68E-11         |
| 559    | TERP + O3 = 0.078 HO2 + 0.046 XHO2 + 0.499 OH + 0.202 XMC3 + 0.059 XRC3 + 0.49 RO2C + 0.121 RO2X + 0.121 ZRN3 + 0.249 CO + 0.063 CO2 + 0.127 HCHO + 0.033 XHCH + 0.208 XRCH + 0.057 XACE + 0.002 MEK + 0.172 FACD + 0.068 PACD + 0.003 XMGL + 0.039 XBAC + 0.002 XMAC + 0.001 XIPR + 0.502 PRD2 + 0.428 Y6PX + 3.852 XC                                        | k = 8.28E-16 exp(-785/T)  | 6.05E-17         |
| 560    | TERP + NO3 = 0.227 XHO2 + 0.287 XNO2 + 0.026 XRC3 + 1.786 RO2C + 0.46 RO2X + 0.46 ZRN3 + 0.012 XCO + 0.023 XHCH + 0.002 XGLD + 0.403 XRCH + 0.239 XACE + 0.005 XMAC + 0.001 XMVK + 0.004 XIPR + 0.228 XRN3 + Y6PX + 0.485 XN + 3.785 XC                                                                                                                        | k = 1.33E-12 exp(490/T)   | 6.81E-12         |
| 561    | TERP + O3P = 0.237 RCHO + 0.763 PRD2 + 4.711 XC                                                                                                                                                                                                                                                                                                                | k = 4.02E-11              | 4.02E-11         |



| Number | Reactants and Products                                                                                                                                                                                                                                                                                                  | Rate Constant Expression | k <sub>300</sub> |
|--------|-------------------------------------------------------------------------------------------------------------------------------------------------------------------------------------------------------------------------------------------------------------------------------------------------------------------------|--------------------------|------------------|
| 562    | SESQ + OH = 0.734 XHO2 + 0.064 XRC3 + 1.211 RO2C + 0.201 RO2X + 0.201 ZRN3 + 0.001 XCO + 0.411 XHCH + 0.385 XRCH + 0.037 XACE + 0.007 XMEK + 0.003 XMGL + 0.009 XBAC + 0.003 XMKV + 0.002 XIPR + 0.409 XPD2 + Y6PX + 9.375 XC                                                                                           | k = k(558)               | 9.68E-11         |
| 563    | SESQ + O3 = 0.078 HO2 + 0.046 XHO2 + 0.499 OH + 0.202 XMC3 + 0.059 XRC3 + 0.49 RO2C + 0.121 RO2X + 0.121 ZRN3 + 0.249 CO + 0.063 CO2 + 0.127 HCHO + 0.033 XHCH + 0.208 XRCH + 0.057 XACE + 0.002 MEK + 0.172 FACD + 0.068 PACD + 0.003 XMGL + 0.039 XBAC + 0.002 XMAC + 0.001 XIPR + 0.502 PRD2 + 0.428 Y6PX + 8.852 XC | k = k(559)               | 6.05E-17         |
| 564    | SESQ + NO3 = 0.227 XHO2 + 0.287 XNO2 + 0.026 XRC3 + 1.786 RO2C + 0.46 RO2X + 0.46 ZRN3 + 0.012 XCO + 0.023 XHCH + 0.002 XCCH + 0.403 XRCH + 0.239 XACE + 0.005 XMAC + 0.001 XMKV + 0.004 XIPR + 0.228 XRN3 + Y6PX + 0.485 XN + 8.785 XC                                                                                 | k = k(560)               | 6.81E-12         |
| 565    | SESQ + O3P = 0.237 RCHO + 0.763 PRD2 + 9.711 XC                                                                                                                                                                                                                                                                         | k = k(561)               | 4.02E-11         |

**Table S8. Explicit species in the SAPRC07TC mechanism.**

| Species Name | Description                                                                                                                                                                         |
|--------------|-------------------------------------------------------------------------------------------------------------------------------------------------------------------------------------|
| BD13         | 1,3-butadiene                                                                                                                                                                       |
| AACD         | Acetic acid                                                                                                                                                                         |
| ACET         | Acetone                                                                                                                                                                             |
| ACRO         | Acrolein                                                                                                                                                                            |
| ACYE         | Acetylene                                                                                                                                                                           |
| AFG1         | Lumped photoreactive monounsaturated dicarbonyl aromatic fragmentation products that photolyze to form radicals                                                                     |
| AFG2         | Lumped photoreactive monounsaturated dicarbonyl aromatic fragmentation products that photolyze to form non-radical products                                                         |
| AFG3         | Lumped diunsaturated dicarbonyl aromatic fragmentation product.                                                                                                                     |
| ALK1         | Alkanes and other non-aromatic compounds that react only with OH, and have $k_{OH}$ between $2$ and $5E2$ $\text{ppm}^{-1} \text{min}^{-1}$ . (Primarily ethane)                    |
| ALK2         | Alkanes and other non-aromatic compounds that react only with OH, and have $k_{OH}$ between $5E2$ and $2.5E3$ $\text{ppm}^{-1} \text{min}^{-1}$ . (Primarily propane and acetylene) |
| ALK3         | Alkanes and other non-aromatic compounds that react only with OH, and have $k_{OH}$ between $2.5E3$ and $5E3$ $\text{ppm}^{-1} \text{min}^{-1}$ .                                   |
| ALK4         | Alkanes and other non-aromatic compounds that react only with OH, and have $k_{OH}$ between $5E3$ and $1E4$ $\text{ppm}^{-1} \text{min}^{-1}$ .                                     |
| ALK5         | Alkanes and other non-aromatic compounds that react only with OH, and have $k_{OH}$ greater than $1E4$ $\text{ppm}^{-1} \text{min}^{-1}$ .                                          |
| APIN         | $\alpha$ -pinene                                                                                                                                                                    |
| ARO1         | Aromatics with $k_{OH} < 2E4$ $\text{ppm}^{-1} \text{min}^{-1}$ .                                                                                                                   |
| ARO2         | Aromatics with $k_{OH} > 2E4$ $\text{ppm}^{-1} \text{min}^{-1}$ .                                                                                                                   |
| B124         | 1,2,4-trimethyl benzene                                                                                                                                                             |
| BACL         | Biacetyl                                                                                                                                                                            |
| BALD         | Aromatic aldehydes (e.g., benzaldehyde)                                                                                                                                             |
| BENZ         | Benzene                                                                                                                                                                             |
| BZC3         | Peroxyacyl radical formed from Aromatic Aldehydes                                                                                                                                   |
| BZO          | Phenoxy Radicals                                                                                                                                                                    |
| CCHO         | Acetaldehyde                                                                                                                                                                        |
| CO3H         | Peroxyacetic acid                                                                                                                                                                   |
| CH4          | Methane                                                                                                                                                                             |
| CO           | Carbon Monoxide                                                                                                                                                                     |
| CO2          | Carbon Dioxide                                                                                                                                                                      |
| COOH         | Methyl Hydroperoxide                                                                                                                                                                |
| CRES         | Phenols and Cresols                                                                                                                                                                 |
| ETHE         | Ethene                                                                                                                                                                              |
| ETOH         | Ethanol                                                                                                                                                                             |
| FACD         | Formic Acid                                                                                                                                                                         |
| GLY          | Glyoxal                                                                                                                                                                             |
| H2           | Hydrogen                                                                                                                                                                            |
| H2O          | Water                                                                                                                                                                               |
| HCHO         | Formaldehyde                                                                                                                                                                        |
| HNO3         | Nitric Acid                                                                                                                                                                         |
| PNA          | Peroxynitric Acid                                                                                                                                                                   |
| HO2          | Hydroperoxide Radicals                                                                                                                                                              |
| H2O2         | Hydrogen Peroxide                                                                                                                                                                   |
| GLYD         | Glycolaldehyde                                                                                                                                                                      |

| Species Name | Description                                                                                                                                                                                                                          |
|--------------|--------------------------------------------------------------------------------------------------------------------------------------------------------------------------------------------------------------------------------------|
| HONO         | Nitrous Acid                                                                                                                                                                                                                         |
| IPRD         | Lumped isoprene product species                                                                                                                                                                                                      |
| ISOP         | Isoprene                                                                                                                                                                                                                             |
| M            | Atmospheric pressure                                                                                                                                                                                                                 |
| MAC3         | Peroxyacyl radicals formed from methacrolein and other acroleins.                                                                                                                                                                    |
| MACR         | Methacrolein                                                                                                                                                                                                                         |
| MPAN         | PAN analogue formed from Methacrolein                                                                                                                                                                                                |
| MCO3         | Acetyl Peroxy Radicals                                                                                                                                                                                                               |
| MEK          | Ketones and other non-aldehyde oxygenated products which react with OH radicals faster than $5E-13$ but slower than $5E-12 \text{ cm}^3 \text{ molec}^{-2} \text{ sec}^{-1}$ . (Based on mechanism for methyl ethyl ketone).         |
| MEO2         | Methyl Peroxy Radicals                                                                                                                                                                                                               |
| MEOH         | Methanol                                                                                                                                                                                                                             |
| MGLY         | Methyl Glyoxal                                                                                                                                                                                                                       |
| MVK          | Methyl Vinyl Ketone                                                                                                                                                                                                                  |
| MXYL         | m-xylene                                                                                                                                                                                                                             |
| N2O5         | Nitrogen Pentoxide                                                                                                                                                                                                                   |
| NO           | Nitric Oxide                                                                                                                                                                                                                         |
| NO2          | Nitrogen Dioxide                                                                                                                                                                                                                     |
| NO3          | Nitrate Radical                                                                                                                                                                                                                      |
| NPHE         | Nitrophenols                                                                                                                                                                                                                         |
| O1D          | Excited Oxygen Atoms                                                                                                                                                                                                                 |
| O2           | Oxygen                                                                                                                                                                                                                               |
| O3           | Ozone                                                                                                                                                                                                                                |
| O3P          | Ground State Oxygen Atoms                                                                                                                                                                                                            |
| OH           | Hydroxyl Radicals                                                                                                                                                                                                                    |
| OLE1         | Alkenes (other than ethene) with $k_{OH} < 7E4 \text{ ppm}^{-1} \text{ min}^{-1}$ .                                                                                                                                                  |
| OLE2         | Alkenes with $k_{OH} > 7E4 \text{ ppm}^{-1} \text{ min}^{-1}$ .                                                                                                                                                                      |
| OXYL         | o-xylene                                                                                                                                                                                                                             |
| PACD         | Propanoic acid                                                                                                                                                                                                                       |
| PAN          | Peroxy Acetyl Nitrate                                                                                                                                                                                                                |
| PAN2         | PPN and other higher alkyl PAN analogues                                                                                                                                                                                             |
| PBZN         | PAN analogues formed from Aromatic Aldehydes                                                                                                                                                                                         |
| PRD2         | Ketones and other non-aldehyde oxygenated products which react with OH radicals faster than $5E-12 \text{ cm}^3 \text{ molec}^{-2} \text{ sec}^{-1}$                                                                                 |
| PRPE         | Propene                                                                                                                                                                                                                              |
| PXYL         | p-xylene                                                                                                                                                                                                                             |
| R6PX         | Lumped organic hydroperoxides with 5 or more carbons (other than those formed following OH addition to aromatic rings, which is represented separately). Mechanism based on that estimated for 3-hexyl hydroperoxide.                |
| RAPX         | Organic hydroperoxides formed following OH addition to aromatic rings, which is represented separately because of their probable role in SOA formation. Mechanism based on two isomers expected to be formed in the m-xylene system. |
| RCHO         | Lumped C3+ Aldehydes (mechanism based on propionaldehyde)                                                                                                                                                                            |
| RCO3         | Peroxy Propionyl and higher peroxy acyl Radicals                                                                                                                                                                                     |
| RO3H         | Higher organic peroxy acids (mechanism based on peroxypropionic acid).                                                                                                                                                               |
| RNO3         | Lumped Organic Nitrates                                                                                                                                                                                                              |

| Species Name | Description                                                                                                                                                                                                    |
|--------------|----------------------------------------------------------------------------------------------------------------------------------------------------------------------------------------------------------------|
| RO2C         | Peroxy Radical Operator representing NO to NO2 and NO3 to NO2 conversions, and the effects of peroxy radical reactions on acyl peroxy and other peroxy radicals.                                               |
| RO2X         | Peroxy Radical Operator representing NO consumption (used in conjunction with organic nitrate formation), and the effects of peroxy radical reactions on NO3, acyl peroxy radicals, and other peroxy radicals. |
| ROOH         | Lumped organic hydroperoxides with 2-4 carbons. Mechanism based on that estimated for n-propyl hydroperoxide.                                                                                                  |
| SESQ         | Sesquiterpenes                                                                                                                                                                                                 |
| SO2          | Sulfur Dioxide                                                                                                                                                                                                 |
| SULF         | Sulfates (SO3 or H2SO4)                                                                                                                                                                                        |
| TBUO         | t-Butoxy Radicals                                                                                                                                                                                              |
| TERP         | Terpenes                                                                                                                                                                                                       |
| TOLU         | Toluene                                                                                                                                                                                                        |
| XACE         | As for xHO2                                                                                                                                                                                                    |
| XACR         | As for xHO2                                                                                                                                                                                                    |
| XAF1         | As for xHO2                                                                                                                                                                                                    |
| XAF2         | As for xHO2                                                                                                                                                                                                    |
| XAF3         | As for xHO2                                                                                                                                                                                                    |
| XBAC         | As for xHO2                                                                                                                                                                                                    |
| XBAL         | As for xHO2                                                                                                                                                                                                    |
| XC           | Lost Carbon or carbon in unreactive products                                                                                                                                                                   |
| XCCH         | As for xHO2                                                                                                                                                                                                    |
| XCO          | As for xHO2                                                                                                                                                                                                    |
| XGLY         | As for xHO2                                                                                                                                                                                                    |
| XHCH         | As for xHO2                                                                                                                                                                                                    |
| XHO2         | Formation of HO2 from alkoxy radicals formed in peroxy radical reactions with NO and NO3 (100% yields) and RO2 (50% yields)                                                                                    |
| XGLD         | As for xHO2                                                                                                                                                                                                    |
| XIPR         | As for xHO2                                                                                                                                                                                                    |
| XMA3         | As for xHO2                                                                                                                                                                                                    |
| XMAC         | As for xHO2                                                                                                                                                                                                    |
| XMC3         | As for xHO2                                                                                                                                                                                                    |
| XMEK         | As for xHO2                                                                                                                                                                                                    |
| XMEO         | As for xHO2                                                                                                                                                                                                    |
| XMGL         | As for xHO2                                                                                                                                                                                                    |
| XMVK         | As for xHO2                                                                                                                                                                                                    |
| XN           | Lost Nitrogen or nitrogen in unreactive products                                                                                                                                                               |
| XNO2         | As for xHO2                                                                                                                                                                                                    |
| XOH          | As for xHO2                                                                                                                                                                                                    |
| XPD2         | As for xHO2                                                                                                                                                                                                    |
| XRCH         | As for xHO2                                                                                                                                                                                                    |
| XRC3         | As for xHO2                                                                                                                                                                                                    |
| XRN3         | As for xHO2                                                                                                                                                                                                    |
| XTBU         | As for xHO2                                                                                                                                                                                                    |
| Y6PX         | As for ROOH, but for R6PX                                                                                                                                                                                      |
| YAPX         | As for ROOH, but for RAPX                                                                                                                                                                                      |
| YRPX         | Formation of ROOH following RO2 + HO2 reactions                                                                                                                                                                |
| ZRN3         | Formation of RNO3 in the RO2 + NO, reaction.                                                                                                                                                                   |
